# Supplementary material for: High-intensity interval exercise training before abdominal aortic aneurysm repair (HIT-AAA): protocol for a randomised controlled feasibility trial
Source: PubMed Central journal article supplement — BMJ Open. 2014 Jan 10;4(1):e004094. doi: 10.1136/bmjopen-2013-004094 (PMC3902383; doi:10.1136/bmjopen-2013-004094), 2014-01-10
Supplement: bmjopen-2013-004094.draft_revisions.pdf [file bmjopen-2013-004094.draft_revisions.pdf]

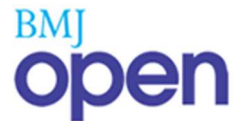

**High-intensity Interval exercise Training before Abdominal  
Aortic Aneurysm repair (HIT-AAA): protocol for a  
randomised controlled feasibility trial**

|                                 |                                                                                                                                                                                                                                                                                                                                                                                                                                                                                                                                                                                                                                                                                                                                                                          |
|---------------------------------|--------------------------------------------------------------------------------------------------------------------------------------------------------------------------------------------------------------------------------------------------------------------------------------------------------------------------------------------------------------------------------------------------------------------------------------------------------------------------------------------------------------------------------------------------------------------------------------------------------------------------------------------------------------------------------------------------------------------------------------------------------------------------|
| Journal:                        | <i>BMJ Open</i>                                                                                                                                                                                                                                                                                                                                                                                                                                                                                                                                                                                                                                                                                                                                                          |
| Manuscript ID:                  | bmjopen-2013-004094                                                                                                                                                                                                                                                                                                                                                                                                                                                                                                                                                                                                                                                                                                                                                      |
| Article Type:                   | Protocol                                                                                                                                                                                                                                                                                                                                                                                                                                                                                                                                                                                                                                                                                                                                                                 |
| Date Submitted by the Author:   | 25-Sep-2013                                                                                                                                                                                                                                                                                                                                                                                                                                                                                                                                                                                                                                                                                                                                                              |
| Complete List of Authors:       | Tew, Garry; Sheffield Hallam University, Centre for Sport and Exercise Science<br>Weston, Matthew; Teesside University, School of Social Sciences & Law<br>Kothmann, Elke; James Cook University Hospital, Department of Academic Anaesthesia<br>Batterham, Alan; Teesside University, Health and Social Care Institute<br>Gray, Joanne; Northumbria University, Faculty of Health & Life Sciences<br>Kerr, Karen; Northern General Hospital, Department of Anaesthesia<br>Martin, Denis; Teesside University, Health and Social Care Institute<br>Nawaz, Shah; Northern General Hospital, Sheffield Vascular Institute<br>Yates, David; York Hospital, Department of Anaesthesia<br>Danjoux, Gerard; James Cook University Hospital, Department of Academic Anaesthesia |
| <b>Primary Subject Heading</b>: | Sports and exercise medicine                                                                                                                                                                                                                                                                                                                                                                                                                                                                                                                                                                                                                                                                                                                                             |
| Secondary Subject Heading:      | Anaesthesia, Cardiovascular medicine, Health services research, Rehabilitation medicine                                                                                                                                                                                                                                                                                                                                                                                                                                                                                                                                                                                                                                                                                  |
| Keywords:                       | Aortic aneurysm, abdominal, Vascular diseases, Exercise, Rehabilitation, Physical fitness, Feasibility studies                                                                                                                                                                                                                                                                                                                                                                                                                                                                                                                                                                                                                                                           |
|                                 |                                                                                                                                                                                                                                                                                                                                                                                                                                                                                                                                                                                                                                                                                                                                                                          |

SCHOLARONE™  
Manuscripts

1  
2  
3 **High-intensity Interval exercise Training before Abdominal Aortic**  
4 **Aneurysm repair (HIT-AAA): protocol for a randomised controlled**  
5 **feasibility trial**  
6

7  
8 Garry A Tew<sup>1</sup>  
9 Email: [g.tew@shu.ac.uk](mailto:g.tew@shu.ac.uk)  
10

11 Matthew Weston<sup>2</sup>  
12 Email: [m.weston@tees.ac.uk](mailto:m.weston@tees.ac.uk)  
13

14 Elke Kothmann<sup>3</sup>  
15 Email: [elke.kothmann@stees.nhs.uk](mailto:elke.kothmann@stees.nhs.uk)  
16

17 Alan M Batterham<sup>4</sup>  
18 Email: [a.batterham@tees.ac.uk](mailto:a.batterham@tees.ac.uk)  
19

20 Joanne Gray<sup>5</sup>  
21 Email: [joanne3.gray@northumbria.ac.uk](mailto:joanne3.gray@northumbria.ac.uk)  
22

23 Karen Kerr<sup>6</sup>  
24 Email: [Karen.Kerr2@sth.nhs.uk](mailto:Karen.Kerr2@sth.nhs.uk)  
25

26 Denis Martin<sup>4</sup>  
27 Email: [d.martin@tees.ac.uk](mailto:d.martin@tees.ac.uk)  
28

29 Shah Nawaz<sup>7</sup>  
30 Email: [Shah.Nawaz@sth.nhs.uk](mailto:Shah.Nawaz@sth.nhs.uk)  
31

32 David Yates<sup>8</sup>  
33 Email: [david.yates@york.nhs.uk](mailto:david.yates@york.nhs.uk)  
34

35 Gerard Danjoux<sup>3\*</sup>  
36 \* Corresponding author  
37 Email: [Gerard.danjoux@stees.nhs.uk](mailto:Gerard.danjoux@stees.nhs.uk)  
38

39  
40  
41  
42 1 Centre for Sport and Exercise Science, Sheffield Hallam University, Sheffield S10  
43 2BP, UK  
44

45  
46 2 School of Social Sciences & Law, Teesside University, Middlesbrough, TS1 3BA,  
47 UK  
48

49 3 Department of Academic Anaesthesia, James Cook University Hospital,  
50 Middlesbrough, TS4 3BW, UK  
51

52 4 Health and Social Care Institute, Teesside University, Middlesbrough, TS1 3BA,  
53 UK  
54

55 5 Faculty of Health & Life Sciences, Northumbria University, Benton, Newcastle-  
56 Upon-Tyne, NE7 7XA, UK  
57  
58  
59  
60

1  
2  
3 6 Department of Anaesthesia, Northern General Hospital, Sheffield Teaching  
4 Hospitals Foundation Trust, Sheffield, S5 7AU, UK  
5

6 7 Sheffield Vascular Institute, Northern General Hospital, Sheffield, UK, S5 7AU, UK  
7

8 8 Department of Anaesthesia, York Hospital, York, YO31 8HE, UK  
9  
10  
11  
12  
13  
14  
15  
16  
17  
18  
19  
20  
21  
22  
23  
24  
25  
26  
27  
28  
29  
30  
31  
32  
33  
34  
35  
36  
37  
38  
39  
40  
41  
42  
43  
44  
45  
46  
47  
48  
49  
50  
51  
52  
53  
54  
55  
56  
57  
58  
59  
60

For peer review only

## Abstract

### Introduction

In patients with large abdominal aortic aneurysm (AAA), open surgical or endovascular aneurysm repair procedures are often used to minimise the risk of aneurysm-related rupture and death; however, aneurysm repair itself carries high risk. Low cardiopulmonary fitness is associated with an increased risk of early post-operative complications and death following elective AAA repair. Therefore, fitness should be enhanced before aneurysm repair. High-intensity interval exercise training (HIT) is a potent, time-efficient strategy for enhancing cardiopulmonary fitness. Here, we describe a feasibility study for a definitive trial of a pre-operative HIT intervention to improve post-operative outcomes in patients undergoing elective AAA repair.

### Methods and analysis

A minimum of fifty patients awaiting elective repair of a 5.5-7.0 cm infra-renal AAA will be allocated by minimisation to HIT or usual care control in a 1:1 ratio. Patients allocated to HIT will complete three hospital-based exercise sessions per week, for 4 weeks. Each session will include 2 or 4 minutes of high-intensity stationary cycling followed by the same duration of easy cycling or passive recovery, repeated until a total of 16 minutes of high-intensity exercise is accumulated. Outcomes to be assessed before randomisation and 24 to 48 hours before aneurysm repair include cardiopulmonary fitness, maximum AAA diameter, and health-related quality of life. In the post-operative period, we will record destination (ward or critical care unit), organ-specific morbidity, mortality, and the durations of critical care and hospital stay. Twelve weeks after discharge, participants will be interviewed to re-assess quality of life and determine post-discharge healthcare utilisation. The costs associated with the exercise intervention and healthcare utilisation will be calculated.

### Ethics and dissemination

Ethics approval was secured through Sunderland Research Ethics Committee. The findings of the trial will be disseminated through peer-reviewed journals, and national and international presentations.

**Trial registration:** Current Controlled Trials ISRCTN09433624

### Keywords

Aortic aneurysm, abdominal; Vascular diseases; Exercise; Rehabilitation; Physical fitness; Feasibility studies

## Article summary

### Article focus

- Rates of morbidity and mortality following abdominal aortic aneurysm repair are high. Pre-operative exercise training to improve cardiopulmonary fitness might improve post-operative outcomes.
- The aims of this randomised controlled feasibility trial are (1) to explore potential primary outcomes for a subsequent definitive trial, (2) to examine the suitability of a high-intensity interval exercise training (HIT) programme for improving cardiopulmonary fitness pre-operatively, and (3) to examine the willingness of patients to be randomised and explore potential patient preferences.

### Key messages

- Here we describe the protocol for a feasibility trial of a pre-operative HIT intervention versus usual care to improve post-operative outcomes in patients undergoing elective AAA repair.
- This preliminary trial will be used to inform a subsequent definitive trial.

### Strengths and limitations of this study

- Appropriate allocation and analysis procedures will be used.
- A broad range of assessment methods will be used to comprehensively evaluate the feasibility, acceptability and efficacy of the pre-operative exercise intervention.
- The sample size is too small to provide accurate data on clinical and cost effectiveness; however, it is sufficiently large to inform the design of a subsequent definitive trial.

## Introduction

Major non-cardiac surgery is associated with substantial peri-operative risk; the overall mortality rate appears low (c. 1-2%), but the number of operations performed (c. 250 million per annum worldwide) results in a large absolute number of deaths.<sup>1</sup> Moreover, post-operative complications occur up to 5 times as frequently,<sup>1</sup> with survivors experiencing physical limitations and reduced life expectancy.<sup>2,3</sup> Identification of individuals in this 'at risk' group for death and complications creates a significant challenge to clinicians in the pre-operative period. Objective assessment of cardiopulmonary fitness in the pre-operative period utilising cardiopulmonary exercise testing (CPET) is the established gold standard across the UK. It has a developing evidence base in predicting adverse outcome across a variety of high-risk surgical procedures,<sup>4</sup> and this has contributed substantially to clinicians' understanding of the impact of poor cardiopulmonary fitness.

There is a convincing physiological rationale linking improved cardiopulmonary fitness to a reduction in adverse outcome following surgery. The surgical stress response involves neuroendocrine, metabolic and inflammatory effects leading to a catabolic state and increased basal metabolic rate (up to three times pre-operative values<sup>5,6</sup>). A patient with adequate cardiopulmonary fitness is able meet these extra demands post-operatively, but patients with inadequate fitness levels might be unable to cope, leading to tissue hypoxia and peri-operative complications. Approximately half of patients presenting for intra-abdominal surgery do not have the pre-requisite fitness, on objective exercise testing, to be deemed 'low risk' for peri-operative complications.<sup>7</sup> It is intuitive that improving fitness levels in the pre-operative period will translate to reduced death and complications following major surgery.

Little is known about the impact of pre-operative exercise training on post-operative outcomes. In a recent systematic review,<sup>8</sup> the authors concluded that pre-operative exercise therapy prior to cardiac or abdominal surgery results in a reduced hospital length of stay and reduced post-operative morbidity, but that more research is required on the impact and long-term benefits. However, of the five studies identified that focused on cardiac and abdominal surgery, four involved inspiratory muscle training with pulmonary complications as the primary outcome. Clearly, this intervention improves respiratory muscle function, which might reduce post-operative pulmonary morbidity. However, this form of training is unlikely to favourably influence the wider range of sequelae of the surgical stress response. Only one study focused on the effect of a more general pre-surgery exercise training intervention. Arthur *et al.*<sup>9</sup> reported a reduction in median hospital length of stay of 1-day (vs. usual care control) following coronary artery bypass graft surgery with an 8-10 week exercise training programme plus education reinforcement and social support. The intervention involved 30 minutes of aerobic interval training, performed twice a week at 40-70% of functional capacity.

We believe that a programme of research is needed now to evaluate the benefits of pre-operative exercise training in patients undergoing elective non-cardiothoracic surgery. Abdominal aortic aneurysm (AAA) is a frequently lethal disease occurring in ~5% of males aged 50-79 years.<sup>10</sup> Annually 5,000-6,000 surgical repairs are performed across the UK,<sup>11</sup> making this an ideal homogenous high-risk target

1  
2  
3 population. The incidence of co-morbid disease is higher than other age-matched  
4 surgical populations: cardiac disease 60-70%, respiratory disease 40-50%, long-term  
5 smoking 50-80%, renal disease 10-12% and diabetes 10-12%.<sup>12</sup> Anecdotal  
6 observation from >1000 CPETs confirms that this population is also substantially  
7 less fit than other age-matched surgical populations. Findings from two recent  
8 publications also support the adverse impact of poor fitness on outcome in patients  
9 undergoing AAA repair.<sup>13,14</sup>  
10

11  
12 Intervention for AAA can be performed by either open or endovascular repair (EVAR),  
13 with a current ratio nationally of 55:45 in favour of EVAR.<sup>11</sup> 30-day mortality for open  
14 surgery in the UK in 2008 was 7-8%.<sup>12</sup> Earlier studies from the USA<sup>15</sup> and the  
15 Netherlands<sup>16</sup> reported major post-operative morbidity of 30-40%. Endovascular  
16 treatment is less invasive, with mortality and cardio-respiratory morbidity rates of 2-  
17 3%<sup>11,12</sup> and 10-15%,<sup>15,16</sup> respectively. For open surgery the UK mortality rate was  
18 higher than expected with respect to comparable countries, prompting the  
19 publication of a Quality Improvement Programme document with the explicit remit of  
20 standardising management to improve outcome.<sup>11</sup> Encouragingly such  
21 standardisation has brought about a significant 30-day mortality benefit for both  
22 procedures in the Vascular Society's most recent publication: 4.3% and 0.9% for  
23 open AAA and EVAR respectively.<sup>17</sup> Despite this there remains significant room for  
24 improvement. No information is routinely available on non-fatal complications, which  
25 are up to five times more prevalent than mortality and known to affect patient quality  
26 of life and overall life expectancy on hospital discharge. In addition, a key omission  
27 from the guidance is evidence or advice in relation to improving preoperative fitness,  
28 despite the fact that one of the main conclusions of the EVAR-2 study was that  
29 vascular teams should be focusing on techniques to improve patient fitness  
30 preoperatively.<sup>18</sup>  
31  
32  
33

34 The proposed benefits of exercise "prehabilitation" are mediated by increases in  
35 cardiopulmonary fitness. Two pilot randomised controlled trials undertaken by our  
36 research team have documented improvements in cardiopulmonary fitness following  
37 moderate-intensity endurance exercise training in patients under surveillance for a  
38 small AAA. Kothmann *et al.*<sup>19</sup> reported a 10% increase in the oxygen consumption at  
39 the ventilatory threshold (a sub-maximal marker of cardiopulmonary fitness of  
40 prognostic significance) after 6 weeks of moderate-intensity cycling exercise  
41 performed for 30 minutes twice weekly. Tew *et al.*<sup>20</sup> observed a 2.5 mL·kg<sup>-1</sup>·min<sup>-1</sup>  
42 (~20%) improvement in the ventilatory threshold after 12 weeks of moderate-  
43 intensity cycling and treadmill walking exercise performed for 35-45 minutes thrice  
44 weekly. A recent review of preoperative exercise training proposed a research  
45 agenda,<sup>21</sup> with future directions including the role of prehabilitation in improving  
46 fitness levels prior to major surgery, the use of robust study designs with appropriate  
47 outcome measures, and evaluations of the effects of high-intensity interval exercise  
48 training (HIT) as a model for which there is extensive evidence of benefit in other  
49 subject groups, including heart failure patients.<sup>22</sup> A recent literature review by Giraud  
50 in cardiac rehabilitation concluded that when compared to moderate intensity  
51 training,<sup>23</sup> HIT has a similar safety profile (low absolute risk) and produces greater  
52 and more time-efficient improvements in fitness. For the current proposal HIT  
53 therefore represents a particularly attractive approach, as the time-window for  
54 intervention once a patient has been identified for aneurysm repair might be as short  
55  
56  
57  
58  
59  
60

1  
2  
3 as 4-6 weeks.<sup>11</sup> Therefore, an intervention with the potential for more rapid fitness  
4 benefits is preferable.  
5

6  
7 Our programme of work is aligned to the Medical Research Council's guidance for  
8 developing and evaluating complex interventions.<sup>24</sup> Given the limited extent of the  
9 evidence base, a feasibility study is clearly required to inform a subsequent definitive  
10 trial. The MRC guidance stresses that crucial feasibility work is often absent or  
11 insufficient, with 'definitive' trials undermined by acceptability, adherence, and  
12 delivery of the intervention, recruitment and retention issues, and smaller than  
13 expected effect sizes.  
14

15 We are conducting a feasibility study to explore the potential benefits of a 4-week  
16 HIT programme, delivered prior to surgery for AAA repair. This will be stationary  
17 cycle-based, in-hospital and undertaken 3 times per week.  
18

## 19 Aims

### 20 *1. Explore potential primary outcomes for a subsequent definitive randomised 21 controlled trial (RCT)*

22 The physiological rationale suggests a causal pathway between adaptations  
23 consequent to exercise training and reduced mortality and morbidity. Potential  
24 primary outcomes for a definitive trial therefore include 30-day mortality, morbidity  
25 [Post-Operative Morbidity Survey (POMS) score], health-related quality of life  
26 (HRQOL), hospital length of stay, costs and cost-effectiveness  
27  
28  
29

### 30 *2. Examine the suitability of the exercise training for a subsequent definitive RCT*

31 High-intensity interval training shows much promise as an efficacious, time-efficient  
32 and also enjoyable intervention for improving fitness. However, it has not been  
33 employed with AAA patients awaiting repair.  
34  
35

### 36 *3. Examine the willingness of patients to be randomised and explore potential patient 37 preferences*

38 In RCTs, patients might have strong treatment preferences resulting in a refusal to  
39 be randomised, affecting the generalisability of results. Or, they might agree to be  
40 randomised but suffer from 'resentful demoralisation' if they end up in the non-  
41 preferred arm of the trial, leading to poor adherence. This issue requires examination  
42 in a feasibility study, as the preference effects for exercise vs. control in this patient  
43 population are unknown. Theoretically, patients might have a preference for the  
44 exercise arm due to a belief in the benefits. Notwithstanding the patient information  
45 provided, others might be fearful of engaging in high-intensity exercise prior to  
46 surgery and therefore might exhibit a preference for the control arm. These issues  
47 could affect the success of a definitive trial.  
48  
49

## 50 Objectives

### 51 *(Aim 1)*

52 Define the characteristics of the potential outcome measures. Specifically,  
53 1. Define the distribution (e.g. log-normal, Poisson etc. for, e.g., length of hospital  
54 stay) and estimate the variability for the potential primary outcome measures to  
55 inform sample size planning for a subsequent definitive trial.  
56  
57  
58  
59  
60



2. Estimate the effect size (intervention minus control) for each potential outcome variable (point estimate and its uncertainty). This information reflects the effectiveness of the intervention and the 'noise' in the measurement (precision of the measure) and together with the other information will inform the choice of primary outcome for a subsequent trial.

3. Assess the ease of data collection for each potential primary outcome (including participant and clinician burden, assessed via qualitative data).

(Aim 2)

This will specifically include; objective fitness changes, safety, enjoyment, delivery and adherence of the exercise intervention

(Aim 3)

Examine the strength of patient preferences for either the intervention or control arms (qualitative data). These data will be elicited from all patients assessed as eligible, to determine the extent to which preferences affect both recruitment and adherence.

## Methods and analysis

### Study Design

Three-centre, two-arm, parallel-group, randomised, controlled feasibility study. The study flowchart is shown in Figure 1.

---

#### Figure 1 Flowchart of the study

AAA, abdominal aortic aneurysm; EVAR, endovascular aneurysm repair; POMS, post-operative morbidity survey

---

### Study Population and Recruitment Routes

Patients being assessed for surgery for a 5.5-7.0 cm AAA will be approached via vascular surgical or preoperative assessment clinics at recruiting institutions. Potential recruits will be approached at this stage by a study investigator and, if interested, provided a study information sheet. Where an investigator is not available, a study information letter will be sent to the patient requesting permission to contact them about the study.

### Sample Size

The sample size for a feasibility study should be adequate to estimate critical parameters with sufficient precision. Herein, the critical outcome is adherence to the exercise intervention. A patient will be deemed compliant if they complete  $\geq 75\%$  of the scheduled sessions; i.e. 9/12 sessions for a 4-week intervention, plus all once-weekly maintenance sessions if surgery is delayed. We define success with respect to adherence as a lower limit of 0.67 (c. 2/3 of the population) for the 90% confidence interval for the proportion of the exercise group complying with the intervention. We estimate that  $\geq 85\%$  of the exercise group will be 'compliers' based

1  
2  
3 on our pilot studies in small AAA patients.<sup>19,20</sup> A 90% confidence interval for a single  
4 proportion around a value of 0.85 is 0.68 to 0.95 with n=25 patients. Using a 1:1  
5 allocation ratio we require 25 patients per trial arm, 50 in total.  
6

7  
8 A minimum of 50 participants will therefore be recruited to the study.  
9

10 Approximately 150 repairs of AAA <7.0 cm are performed across our three clinical  
11 institutions annually. Assuming 30% attrition for specialist referral and lack of pre-  
12 requisite fitness, approximately 176 potential patients will be available in our 21-  
13 month recruitment time-window.  
14

## 15 **Clinical Assessment**

16  
17 The clinical assessment processes described are based on routine practice at the  
18 recruiting institutions. All patients who are being considered for an elective AAA  
19 repair will attend a preoperative assessment clinic. Here, an individual's clinical risk  
20 profile for surgery will be established using history of relevant co-morbidities,  
21 physical examination and CPET. Evidence-based optimisation of medication will be  
22 performed at this stage.  
23

24  
25 After risk profiling, a patient's treatment options are discussed in a vascular  
26 multidisciplinary team meeting comprising input from surgery, anaesthesia and  
27 radiology. A risk-benefit assessment is undertaken based on a nationally agreed  
28 care pathway.<sup>11</sup> There are three possible outcomes: open aneurysm repair, EVAR or  
29 conservative management (i.e. when surgical risk is deemed too great or the patient  
30 elects not to proceed). The most appropriate postoperative care facility is also  
31 determined.  
32

33  
34 **Eligibility criteria** – see figure 1  
35

## 36 **Recruitment**

37  
38 Patients who express an interest at clinic, or who are sent a study information letter,  
39 will be contacted by telephone inviting participation (if no exclusion criteria). With  
40 verbal consent, the baseline assessment will be scheduled.  
41

## 42 **Baseline assessment**

43  
44  
45 Written informed consent will be obtained. Participants will confirm their medical  
46 history and current medication and undergo a physical examination. Baseline  
47 measurements will then be recorded, including:  
48

- 49 • Patient characteristics (sex, stature, body mass, body mass index)
- 50 • Resting pulse, blood pressure and oxygen saturations
- 51 • Maximum AAA diameter via trans-abdominal ultrasound (not if an ultrasound  
52 scan has been performed within the previous 8 weeks)
- 53 • Cardiopulmonary fitness via CPET – methods and recorded variables are  
54 described above. The CPET data will be used to identify the intensity at which  
55 the patients in the exercise group will initiate training. We have previously  
56 demonstrated the reliability of CPET in AAA patients.<sup>25</sup> Testing will be  
57  
58  
59  
60

performed according to an agreed protocol across all recruiting sites (available on request).

- HRQOL using the Medical Outcomes Study SF-36 version 2 questionnaire and the EuroQol EQ-5D-5L questionnaire, both of which have been used previously in AAA patients.<sup>18,26,27</sup>
- Participant preference for 'exercise' training or 'usual care' – prior to randomisation to explore patient preferences and subsequent changes in attitude consequent to the intervention. This design permits the exploration of the effects of preference in the analysis.<sup>28</sup>

## Randomisation

After baseline assessment, patients will be randomly allocated 1:1 to exercise or usual care control (no supervised exercise), using minimisation to ensure balance across trial arms for important prognostic factors. We do not list these factors here, to avoid any risk of the staff recruiting patients being able to decipher the allocation sequence. Full details of the minimisation process will be published in a separate document with restricted access. The study statistician (AB) will conduct the minimisation process remotely via e-mail.

## Exercise Intervention (weeks 1-4)

The exercise intervention period will be for 4 weeks leading up to surgery. Where possible, participants (exercise and control) will have a surgical date booked for the following week (week 5).

The exercise programme is broadly based on that which has been shown to be safe and effective for improving cardiopulmonary fitness in patients undergoing cardiac rehabilitation.<sup>22,29-31</sup> Patients allocated to the exercise group will complete three sessions of hospital-based HIT per week, throughout the 4-week pre-operative period. Exercise will be stationary cycling (Optibike Med, Ergoline, Germany), which has been reported to be a preferred mode for vascular patients (unpublished observations). Each session will begin and end with 10 and 5 minutes of unloaded cycling, respectively. In the first week of training, the main body of each session will involve eight 2-minute bouts of cycling, interspersed with 2-minute periods of unloaded cycling or "off-the-bike" slow walking, depending on patient preference. All of the "work" bouts during the very first session will be performed at the power output associated with ventilatory threshold determined on baseline CPET (i.e. the demarcation between moderate and heavy exercise intensity domains<sup>32</sup>). In subsequent sessions, power output will be gradually manipulated until the patient reports a perceived exertion of 6-7 on Borg's CR-10 scale<sup>33</sup> (i.e. hard to very hard) at the end of each work interval. However, for safety reasons, the intensity of exercise will be made easier if systolic blood pressure exceeds 180 mm Hg<sup>34</sup> or if heart rate exceeds 95% of the maximum observed on baseline CPET. In weeks 2-4, and for variety, the patient will be allowed to choose between doing four 4-minute work bouts or eight 2-minute bouts as the main body of each exercise session, both with a 1:1 work-to-rest ratio. Thus, each session will last ~45 minutes regardless of patient choice, which will include 16 minutes of high-intensity exercise. An experienced physiotherapist will supervise each session and record power output, perceived exertion, and blood pressure (manual sphygmomanometer) at the end of each work

1  
2  
3 interval. Heart rate will be recorded continuously at 5-s intervals through the entire  
4 exercise session (Polar RS400, Kempele, Finland). The collection of such data will  
5 permit a detailed quantification of the exercise intervention. Patients who do not  
6 undergo surgery in week 5 will complete one HIT session per week up until surgery  
7 to maintain fitness.<sup>35</sup> All adverse events will be recorded.  
8

9  
10 Information in relation to *participant's perceived enjoyment of exercise* is important to  
11 monitor. This is of relevance in adherence to the programme, whilst providing  
12 valuable information for planning a definitive study. We therefore plan to assess:

- 13 1. Changes in enjoyment of exercise both within sessions and throughout the  
14 programme. Perceived or likely enjoyment can change prior, during and after  
15 exercise as a consequence of a variety of factors e.g. anxiety, enjoyment,  
16 fatigue. We therefore plan to ask participants to assess enjoyment/perceived  
17 enjoyment of exercise prior to commencing, during and 20 minutes after  
18 exercise using a simple validated rating scale.<sup>36</sup> This will take <30 seconds to  
19 administer on each occasion and will be done during the first (baseline), 3<sup>rd</sup>,  
20 6<sup>th</sup>, 9<sup>th</sup> and 12<sup>th</sup> sessions to track changes consequent to the programme.  
21
- 22 2. Overall enjoyment of the exercise programme will be assessed during the  
23 week 5 assessment, using the validated multi-dimensional physical activity  
24 enjoyment scale (PACES).<sup>37</sup> This will be 2-3 days following completion of the  
25 overall programme, allowing participants reflection and evaluation time (see  
26 week 5 assessment below).  
27

28 Two experienced exercise scientists will be responsible for ensuring treatment  
29 fidelity of the exercise programme (GT, MW).  
30

### 31 **Safety Considerations**

32  
33  
34 There are two main safety considerations regarding running a programme of HIT in  
35 patients with AAA disease:

- 36 1. Cardiac risk – as previously outlined 60-70% of individuals with AAA disease  
37 suffer from comorbid cardiac disease. The baseline assessment of clinical risk  
38 profile and CPET will be instrumental in assessing this risk in detail, under the  
39 stress of exercise, at the outset. A recent review by Guiraud *et al.*<sup>23</sup> highlights  
40 the safety of HIT in patients with underlying coronary disease, heart failure  
41 and patients at risk of cardiovascular disease. We are reassured by their  
42 conclusion which states "there is growing scientific evidence that HIT presents  
43 little danger for selected stable cardiac patients, provided that the prescribed  
44 protocols are respected".  
45

46  
47 In the event of an adverse cardiac event we will have the following in place:

- 48 • Staff experienced and Intermediate Life Support-trained
- 49 • Resuscitation equipment and oxygen immediately available
- 50 • Hospital cardiac arrest team fully informed of time and place of training  
51 sessions
- 52 • Participants requiring further assessment will be transferred to the  
53 Accident and Emergency Unit within the relevant hospital.  
54

55  
56 All institutions have Cardiology expertise immediately available on site.  
57  
58  
59  
60

1  
2  
3  
4  
5  
6  
7  
8  
9  
10  
11  
12  
13  
14  
15  
16  
17  
18  
19  
20  
21  
22  
23  
24  
25  
26  
27  
28  
29  
30  
31  
32  
33  
34  
35  
36  
37  
38  
39  
40  
41  
42  
43  
44  
45  
46  
47  
48  
49  
50  
51  
52  
53  
54  
55  
56  
57  
58  
59  
60

2. Risk of AAA expansion or rupture – an intuitive concern regarding exercise testing and training in patients with aneurysms is of excessive rises in double-product (systolic blood pressure × heart rate) evoking aneurysm expansion and rupture. However, the available evidence suggests that these concerns are unfounded. For example, no aneurysm ruptures or excessive aneurysm growth rates were reported in any of the three studies of moderate-intensity exercise training in patients with early AAA disease (from >4000 exercise sessions<sup>19,20,38</sup>), two of which were conducted at our institutions.<sup>19,20</sup> Further unpublished data from our institutions indicate no ruptures from >1300 maximal exercise tests in patients with large asymptomatic AAA being considered for elective aneurysm repair. Moreover, through national networked connections, and other relevant publications, we believe this position of safety to be correct for >5000 maximal exercise tests. This position is also supported by the European guidelines for the management of AAA disease, which state that physical activity is not associated with AAA growth,<sup>39</sup> as well as the ACC/AHA Practice Guidelines for the Management of Patients with Peripheral Vascular Disease,<sup>40</sup> which suggest that AAA patients should not be fearful of vigorous activity. The only reported adverse event we are aware of came from the patient series of Best *et al.*<sup>41</sup> where a rupture occurred 12 hours after maximal exercise testing in a patient with a 6.1 cm AAA, yielding a rupture rate for this study of 0.4%. However, the causal relationship between exercise and rupture is difficult to establish given the 12-hour intervening period.

It would therefore appear that the risk of AAA growth or rupture is very low in the context of exercise training for individuals with both small and large aneurysmal disease. This risk would appear to be <1:5,000. When balanced against national perioperative mortality/morbidity figures available for surgery in the UK at present, we feel that this represents clear benefit in favour of undertaking the preoperative exercise as set out.

In the event of a suspected AAA rupture patients would immediately be transferred to the Accident and Emergency department for prompt further evaluation. All clinical institutions have on-site vascular teams able to immediately respond to such a situation.

Despite this we see risk minimisation in this context as our primary concern and will implement the following control measures:

- Thorough pre-participation screening
- Exclusion of high-risk patients
- Hospital-based exercise testing and training
- Exercise sessions supervised by experienced cardiac physiotherapists trained in Intermediate Life Support
- Exercise sessions performed >3 hours after waking given the higher frequency of cardiovascular events during the morning hours<sup>42</sup>
- Prompt evaluation of prodromal symptoms
- Resuscitation equipment and oxygen immediately available
- Exercise termination if a patient has signs/symptoms suggestive of distress, cardiac or AAA adverse event

- Reduction in exercise intensity if a patient has systolic blood pressure rise to >180 mm Hg, or heart rate >95% of their maximum (from baseline CPET)

### Safety Governance

In line with Medical Research Council guidance we have developed the following safety governance structure for the study:

- Data Monitoring and Ethics Committee (DMEC) – the DMEC comprises three academics/clinicians with appropriate expertise who are independent from the running of the study. Any serious adverse events will be reported to and fully investigated by the DMEC. The DMEC will make recommendations to the Trial Steering Committee with regards to any ethical or safety concerns they may have.
- Trial Steering Committee (TSC) – this committee is led by the Chief Investigator (CI), with representation from all collaborating clinical and academic institutions. A lay representative will be approached to sit on the committee. The TSC will meet 3 times per year to discuss all elements of study progress and conduct.
- TSC Safety Committee – a formal study safety committee has been established and comprises 3 study investigators, including the CI. This group has the remit of ensuring all appropriate safety standards are in place prior to study commencement, and during the course of the research.

All adverse and serious adverse events will be managed within the strict governance arrangements of the study sponsor and participating clinical institutions.

### **Week 5 assessments**

During week 5 it is anticipated that participants will undergo AAA repair. In the same week, but 1-2 days prior to surgery, assessments will be performed in all participants. The outcomes, which are primarily aimed at investigating the safety and effectiveness of the exercise intervention compared with usual care, will include:

- Cardiopulmonary fitness via CPET (to assess fitness changes from baseline)
- Maximum AAA diameter via trans-abdominal ultrasound (to establish safety of exercise in relation to aneurysm growth)
- HRQOL questionnaires
- PACES assessment for overall exercise programme enjoyment (exercise intervention group only)

Due to logistical reasons it is anticipated that not all participants will undergo surgery in week 5. This will mainly be due to a temporary lack of hospital beds for admission preoperatively, or critical care post-operatively. In this situation, surgery will be rescheduled, where possible, within 4 weeks. A repeat CPET will be undertaken in patients whose surgery is delayed >4 weeks, to ensure we have an accurate assessment of pre-operative fitness in all patients. A CPET assessment of those patients who have performed one high-intensity training session per week from week 5 onwards will provide further valuable information of the dose-response nature of high-intensity training in this population.

An overview of data to be collected for this aspect of the study can be seen on the study Case Report Form (see Additional file 1).

## Perioperative period

Participants will undergo open or endovascular aneurysm repair as determined at the multidisciplinary team meeting. All perioperative care will be at the discretion of the vascular teams (as per usual practice) who will be blinded to group allocation. Perioperative data will be collected as seen in Additional file 1.

Post-operatively an investigator blinded to group allocation will determine the following:

- Destination – ward or critical care unit
- Postoperative Morbidity Survey Score (POMS) – a validated tool used to assess organ-specific morbidity in the post-operative period.<sup>43,44</sup> Scores will be collected daily.
- Mortality
- Length of critical care and hospital stay

## Post-discharge follow-up

At hospital discharge patients will be asked to keep a service receipt inventory to record treatment/care requirements for a 12-week period to inform the resource utilisation analysis. Participants will be interviewed via telephone at 6 weeks, with a follow-up appointment at 12 weeks after discharge to assess:

- HRQOL
- Resource utilisation
- Hospital readmissions, with diagnosis, within 12 weeks of initial discharge

## Analysis Plan of Quantitative Study

Adherence with the exercise intervention will be analysed as described in the sample size justification, above, via the confidence interval for a single proportion. For the potential primary outcomes for a subsequent definitive trial, the likely effect of the exercise intervention will be estimated via standard intervention minus control comparisons (accounting for the type of variable and its distributional properties). We will examine the disposition of the 90% confidence interval for the observed effect to the minimum clinically important difference for each variable. Inasmuch as this is a feasibility study, these comparisons are exploratory and are intended to inform the subsequent trial. Data management will be performed according to the governance arrangements of the institutions involved in the project.

## Analysis of Health Economics and Cost Effectiveness

A prospective economic evaluation will be rehearsed to develop and refine methods for a subsequent definitive trial. The main focus will be on how to accurately identify, quantify and value the additional costs of delivering the intervention and the potential resource implications versus usual care post-operatively and post-discharge. The costing approach will incorporate a broad analytical perspective (National Health Service and Social Services), which will help to detect cost-shifting between sectors. Resources utilised in the exercise group will be identified in terms of capital equipment and staff time. A staff-reported health economics questionnaire has been

1  
2  
3 developed to facilitate this (available upon request). Post-operative resource use will  
4 also be explored for all participants in terms of bed days (including critical care bed  
5 days). Post-discharge resource use for all treatment/care related to AAA surgery will  
6 be assessed retrospectively for 12 weeks by piloting the use of a self-report Service  
7 Receipt Inventory (patient diary). This will facilitate the development of a reliable and  
8 valid tool to capture resource use. Appropriate unit costs to be applied to resource  
9 use will be identified. These will be sourced from a combination of local costings and  
10 national databases.<sup>45,46</sup> All costs will be combined to rehearse the methods for total  
11 health and social care cost estimation in a subsequent definitive trial.  
12  
13

14 The methods to estimate an incremental cost-effectiveness ratio for exercise versus  
15 usual care in terms of Quality Adjusted Life Years will be rehearsed (using EQ-5D 5L  
16 administered at baseline and 12 weeks post discharge). In particular, issues relevant  
17 for sensitivity analysis will be explored to help understand how best to deal with  
18 statistical imprecision and other uncertainties in the full trial. For example, data will  
19 be bootstrapped to account for the expected skewness evident in economic cost  
20 data. The data collected as part of this feasibility study could be used to inform  
21 subsequent pre-trial modelling.  
22  
23

### 24 **Analysis of Participant Interviews**

25  
26 We aim to explore participants' post-discharge experience. From a critical realism  
27 perspective, semi-structured interviews will cover quality of life, function and attitudes  
28 to exercise including fear.  
29  
30

31 Sixteen participants will be recruited using purposive sampling and the following  
32 criteria: men and women; a range of ages; both study groups; both forms of  
33 aneurysm repair; and a range of experiences post-discharge. The interviews (1 hour  
34 with a research nurse; audio-recorded and transcribed) will take place in the hospital  
35 at the 12-week post-discharge visit. Transcripts will be analysed thematically using  
36 quantitative and diary data for triangulation.  
37  
38

39 Qualitative data (brief interview) will also be collected from all participants (and from  
40 clinical outcome assessors where relevant) to assess the ease of data collection for  
41 each potential primary outcome (participant and clinician burden), to evaluate the  
42 perceived enjoyment of the exercise intervention, and to examine the strength of  
43 patient preferences for either the intervention or control arms. These data will be  
44 elicited from all patients assessed as eligible, to help determine the extent to which  
45 preferences affect both recruitment and adherence.  
46  
47

### 48 **Criteria for success**

49 A subsequent definitive RCT will be deemed feasible if:

- 50 1. An appropriate primary outcome variable is defined;
- 51 2. The lower limit of the 90% confidence interval for the proportion of the exercise  
52 intervention group complying with the intervention is  $\geq 67\%$ . A patient is defined as  
53 having complied with the intervention if he completes  $\geq 75\%$  of the scheduled  
54 sessions;
- 55 3. Patient preferences are not so strong that they result in the conclusion that an  
56 RCT is not a feasible design.  
57  
58  
59  
60



## Ethics and dissemination

Ethics approval was secured through Sunderland Research Ethics Committee (reference 13/NE/0116) in May 2013.

The dissemination strategy for this research will be to inform a wide range of local, national and international audiences about the results and conclusions. It must however be remembered as part of this strategy that the current proposal is for preliminary work aimed at defining a subsequent definitive clinical trial.

1. Health professionals – we aim to publish our research in journals that cover the relevant medical specialties and with preference for those that deposit publications in open access databases to increase free dissemination. In addition, we aim to present this research at appropriate national and international conferences.
2. Users – from this perspective we aim in the first instance to collaborate with our patient representatives (from advisory and steering groups) and local experts in patient and public involvement to best facilitate user dissemination. We plan to write a specific news piece that will be forwarded to appropriate groups and organisations.
3. Service managers – as an exploratory study it is unlikely that results from this study will directly influence commissioning processes in the short term. More we will engage with appropriate primary and secondary care groups to discuss support for our proposed definitive study leading on from this research.

## Trial status

Start date: 1 August 2013

Expected end date: 30 May 2015

Expected publication date: 1 January 2016

Status at time of submission of this article: recruiting

Funder: UK National Institute of Health Research - Research for Patient Benefit Programme (PB-PG-1111-26068)

## List of abbreviations used

|       |                                           |
|-------|-------------------------------------------|
| AAA   | abdominal aortic aneurysm                 |
| CPET  | cardiopulmonary exercise testing          |
| EVAR  | endovascular aneurysm repair              |
| HIT   | high-intensity interval exercise training |
| HRQOL | health-related quality of life            |
| PACES | physical activity enjoyment scale         |
| POMS  | post-operative morbidity survey           |
| RCT   | randomised controlled trial               |

## Competing interests

The authors declare that they have no competing interests.

## Authors' contributions

GT drafted the manuscript and contributed to the design of the study. Original study concept was by GD and AB. All co-authors contributed to the design of the study. GD is Chief Investigator for the project. EK is Principal Investigator (PI) at James Cook University Hospital (South Tees), SN is PI at Northern General Hospital (Sheffield) and DY is PI at York Hospital. All authors contributed to the critical revision of the manuscript for important intellectual content and read and approved the final manuscript.

## Acknowledgements

This study is funded by the National Institute for Health Research (NIHR) under its Research for Patient Benefit (RfPB) Programme (Grant Reference Number PB-PG-1111-26068). The views expressed are those of the authors and not necessarily those of the NHS, the NIHR or the Department of Health. The following individuals are acknowledged for making a substantial contribution to the development of this study: Louise Cawthorn, Susan Ward and Esther Carr. The primary trial sponsor is South Tees NHS Foundation Trust (Marton Road, Middlesbrough, TS4 3BW).

## References

1. Pearse RM, Holt PJ, Grocott MP. Managing perioperative risk in patients undergoing elective non-cardiac surgery. *BMJ* 2011,**343**:d5759.
2. Head J, Ferrie JE, Alexanderson K, *et al*. Diagnosis-specific sickness absence as a predictor of mortality: the Whitehall II prospective cohort study. *BMJ* 2008,**337**:a1469.
3. Khuri SF, Henderson WG, DePalma RG, *et al*. Determinants of long-term survival after major surgery and the adverse effect of postoperative complications. *Ann Surg* 2005,**242**:326-341.
4. Hennis PJ, Meale PM, Grocott MP. Cardiopulmonary exercise testing for the evaluation of perioperative risk in non-cardiopulmonary surgery. *Postgrad Med J* 2011,**87**:550-557.
5. Viale JP, Annat GJ, Ravat FM, *et al*. Oxygen uptake and mixed venous oxygen saturation during aortic surgery and the first three postoperative hours. *Anesth Analg* 1991,**73**:530-535.
6. Older P, Smith R. Experience with the preoperative invasive measurement of haemodynamic, respiratory and renal function in 100 elderly patients scheduled for major abdominal surgery. *Anaesth Intensive Care* 1988,**16**:389-395.

- 1  
2  
3 7. Wilson RJ, Davies S, Yates D, *et al*. Impaired functional capacity is  
4 associated with all-cause mortality after major elective intra-abdominal  
5 surgery. *Br J Anaesth* 2010,**105**:297-303.
- 6  
7 8. Valkenet K, van de Port IG, Dronkers JJ, *et al*. The effects of preoperative  
8 exercise therapy on postoperative outcome: a systematic review. *Clin Rehabil*  
9 2011,**25**:99-111.
- 10  
11 9. Arthur HM, Daniels C, McKelvie R, *et al*. Effect of a preoperative intervention  
12 on preoperative and postoperative outcomes in low-risk patients awaiting  
13 elective coronary artery bypass graft surgery. A randomized, controlled trial.  
14 *Ann Intern Med* 2000,**133**:253-262.
- 15  
16 10. Lederle F, Johnson G, Wilson S, *et al*. Abdominal aortic aneurysm in women.  
17 *J Vasc Surg* 2001,**34**:122-126.
- 18  
19 11. National Abdominal Aortic Aneurysm Quality Improvement Programme  
20 Interim report [[http://www.aaaqip.com/files/aaaqip-interim-report-new-final-](http://www.aaaqip.com/files/aaaqip-interim-report-new-final-printed-version-23-06-11.pdf)  
21 [printed-version-23-06-11.pdf](http://www.aaaqip.com/files/aaaqip-interim-report-new-final-printed-version-23-06-11.pdf)]
- 22  
23 12. Second Vascular Surgery Database Report 2008  
24 [[http://www.esvs.org/sites/default/files/file/Vascunet/Vascunet%20report%20](http://www.esvs.org/sites/default/files/file/Vascunet/Vascunet%20report%202008.pdf)  
25 [008.pdf](http://www.esvs.org/sites/default/files/file/Vascunet/Vascunet%20report%202008.pdf)]
- 26  
27 13. Hartley RA, Pichel AC, Grant SW, *et al*. Preoperative cardiopulmonary  
28 exercise testing and risk of early mortality following abdominal aortic  
29 aneurysm repair. *Br J Surg* 2012,**99**:1539-1546.
- 30  
31 14. Prentis JM, Trenell MI, Jones DJ, *et al*. Submaximal exercise testing predicts  
32 perioperative hospitalization after aortic aneurysm repair. *J Vasc Surg*  
33 2012,**56**:1564-1570.
- 34  
35 15. Elkouri S, Gloviczki P, McKusick MA, *et al*. Perioperative complications and  
36 early outcome after endovascular and open surgical repair of abdominal aortic  
37 aneurysms. *J Vasc Surg* 2004,**39**:497-505.
- 38  
39 16. Prinssen M, Verhoeven EL, Buth J, *et al*. A randomized trial comparing  
40 conventional and endovascular repair of abdominal aortic aneurysms. *N Engl*  
41 *J Med* 2004,**351**:1607-1618.
- 42  
43 17. Outcomes after Elective Repair of Infra-renal Abdominal Aortic Aneurysm  
44 [[http://www.vascularsociety.org.uk/vascular/wp-](http://www.vascularsociety.org.uk/vascular/wp-content/uploads/2012/11/VSGBI-Mortality-Report.pdf)  
45 [content/uploads/2012/11/VSGBI-Mortality-Report.pdf](http://www.vascularsociety.org.uk/vascular/wp-content/uploads/2012/11/VSGBI-Mortality-Report.pdf)]
- 46  
47 18. EVAR trial participants. Endovascular aneurysm repair and outcome in  
48 patients unfit for open repair of abdominal aortic aneurysm (EVAR trial 2):  
49 randomised controlled trial. *Lancet* 2005,**365**:2187-2192.
- 50  
51 19. Kothmann E, Batterham AM, Owen SJ, *et al*. Effect of short-term exercise  
52 training on aerobic fitness in patients with abdominal aortic aneurysms: a pilot  
53 study. *Br J Anaesth* 2009,**103**:505-510.
- 54  
55 20. Tew GA, Moss J, Crank H, *et al*. Endurance exercise training in patients with  
56 small abdominal aortic aneurysm: a randomized controlled pilot study. *Arch*  
57 *Phys Med Rehabil* 2012,**93**:2148-2153.
- 58  
59 21. Jack S, West M, Grocott MP. Perioperative exercise training in elderly  
60 subjects. *Best Pract Res Clin Anaesthesiol* 2011,**25**:461-472.
22. Wisløff U, Støylen A, Loennechen JP, *et al*. Superior cardiovascular effect of  
aerobic interval training versus moderate continuous training in heart failure  
patients: a randomized study. *Circulation* 2007,**115**:3086-3094.
23. Guiraud T, Nigam A, Gremeaux V, *et al*. High-intensity interval training in  
cardiac rehabilitation. *Sports Med* 2012,**42**:587-605.

- 1
  - 2
  - 3
  - 4
  - 5
  - 6
  - 7
  - 8
  - 9
  - 10
  - 11
  - 12
  - 13
  - 14
  - 15
  - 16
  - 17
  - 18
  - 19
  - 20
  - 21
  - 22
  - 23
  - 24
  - 25
  - 26
  - 27
  - 28
  - 29
  - 30
  - 31
  - 32
  - 33
  - 34
  - 35
  - 36
  - 37
  - 38
  - 39
  - 40
  - 41
  - 42
  - 43
  - 44
  - 45
  - 46
  - 47
  - 48
  - 49
  - 50
  - 51
  - 52
  - 53
  - 54
  - 55
  - 56
  - 57
  - 58
  - 59
  - 60
24. Craig P, Dieppe P, Macintyre S, *et al*. Developing and evaluating complex interventions: the new Medical Research Council guidance. *BMJ* 2008,**337**:a1655.
25. Kothmann E, Danjoux G, Owen SJ, *et al*. Reliability of the anaerobic threshold in cardiopulmonary exercise testing of patients with abdominal aortic aneurysms. *Anaesthesia* 2009,**64**:9-13.
26. EVAR trial participants: Endovascular aneurysm repair versus open repair in patients with abdominal aortic aneurysm (EVAR trial 1): randomised controlled trial. *Lancet* 2005,**365**:2179-2186.
27. Prinssen M, Buskens E, Blankensteijn JD, *et al*. Quality of life endovascular and open AAA repair. Results of a randomised trial. *Eur J Vasc Endovasc Surg* 2004,**27**:121-127.
28. Adamson SJ, Bland JM, Hay EM, *et al*. Patients' preferences within randomised trials: systematic review and patient level meta-analysis. *BMJ* 2008,**337**:a1864.
29. Rognmo Ø, Moholdt T, Bakken H, *et al*. Cardiovascular risk of high- versus moderate-intensity aerobic exercise in coronary heart disease patients. *Circulation* 2012,**126**:1436-1440.
30. Moholdt TT, Amundsen BH, Rustad LA, *et al*. Aerobic interval training versus continuous moderate exercise after coronary artery bypass surgery: a randomized study of cardiovascular effects and quality of life. *Am Heart J* 2009,**158**:1031-1037.
31. Moholdt T, Aamot IL, Granøien I, *et al*. Aerobic interval training increases peak oxygen uptake more than usual care exercise training in myocardial infarction patients: a randomized controlled study. *Clin Rehabil* 2012,**26**:33-44.
32. Poole DC, Ward SA, Gardner GW, *et al*. Metabolic and respiratory profile of the upper limit for prolonged exercise in man. *Ergonomics* 1988,**31**:1265-1279.
33. Borg GA. Psychophysical bases of perceived exertion. *Med Sci Sports Exerc* 1982,**14**:377-381.
34. Myers J, Dalman R, Hill B. Exercise, Vascular Health, and Abdominal Aortic Aneurysms. *J Clin Exerc Physiol* 2012,**1**:1-8.
35. Neuffer PD. The effect of detraining and reduced training on the physiological adaptations to aerobic exercise training. *Sports Med* 1989,**8**:302-320.
36. Stanley DM, Williams SE, Cumming JL. Preliminary validation of a single-item measure of exercise enjoyment: The Exercise Enjoyment Scale. *J Sport Exerc Psych* 2009,**31**:S138-139.
37. Kendzierski D, DeCarlo KJ. Physical Activity Enjoyment Scale: Two validation studies. *J Sport Exerc Psych* 1991,**13**:50-64.
38. Myers JN, White JJ, Narasimhan B, *et al*. Effects of exercise training in patients with abdominal aortic aneurysm: preliminary results from a randomized trial. *J Cardiopulm Rehabil Prev* 2010,**30**:374-383.
39. Moll FL, Powell JT, Fraedrich G, *et al*. Management of abdominal aortic aneurysms clinical practice guidelines of the European society for vascular surgery. *Eur J Vasc Endovasc Surg* 2011,**41 Suppl 1**:S1-S58.
40. Hirsch AT, Haskal ZJ, Hertzner NR, *et al*. ACC/AHA 2005 Practice Guidelines for the management of patients with peripheral arterial disease (lower extremity, renal, mesenteric, and abdominal aortic). *Circulation* 2006,**113**:e463-654.

- 1
- 2
- 3 41. Best PJ, Tajik AJ, Gibbons RJ, *et al*. The safety of treadmill exercise stress
- 4 testing in patients with abdominal aortic aneurysms. *Ann Intern Med*
- 5 1998,**129**:628-631.
- 6
- 7 42. Thompson PD, Franklin BA, Balady GJ, *et al*. Exercise and acute
- 8 cardiovascular events placing the risks into perspective: a scientific statement
- 9 from the American Heart Association Council on Nutrition, Physical Activity,
- 10 and Metabolism and the Council on Clinical Cardiology. *Circulation*
- 11 2007,**115**:2358-2368.
- 12
- 13 43. Bennett-Guerrero E, Welsby I, Dunn TJ, *et al*. The use of a postoperative
- 14 morbidity survey to evaluate patients with prolonged hospitalization after
- 15 routine, moderate-risk, elective surgery. *Anesth Analg* 1999,**89**:514-519.
- 16
- 17 44. Grocott MP, Browne JP, Van der Meulen J, *et al*. The Postoperative Morbidity
- 18 Survey was validated and used to describe morbidity after major surgery. *J*
- 19 *Clin Epidemiol* 2007,**60**:919-928.
- 20
- 21 45. Curtis L: Unit Costs of Health and Social Care 2012. PRSSU. University of
- 22 Kent.
- 23
- 24 46. Department of Health: NHS reference costs: financial year 2011 to 2012:
- 25 November 2012.
- 26
- 27

## Figure legends

Figure 1 Study flowchart

1  
2  
3  
4  
5  
6  
7  
8  
9  
10  
11  
12  
13  
14  
15  
16  
17  
18  
19  
20  
21  
22  
23  
24  
25  
26  
27  
28  
29  
30  
31  
32  
33  
34  
35  
36  
37  
38  
39  
40  
41  
42  
43  
44  
45  
46  
47  
48  
49  
50  
51  
52  
53  
54  
55  
56  
57  
58  
59  
60

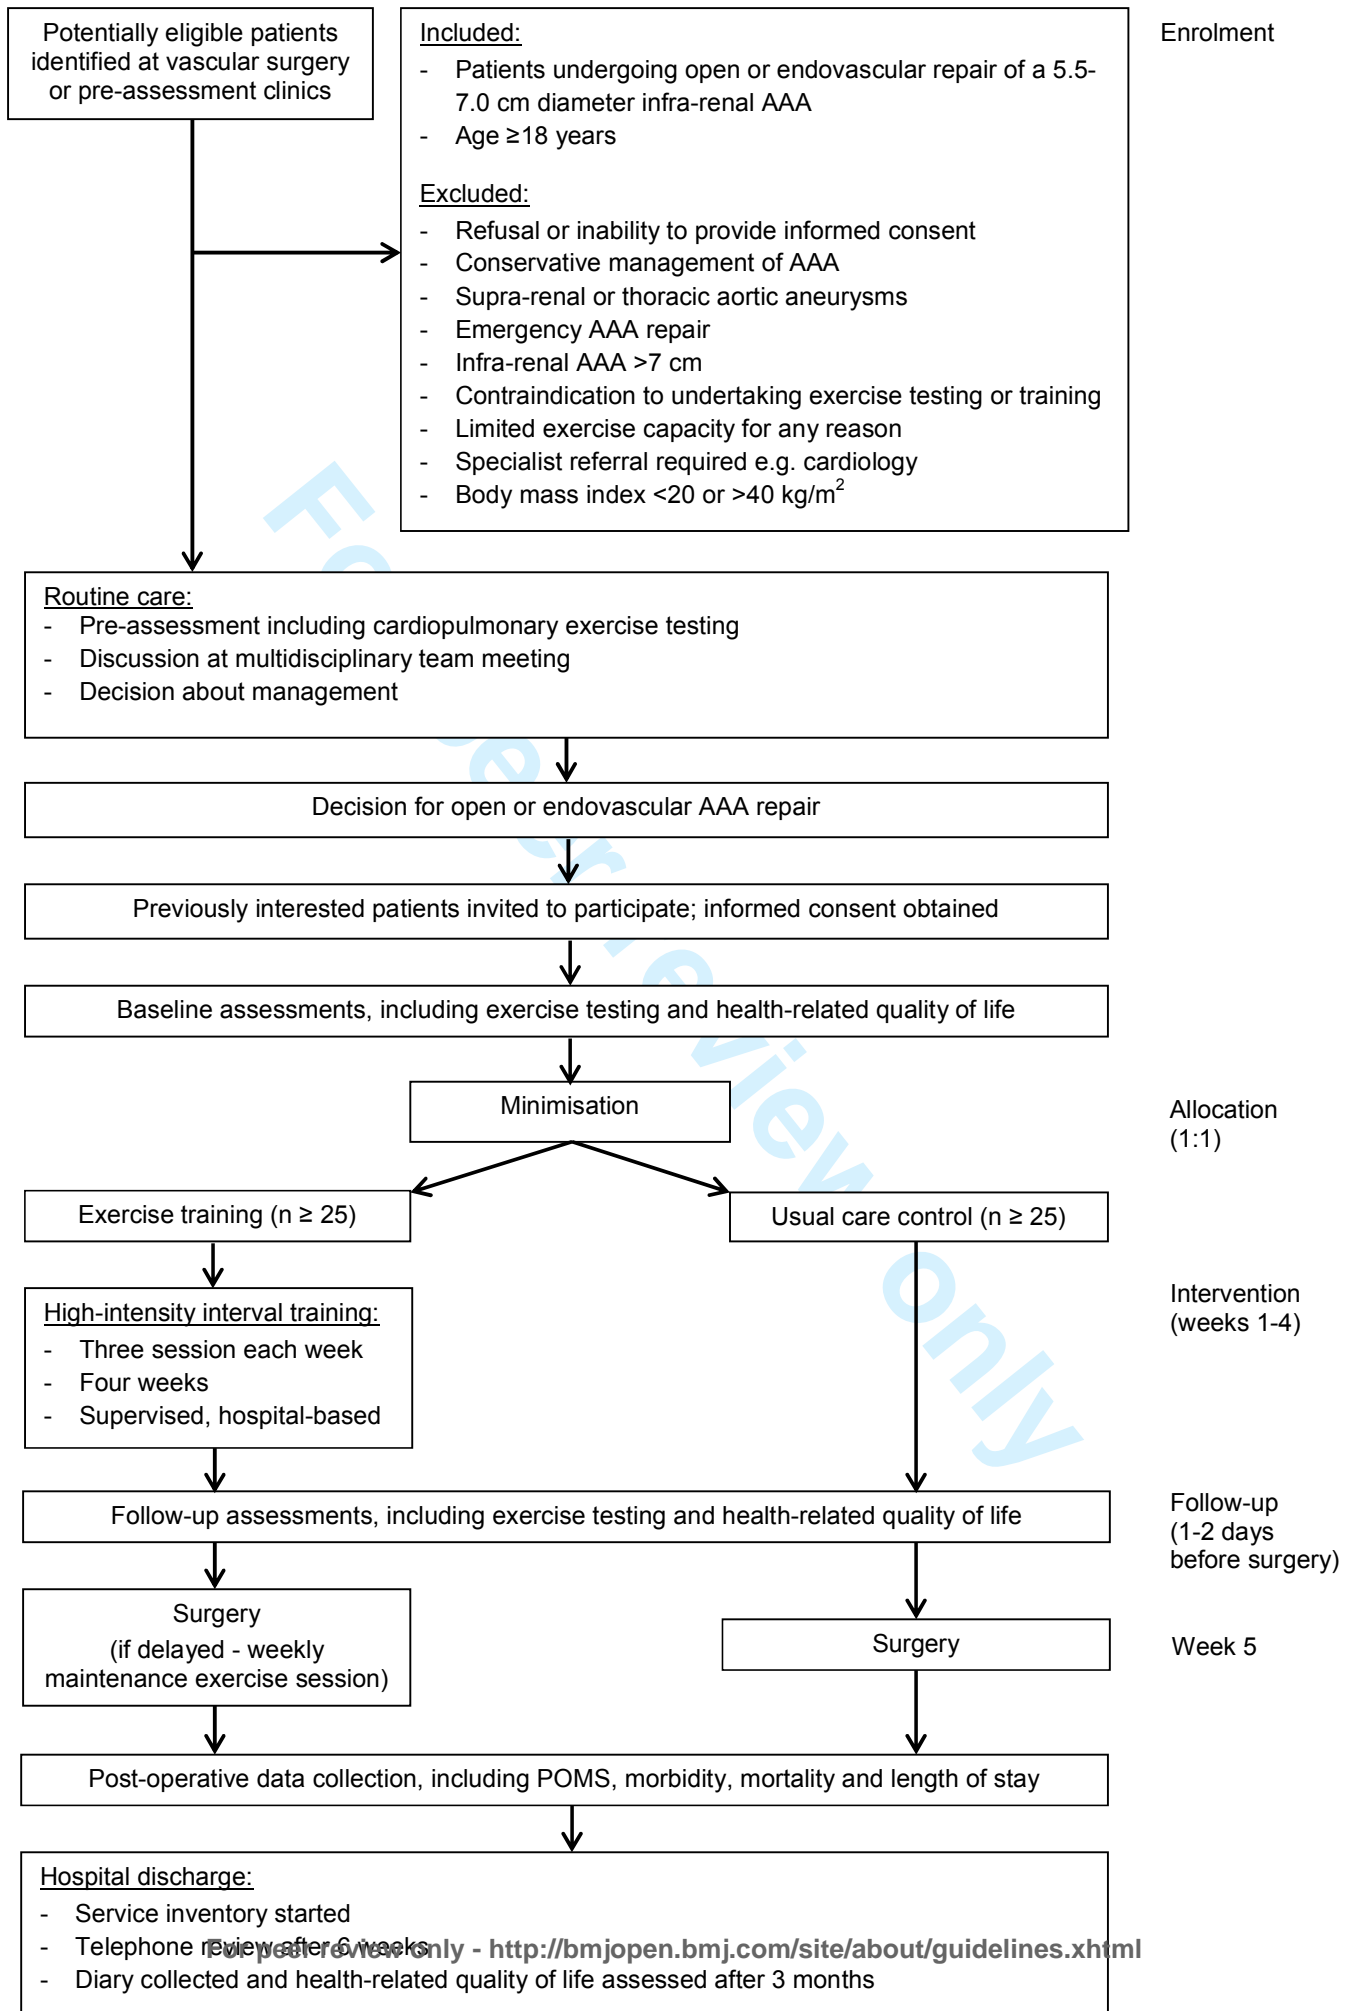

1  
2  
3  
4  
5  
6  
7  
8  
9  
10  
11  
12  
13  
14  
15  
16  
17  
18  
19  
20  
21  
22  
23  
24  
25  
26  
27  
28  
29  
30  
31  
32  
33  
34  
35  
36  
37  
38  
39  
40  
41  
42  
43  
44  
45  
46  
47  
48  
49  
50  
51  
52  
53  
54  
55  
56  
57  
58  
59  
60

**HIT-AAA: Study Data Collection Form (Case Report Form)**

Participant study number: \_\_\_\_\_ Participant initials: \_\_\_\_\_

Site: South Tees / York / Sheffield

Paperwork checklist (please tick):

- Written informed consent provided? [ ]
- Patient information sheet and copy of consent to patient [ ]
- Patient information sheet and copy of consent in medical notes [ ]
- Place study sticker in patient's notes [ ]
- Complete GP letters informing of patient's entry into study [ ]

For peer review only

## 1. Baseline data (week 0)

Date.....

|                                                               |                                                                      |                       |                                    |
|---------------------------------------------------------------|----------------------------------------------------------------------|-----------------------|------------------------------------|
| <b>Age</b>                                                    | years                                                                | <b>Body mass</b>      | kg                                 |
| <b>Sex</b>                                                    |                                                                      | <b>Stature</b>        | cm                                 |
| <b>Body mass index</b>                                        | kg/m <sup>2</sup>                                                    | <b>Size of AAA</b>    | cm                                 |
| <b>Baseline observations</b>                                  | BP:                                                                  | RHR:                  | Sats: %                            |
| <b>Date of vascular pre-assessment clinic</b>                 |                                                                      |                       |                                    |
| <b>METs score</b>                                             |                                                                      |                       |                                    |
| <b>ASA score</b>                                              |                                                                      |                       |                                    |
| <b>Modified revised cardiac risk index (answer yes or no)</b> |                                                                      |                       |                                    |
|                                                               | Ischaemic heart disease                                              |                       |                                    |
|                                                               | Congestive cardiac failure                                           |                       |                                    |
|                                                               | Cerebrovascular disease                                              |                       |                                    |
|                                                               | Insulin for diabetes mellitus                                        |                       |                                    |
|                                                               | Creatinine > 177 µmol/l                                              |                       |                                    |
|                                                               | Age >70 years                                                        |                       |                                    |
|                                                               | Abnormal electrocardiogram                                           |                       |                                    |
|                                                               | Rhythm (other than sinus)                                            |                       |                                    |
| <b>Quantify abnormality</b>                                   |                                                                      |                       |                                    |
|                                                               | Uncontrolled blood pressure (systolic >160 mmHg, diastolic >90 mmHg) |                       |                                    |
| <b>Other co-morbidities</b>                                   | Chronic obstructive pulmonary disease                                |                       |                                    |
|                                                               | Asthma                                                               |                       |                                    |
|                                                               | Other respiratory disease                                            |                       |                                    |
|                                                               | Smoker (also tick if quit within 6 months)                           |                       |                                    |
|                                                               | Diabetes mellitus                                                    |                       |                                    |
|                                                               | Peripheral arterial disease                                          |                       |                                    |
|                                                               | Gastrointestinal disease                                             |                       |                                    |
|                                                               | Other (free text):                                                   |                       |                                    |
| <b>Baseline creatinine</b><br>(µmol/l)                        |                                                                      |                       |                                    |
| <b>Baseline eGFR</b><br>(ml/min)                              |                                                                      |                       |                                    |
| <b>Baseline haemoglobin</b><br>(mg/dL)                        |                                                                      |                       |                                    |
| <b>Medications</b><br>(please circle)                         | ACE inhibitor                                                        | Statin                | Beta-blocker                       |
|                                                               | Calcium channel blocker                                              | Antiplatelet<br>A C D | Angiotensin II receptor antagonist |
|                                                               | NSAIDs                                                               | Diuretic              | Insulin                            |
|                                                               | Warfarin                                                             | Oral hypoglycaemics   |                                    |

A, aspirin; AAA, abdominal aortic aneurysm; ACE, angiotensin converting enzyme; ASA, American Society of Anesthesiologists; BP, blood pressure; C, clopidogrel; D, dipyridamole; eGFR, estimated glomerular filtration rate; MET, metabolic equivalents; NSAID, non-steroidal anti-inflammatory drug; RHR, resting heart rate.

Preference for exercise group (before randomisation)

Yes / No



## 2. Baseline cardiopulmonary exercise test data (week 0)

Date.....

| Data                                                                   | Results or comment |
|------------------------------------------------------------------------|--------------------|
| Body mass                                                              | kg                 |
| Resting blood pressure                                                 | mmHg               |
| Resting heart rate                                                     | beats/min          |
| VO <sub>2</sub> at rest : Indexed                                      | ml/kg/min          |
| Absolute                                                               | ml/min             |
| Anaerobic threshold Indexed                                            | ml/kg/min          |
| Absolute                                                               | ml/min             |
| Power output at anaerobic threshold                                    | W                  |
| Anaerobic threshold achieved (please circle)                           | Yes No             |
| VE/VCO <sub>2</sub> at anaerobic threshold                             |                    |
| VO <sub>2</sub> peak Indexed                                           | ml/kg/min          |
| Absolute                                                               | ml/min             |
| Power output at VO <sub>2</sub> peak                                   | W                  |
| O <sub>2</sub> pulse at the start of exercise                          | ml/beat            |
| Peak O <sub>2</sub> pulse                                              | ml/beat            |
| Peak heart rate                                                        | beats/min          |
| Peak blood pressure                                                    | mmHg               |
| VE at rest                                                             | l/min              |
| Peak VE                                                                | l/min              |
| Inducible ischaemia (please circle)                                    | Yes No             |
| Heart rate at ischaemia onset                                          | beats/min          |
| Ischaemia before / after anaerobic threshold (please circle)           | Before After       |
| Oscillatory breathing pattern? (please circle)                         | Yes No             |
| Lowest exercise O <sub>2</sub> saturation                              | %                  |
| Oxygen Uptake Efficiency Slope (VO <sub>2</sub> ml/min / log VE l/min) |                    |
| Peak rating of perceived exertion                                      |                    |
| Peak respiratory exchange ratio                                        |                    |
| Reason for termination                                                 |                    |

VCO<sub>2</sub>, carbon dioxide production; VE, volume of expired air; VO<sub>2</sub>, oxygen consumption.

1  
2  
3  
4  
5  
6  
7  
8  
9  
10  
11  
12  
13  
14  
15  
16  
17  
18  
19  
20  
21  
22  
23  
24  
25  
26  
27  
28  
29  
30  
31  
32  
33  
34  
35  
36  
37  
38  
39  
40  
41  
42  
43  
44  
45  
46  
47  
48  
49  
50  
51  
52  
53  
54  
55  
56  
57  
58  
59  
60

**3. Multi-disciplinary team data**

Date.....

|                      |         |             |     |
|----------------------|---------|-------------|-----|
| Type of surgery:     | Open    | EVAR        |     |
| Complexity of EVAR:  | Complex | Non-complex |     |
| Post-op destination: | Ward    | HDU         | ITU |
| Dated for surgery?   | Yes     | No          |     |

Date if known: \_\_\_\_\_

For peer review only

#### 4. Week 5 cardiopulmonary exercise test data

Date.....

| Data                                                                   | Results or comment |
|------------------------------------------------------------------------|--------------------|
| Body mass                                                              | kg                 |
| Resting blood pressure                                                 | mmHg               |
| Resting heart rate                                                     | beats/min          |
| VO <sub>2</sub> at rest : Indexed                                      | ml/kg/min          |
| Absolute                                                               | ml/min             |
| Anaerobic threshold Indexed                                            | ml/kg/min          |
| Absolute                                                               | ml/min             |
| Power output at anaerobic threshold                                    | W                  |
| Anaerobic threshold achieved (please circle)                           | Yes No             |
| VE/VCO <sub>2</sub> at anaerobic threshold                             |                    |
| VO <sub>2</sub> peak Indexed                                           | ml/kg/min          |
| Absolute                                                               | ml/min             |
| Power output at VO <sub>2</sub> peak                                   | W                  |
| O <sub>2</sub> pulse at the start of exercise                          | ml/beat            |
| Peak O <sub>2</sub> pulse                                              | ml/beat            |
| Peak heart rate                                                        | beats/min          |
| Peak blood pressure                                                    | mmHg               |
| VE at rest                                                             | l/min              |
| Peak VE                                                                | l/min              |
| Inducible ischaemia (please circle)                                    | Yes No             |
| Heart rate at ischaemia onset                                          | beats/min          |
| Ischaemia before / after anaerobic threshold (please circle)           | Before After       |
| Oscillatory breathing pattern? (please circle)                         | Yes No             |
| Lowest exercise O <sub>2</sub> saturation                              | %                  |
| Oxygen Uptake Efficiency Slope (VO <sub>2</sub> ml/min / log VE l/min) |                    |
| Peak rating of perceived exertion                                      |                    |
| Peak respiratory exchange ratio                                        |                    |
| Reason for termination                                                 |                    |

VCO<sub>2</sub>, carbon dioxide production; VE, volume of expired air; VO<sub>2</sub>, oxygen consumption.

**Preference for exercise group (following intervention)** Yes / No

**Week 5 Size of AAA (exercise group only)** cm

If surgery delayed by >4 weeks please complete repeat exercise test sheet (p. 9)

**5. Intra-operative data**

Date of admission: \_\_\_\_\_

Date of intervention: \_\_\_\_\_

Days since last exercise test: \_\_\_\_\_ Test number: **1** **2** **3****Intra-operative details**

|                                                           |                                                            |                                    |
|-----------------------------------------------------------|------------------------------------------------------------|------------------------------------|
| <b>Type of repair (circle)</b>                            | Open repair                                                | EVAR                               |
| <b>Open repair only:</b>                                  |                                                            |                                    |
| <b>Surgical data</b>                                      | Aortic cross-clamp time                                    | min                                |
|                                                           | Use of supra-renal clamp (please circle)                   | Yes / No<br>min                    |
| Incision type (please circle)                             | Vertical / Transverse                                      |                                    |
| Other information (please circle)                         | Hostile abdomen<br>Bi-iliac graft<br>Inflammatory aneurysm |                                    |
| <b>Anaesthetic data for open repair or EVAR</b>           |                                                            |                                    |
| Type of anaesthetic<br><br>Tick or comment as appropriate | General anaesthetic                                        |                                    |
|                                                           | Spinal                                                     |                                    |
|                                                           | Spinal catheter                                            |                                    |
|                                                           | Epidural                                                   | Lumbar/Thoracic<br>Intraop/ postop |
|                                                           | Combined spinal epidural anaesthesia                       |                                    |
|                                                           | Local anaesthesia alone                                    |                                    |
| Estimated blood loss                                      |                                                            | ml                                 |
| Urine output                                              |                                                            | ml                                 |
| Intra-operative fluids                                    | Crystalloids                                               | ml                                 |
|                                                           | Colloids                                                   | ml                                 |
|                                                           | Cell salvaged blood                                        | ml                                 |
|                                                           | Packed cells                                               | Units                              |
|                                                           | Fresh frozen plasma                                        | Units                              |
|                                                           | Platelets                                                  | pools                              |
|                                                           | Cryoprecipitate                                            | Units                              |
| Any intraoperative CVS support (circle)                   | Bolus                                                      | Infusion                           |
| Any intraoperative vasodilators (circle)                  | Bolus                                                      | Infusion                           |
| Requirement for CVS support at end of operation           | Yes / No                                                   | Comment:                           |
| Post-operative care facility (circle)                     | Ward / HDU / ITU                                           |                                    |

CVS, cardiovascular system; EVAR, endovascular aneurysm repair; HDU, high-dependency unit; ITU, intensive treatment unit.

1  
2  
3  
4  
5  
6  
7  
8  
9  
10  
11  
12  
13  
14  
15  
16  
17  
18  
19  
20  
21  
22  
23  
24  
25  
26  
27  
28  
29  
30  
31  
32  
33  
34  
35  
36  
37  
38  
39  
40  
41  
42  
43  
44  
45  
46  
47  
48  
49  
50  
51  
52  
53  
54  
55  
56  
57  
58  
59  
60

Any intraoperative adverse events:

---

---

---

Any adverse events between operation and midnight on day 0:

---

---

---

Any other comments:

---

---

---

Signature of intraoperative data collector: \_\_\_\_\_

For peer review only

1  
2  
3  
4  
5  
6  
7  
8  
9  
10  
11  
12  
13  
14  
15  
16  
17  
18  
19  
20  
21  
22  
23  
24  
25  
26  
27  
28  
29  
30  
31  
32  
33  
34  
35  
36  
37  
38  
39  
40  
41  
42  
43  
44  
45  
46  
47  
48  
49  
50  
51  
52  
53  
54  
55  
56  
57  
58  
59  
60

**6. Postoperative Morbidity** (free text below) – including date

(a) Cardiac event

(b) Respiratory event

(c) Other event

**Post-operative Morbidity Survey (POMS) data to be collected from end of surgery until discharge from hospital**

**7. Discharge Data**

Date of discharge: \_\_\_\_\_

Date of death (write NA if not applicable): \_\_\_\_\_

Cause of death (write NA if not applicable): \_\_\_\_\_

Total hospital length of stay (nearest half day): \_\_\_\_\_

Days on ITU (write NA if not applicable): \_\_\_\_\_

Days on HDU (write NA if not applicable): \_\_\_\_\_

Date when POMS = 0: \_\_\_\_\_

## 8. Additional cardiopulmonary exercise test data

Date.....

| Data                                                                   | Results or comment |
|------------------------------------------------------------------------|--------------------|
| Body mass                                                              | kg                 |
| Resting blood pressure                                                 | mmHg               |
| Resting heart rate                                                     | beats/min          |
| VO <sub>2</sub> at rest : Indexed                                      | ml/kg/min          |
| Absolute                                                               | ml/min             |
| Anaerobic threshold Indexed                                            | ml/kg/min          |
| Absolute                                                               | ml/min             |
| Power output at anaerobic threshold                                    | W                  |
| Anaerobic threshold achieved (please circle)                           | Yes No             |
| VE/VCO <sub>2</sub> at anaerobic threshold                             |                    |
| VO <sub>2</sub> peak Indexed                                           | ml/kg/min          |
| Absolute                                                               | ml/min             |
| Power output at VO <sub>2</sub> peak                                   | W                  |
| O <sub>2</sub> pulse at the start of exercise                          | ml/beat            |
| Peak O <sub>2</sub> pulse                                              | ml/beat            |
| Peak heart rate                                                        | beats/min          |
| Peak blood pressure                                                    | mmHg               |
| VE at rest                                                             | l/min              |
| Peak VE                                                                | l/min              |
| Inducible ischaemia (please circle)                                    | Yes No             |
| Heart rate at ischaemia onset                                          | beats/min          |
| Ischaemia before / after anaerobic threshold (please circle)           | Before After       |
| Oscillatory breathing pattern? (please circle)                         | Yes No             |
| Lowest exercise O <sub>2</sub> saturation                              | %                  |
| Oxygen Uptake Efficiency Slope (VO <sub>2</sub> ml/min / log VE l/min) |                    |
| Peak rating of perceived exertion                                      |                    |
| Peak respiratory exchange ratio                                        |                    |
| Reason for termination                                                 |                    |

VCO<sub>2</sub>, carbon dioxide production; VE, volume of expired air; VO<sub>2</sub>, oxygen consumption.

| Postop day (0 = day of operation)<br>Days run from 0000 – 2359                                                                                                                                                                                                                                                                                              | 1 | 2 | 3 | 4 | 5 | 6 | 7 |
|-------------------------------------------------------------------------------------------------------------------------------------------------------------------------------------------------------------------------------------------------------------------------------------------------------------------------------------------------------------|---|---|---|---|---|---|---|
| <i>Put a tick in the box for each system if any criteria are fulfilled.<br/>All criteria are changes in comparison with preoperative status.</i>                                                                                                                                                                                                            |   |   |   |   |   |   |   |
| <b>Pulmonary:</b> New requirement for supplemental oxygen or other respiratory support.<br>(Include even if institutional practise or preventative for initial postoperative period)                                                                                                                                                                        |   |   |   |   |   |   |   |
| <b>Infectious:</b> Currently on antibiotics or temperature >38 °C in the last 24 hr.<br>(Include antibiotic prophylaxis)                                                                                                                                                                                                                                    |   |   |   |   |   |   |   |
| <b>Renal:</b> Presence of oliguria (500 ml/24 hr),<br>OR increased serum creatinine (>30% from pre-op level) [baseline Cr x 1.3 = _____ µmol/L]<br>OR urinary catheter in place.                                                                                                                                                                            |   |   |   |   |   |   |   |
| <b>Gastro-intestinal:</b> Unable to tolerate an enteral diet for any reason, including nausea, vomiting,<br>and abdominal distension, or use of antiemetic.                                                                                                                                                                                                 |   |   |   |   |   |   |   |
| <b>Cardiovascular system:</b> Diagnostic tests or therapy within the last 24 h for any of the following:<br>New myocardial infarction or ischaemia,<br>Hypotension (requiring pharmacological therapy or fluid therapy >200 ml/hr),<br>Atrial or ventricular arrhythmias,<br>Cardiogenic pulmonary oedema,<br>Thrombotic event (requiring anticoagulation). |   |   |   |   |   |   |   |
| <b>Central nervous system:</b> Presence of new focal deficit, confusion, delirium or coma.                                                                                                                                                                                                                                                                  |   |   |   |   |   |   |   |
| <b>Wound:</b> Wound dehiscence requiring surgical exploration or drainage of pus from the operation<br>wound.                                                                                                                                                                                                                                               |   |   |   |   |   |   |   |
| <b>Haematological:</b> Requirement for any of the following within the last 24 hr: packed erythrocytes,<br>platelets, fresh-frozen plasma, or cryoprecipitate.                                                                                                                                                                                              |   |   |   |   |   |   |   |
| <b>Pain:</b> New postoperative pain significant enough to require strong opioids or regional analgesia.<br>(score until epidural is removed, strong opioids are IV morphine or oxycodone/oxycotin)                                                                                                                                                          |   |   |   |   |   |   |   |
| <b>Data collector initials</b>                                                                                                                                                                                                                                                                                                                              |   |   |   |   |   |   |   |

Please provide comments overleaf detailing:

- Any significant morbidity not described above.
- Reasons why patient still in hospital if no morbidity described above.

If patient discharged, please complete discharge data on page eight of this form



1  
2  
3  
4  
5  
6  
7  
8  
9  
10  
11  
12  
13  
14  
15  
16  
17  
18  
19  
20  
21  
22  
23  
24  
25  
26  
27  
28  
29  
30  
31  
32  
33  
34  
35  
36  
37  
38  
39  
40  
41  
42  
43  
44  
45  
46  
47  
48  
49

Day      Post-operative comments (include initials of data collector)

|       |       |
|-------|-------|
| ..... | ..... |
| ..... | ..... |
| ..... | ..... |
| ..... | ..... |
| ..... | ..... |
| ..... | ..... |
| ..... | ..... |
| ..... | ..... |
| ..... | ..... |
| ..... | ..... |
| ..... | ..... |
| ..... | ..... |
| ..... | ..... |
| ..... | ..... |
| ..... | ..... |
| ..... | ..... |
| ..... | ..... |
| ..... | ..... |
| ..... | ..... |
| ..... | ..... |
| ..... | ..... |
| ..... | ..... |
| ..... | ..... |

For peer review only



**High-intensity Interval exercise Training before Abdominal Aortic Aneurysm repair (HIT-AAA): protocol for a randomised controlled feasibility trial**

|                                 |                                                                                                                                                                                                                                                                                                                                                                                                                                                                                                                                                                                                                                                                                                                                                         |
|---------------------------------|---------------------------------------------------------------------------------------------------------------------------------------------------------------------------------------------------------------------------------------------------------------------------------------------------------------------------------------------------------------------------------------------------------------------------------------------------------------------------------------------------------------------------------------------------------------------------------------------------------------------------------------------------------------------------------------------------------------------------------------------------------|
| Journal:                        | <i>BMJ Open</i>                                                                                                                                                                                                                                                                                                                                                                                                                                                                                                                                                                                                                                                                                                                                         |
| Manuscript ID:                  | bmjopen-2013-004094.R1                                                                                                                                                                                                                                                                                                                                                                                                                                                                                                                                                                                                                                                                                                                                  |
| Article Type:                   | Protocol                                                                                                                                                                                                                                                                                                                                                                                                                                                                                                                                                                                                                                                                                                                                                |
| Date Submitted by the Author:   | 07-Dec-2013                                                                                                                                                                                                                                                                                                                                                                                                                                                                                                                                                                                                                                                                                                                                             |
| Complete List of Authors:       | Tew, Garry; University of York, Department of Health Sciences<br>Weston, Matthew; Teesside University, School of Social Sciences & Law<br>Kothmann, Elke; James Cook University Hospital, Department of Academic Anaesthesia<br>Batterham, Alan; Teesside University, Health and Social Care Institute<br>Gray, Joanne; Northumbria University, Faculty of Health & Life Sciences<br>Kerr, Karen; Northern General Hospital, Department of Anaesthesia<br>Martin, Denis; Teesside University, Health and Social Care Institute<br>Nawaz, Shah; Northern General Hospital, Sheffield Vascular Institute<br>Yates, David; York Hospital, Department of Anaesthesia<br>Danjoux, Gerard; James Cook University Hospital, Department of Academic Anaesthesia |
| <b>Primary Subject Heading</b>: | Sports and exercise medicine                                                                                                                                                                                                                                                                                                                                                                                                                                                                                                                                                                                                                                                                                                                            |
| Secondary Subject Heading:      | Anaesthesia, Cardiovascular medicine, Health services research, Rehabilitation medicine                                                                                                                                                                                                                                                                                                                                                                                                                                                                                                                                                                                                                                                                 |
| Keywords:                       | Aortic aneurysm, abdominal, Vascular diseases, Exercise, Rehabilitation, Physical fitness, Feasibility studies                                                                                                                                                                                                                                                                                                                                                                                                                                                                                                                                                                                                                                          |
|                                 |                                                                                                                                                                                                                                                                                                                                                                                                                                                                                                                                                                                                                                                                                                                                                         |

SCHOLARONE™  
Manuscripts

1  
2  
3 **High-intensity Interval exercise Training before Abdominal Aortic**  
4 **Aneurysm repair (HIT-AAA): protocol for a randomised controlled**  
5 **feasibility trial**  
6  
7

8 Garry A Tew<sup>1</sup>  
9 Email: [garry.tew@york.ac.uk](mailto:garry.tew@york.ac.uk)  
10

11 Matthew Weston<sup>2</sup>  
12 Email: [m.weston@tees.ac.uk](mailto:m.weston@tees.ac.uk)  
13

14 Elke Kothmann<sup>3</sup>  
15 Email: [elke.kothmann@stees.nhs.uk](mailto:elke.kothmann@stees.nhs.uk)  
16

17 Alan M Batterham<sup>4</sup>  
18 Email: [a.batterham@tees.ac.uk](mailto:a.batterham@tees.ac.uk)  
19

20 Joanne Gray<sup>5</sup>  
21 Email: [joanne3.gray@northumbria.ac.uk](mailto:joanne3.gray@northumbria.ac.uk)  
22

23 Karen Kerr<sup>6</sup>  
24 Email: [Karen.Kerr2@sth.nhs.uk](mailto:Karen.Kerr2@sth.nhs.uk)  
25

26 Denis Martin<sup>4</sup>  
27 Email: [d.martin@tees.ac.uk](mailto:d.martin@tees.ac.uk)  
28

29 Shah Nawaz<sup>7</sup>  
30 Email: [Shah.Nawaz@sth.nhs.uk](mailto:Shah.Nawaz@sth.nhs.uk)  
31

32 David Yates<sup>8</sup>  
33 Email: [david.yates@york.nhs.uk](mailto:david.yates@york.nhs.uk)  
34

35 Gerard Danjoux<sup>3\*</sup>  
36 \* Corresponding author  
37 Email: [Gerard.danjoux@stees.nhs.uk](mailto:Gerard.danjoux@stees.nhs.uk)  
38

39 1 York Trials Unit, Department of Health Sciences, University of York, York, YO10  
40 5DD, UK  
41

42 2 School of Social Sciences & Law, Teesside University, Middlesbrough, TS1 3BA,  
43 UK  
44

45 3 Department of Academic Anaesthesia, James Cook University Hospital,  
46 Middlesbrough, TS4 3BW, UK  
47

48 4 Health and Social Care Institute, Teesside University, Middlesbrough, TS1 3BA,  
49 UK  
50

51 5 Faculty of Health & Life Sciences, Northumbria University, Benton, Newcastle-  
52 Upon-Tyne, NE7 7XA, UK  
53  
54  
55  
56  
57  
58  
59  
60

1  
2  
3 6 Department of Anaesthesia, Northern General Hospital, Sheffield Teaching  
4 Hospitals Foundation Trust, Sheffield, S5 7AU, UK  
5

6 7 Sheffield Vascular Institute, Northern General Hospital, Sheffield, UK, S5 7AU, UK  
7

8 8 Department of Anaesthesia, York Hospital, York, YO31 8HE, UK  
9

10  
11 **Keywords**

12  
13 Aortic aneurysm, abdominal; Vascular diseases; Exercise; Rehabilitation; Physical  
14 fitness; Feasibility studies; Randomized controlled trial  
15

16 Abstract: 298  
17  
18  
19  
20  
21  
22  
23  
24  
25  
26  
27  
28  
29  
30  
31  
32  
33  
34  
35  
36  
37  
38  
39  
40  
41  
42  
43  
44  
45  
46  
47  
48  
49  
50  
51  
52  
53  
54  
55  
56  
57  
58  
59  
60

## Abstract

### Introduction

In patients with large abdominal aortic aneurysm (AAA), open surgical or endovascular aneurysm repair procedures are often used to minimise the risk of aneurysm-related rupture and death; however, aneurysm repair itself carries high risk. Low cardiopulmonary fitness is associated with an increased risk of early post-operative complications and death following elective AAA repair. Therefore, fitness should be enhanced before aneurysm repair. High-intensity interval exercise training (HIT) is a potent, time-efficient strategy for enhancing cardiopulmonary fitness. Here, we describe a feasibility study for a definitive trial of a pre-operative HIT intervention to improve post-operative outcomes in patients undergoing elective AAA repair.

### Methods and analysis

A minimum of fifty patients awaiting elective repair of a 5.5-7.0 cm infra-renal AAA will be allocated by minimisation to HIT or usual care control in a 1:1 ratio. Patients allocated to HIT will complete three hospital-based exercise sessions per week, for 4 weeks. Each session will include 2 or 4 minutes of high-intensity stationary cycling followed by the same duration of easy cycling or passive recovery, repeated until a total of 16 minutes of high-intensity exercise is accumulated. Outcomes to be assessed before randomisation and 24 to 48 hours before aneurysm repair include cardiopulmonary fitness, maximum AAA diameter, and health-related quality of life. In the post-operative period, we will record destination (ward or critical care unit), organ-specific morbidity, mortality, and the durations of critical care and hospital stay. Twelve weeks after discharge, participants will be interviewed to re-assess quality of life and determine post-discharge healthcare utilisation. The costs associated with the exercise intervention and healthcare utilisation will be calculated.

### Ethics and dissemination

Ethics approval was secured through Sunderland Research Ethics Committee. The findings of the trial will be disseminated through peer-reviewed journals, and national and international presentations.

Trial registration: Current Controlled Trials ISRCTN09433624

## Background

Major non-cardiac surgery is associated with substantial peri-operative risk; the overall mortality rate appears low (c. 1-2%), but the number of operations performed (c. 250 million per annum worldwide) results in a large absolute number of deaths [1]. Moreover, post-operative complications occur up to 5 times as frequently [1], with survivors experiencing physical limitations and reduced life expectancy [2, 3]. Identification of individuals in this 'at risk' group for death and complications creates a significant challenge to clinicians in the pre-operative period. Objective assessment of cardiopulmonary fitness in the pre-operative period utilising cardiopulmonary exercise testing (CPET) is the established gold standard across the UK. It has a developing evidence base in predicting adverse outcome across a variety of high-risk surgical procedures [4], and this has contributed substantially to clinicians' understanding of the impact of poor cardiopulmonary fitness.

There is a convincing physiological rationale linking improved cardiopulmonary fitness to a reduction in adverse outcome following surgery. The surgical stress response involves neuroendocrine, metabolic and inflammatory effects leading to a catabolic state and increased basal metabolic rate (up to three times pre-operative values [5, 6]). A patient with adequate cardiopulmonary fitness is able meet these extra demands post-operatively, but patients with inadequate fitness levels might be unable to cope, leading to tissue hypoxia and peri-operative complications. Approximately half of patients presenting for intra-abdominal surgery do not have the pre-requisite fitness, on objective exercise testing, to be deemed 'low risk' for peri-operative complications [7]. It is intuitive that improving fitness levels in the pre-operative period will translate to reduced death and complications following major surgery.

Little is known about the impact of pre-operative exercise training on post-operative outcomes. In a recent systematic review [8], the authors concluded that pre-operative exercise therapy prior to cardiac or abdominal surgery results in a reduced hospital length of stay and reduced post-operative morbidity, but that more research is required on the impact and long-term benefits. However, of the five studies identified that focused on cardiac and abdominal surgery, four involved inspiratory muscle training with pulmonary complications as the primary outcome. Clearly, this intervention improves respiratory muscle function, which might reduce post-operative pulmonary morbidity. However, this form of training is unlikely to favourably influence the wider range of sequelae of the surgical stress response. Only one study focused on the effect of a more general pre-surgery exercise training intervention. Arthur *et al.* [9] reported a reduction in median hospital length of stay of 1-day (vs. usual care control) following coronary artery bypass graft surgery with an 8-10 week exercise training programme plus education reinforcement and social support. The intervention involved 30 minutes of aerobic interval training, performed twice a week at 40-70% of functional capacity.

We believe that a programme of research is needed now to evaluate the benefits of pre-operative exercise training in patients undergoing elective non-cardiothoracic surgery. Abdominal aortic aneurysm (AAA) is a frequently lethal disease occurring in ~5% of males aged 50-79 years [10]. Annually 5,000-6,000 surgical repairs are performed across the UK [11], making this an ideal homogenous high-risk target

1  
2  
3 population. The incidence of co-morbid disease is higher than other age-matched  
4 surgical populations: cardiac disease 60-70%, respiratory disease 40-50%, long-term  
5 smoking 50-80%, renal disease 10-12% and diabetes 10-12% [12]. Anecdotal  
6 observation from >1000 CPETs confirms that this population is also substantially  
7 less fit than other age-matched surgical populations. Findings from two recent  
8 publications also support the adverse impact of poor fitness on outcome in patients  
9 undergoing AAA repair [13, 14].  
10

11  
12 Intervention for AAA can be performed by either open or endovascular repair (EVAR),  
13 with a current ratio nationally of 55:45 in favour of EVAR [11]. 30-day mortality for  
14 open surgery in the UK in 2008 was 7-8% [12]. Earlier studies from the USA [15] and  
15 the Netherlands [16] reported major post-operative morbidity of 30-40%.  
16 Endovascular treatment is less invasive, with mortality and cardio-respiratory  
17 morbidity rates of 2-3% [11, 12] and 10-15% [15, 16], respectively. For open surgery  
18 the UK mortality rate was higher than expected with respect to comparable countries,  
19 prompting the publication of a Quality Improvement Programme document with the  
20 explicit remit of standardising management to improve outcome [11]. Encouragingly  
21 such standardisation has brought about a significant 30-day mortality benefit for both  
22 procedures in the Vascular Society's most recent publication: 4.3% and 0.9% for  
23 open AAA and EVAR respectively [17]. Despite this there remains significant room  
24 for improvement. No information is routinely available on non-fatal complications,  
25 which are up to five times more prevalent than mortality and known to affect patient  
26 quality of life and overall life expectancy on hospital discharge. In addition, a key  
27 omission from the guidance is evidence or advice in relation to improving  
28 preoperative fitness, despite the fact that one of the main conclusions of the EVAR-2  
29 study was that vascular teams should be focusing on techniques to improve patient  
30 fitness preoperatively [18].  
31  
32  
33

34 The proposed benefits of exercise "prehabilitation" are mediated by increases in  
35 cardiopulmonary fitness. Two pilot randomised controlled trials undertaken by our  
36 research team have documented improvements in cardiopulmonary fitness following  
37 moderate-intensity endurance exercise training in patients under surveillance for a  
38 small AAA. Kothmann *et al.* [19] reported a 10% increase in the oxygen consumption  
39 at the ventilatory threshold (a sub-maximal marker of cardiopulmonary fitness of  
40 prognostic significance) after 6 weeks of moderate-intensity cycling exercise  
41 performed for 30 minutes twice weekly. Tew *et al.* [20] observed a  $2.5 \text{ mL}\cdot\text{kg}^{-1}\cdot\text{min}^{-1}$   
42 ( $\sim 20\%$ ) improvement in the ventilatory threshold after 12 weeks of moderate-  
43 intensity cycling and treadmill walking exercise performed for 35-45 minutes thrice  
44 weekly. A recent review of preoperative exercise training [21] proposed a research  
45 agenda, with future directions including the role of prehabilitation in improving fitness  
46 levels prior to major surgery, the use of robust study designs with appropriate  
47 outcome measures, and evaluations of the effects of high-intensity interval exercise  
48 training (HIT) as a model for which there is extensive evidence of benefit in other  
49 subject groups, including heart failure patients [22]. A recent literature review by  
50 Giraud in cardiac rehabilitation [23] concluded that when compared to moderate  
51 intensity training, HIT has a similar safety profile (low absolute risk) and produces  
52 greater and more time-efficient improvements in fitness. For the current proposal HIT  
53 therefore represents a particularly attractive approach, as the time-window for  
54 intervention once a patient has been identified for aneurysm repair might be as short  
55  
56  
57  
58  
59  
60

1  
2  
3 as 4-6 weeks [11]. Therefore, an intervention with the potential for more rapid fitness  
4 benefits is preferable.  
5

6  
7 Our programme of work is aligned to the Medical Research Council's guidance for  
8 developing and evaluating complex interventions [24]. Given the limited extent of the  
9 evidence base, a feasibility study is clearly required to inform a subsequent definitive  
10 trial. The MRC guidance stresses that crucial feasibility work is often absent or  
11 insufficient, with 'definitive' trials undermined by acceptability, adherence, and  
12 delivery of the intervention, recruitment and retention issues, and smaller than  
13 expected effect sizes.  
14

15 We are conducting a feasibility study to explore the potential benefits of a 4-week  
16 HIT programme, delivered prior to surgery for AAA repair. This will be stationary  
17 cycle-based, in-hospital and undertaken 3 times per week.  
18

## 19 Aims

### 20 *1. Explore potential primary outcomes for a subsequent definitive randomised 21 controlled trial (RCT)*

22 The physiological rationale suggests a causal pathway between adaptations  
23 consequent to exercise training and reduced mortality and morbidity. Potential  
24 primary outcomes for a definitive trial therefore include 30-day mortality, morbidity  
25 [Post-Operative Morbidity Survey (POMS) score], health-related quality of life  
26 (HRQOL), hospital length of stay, costs and cost-effectiveness  
27  
28  
29

### 30 *2. Examine the suitability of the exercise training for a subsequent definitive RCT*

31 High-intensity interval training shows much promise as an efficacious, time-efficient  
32 and also enjoyable intervention for improving fitness. However, it has not been  
33 employed with AAA patients awaiting repair.  
34  
35

### 36 *3. Examine the willingness of patients to be randomised and explore potential patient 37 preferences*

38 In RCTs, patients might have strong treatment preferences resulting in a refusal to  
39 be randomised, affecting the generalisability of results. Or, they might agree to be  
40 randomised but suffer from 'resentful demoralisation' if they end up in the non-  
41 preferred arm of the trial, leading to poor adherence. This issue requires examination  
42 in a feasibility study, as the preference effects for exercise vs. control in this patient  
43 population are unknown. Theoretically, patients might have a preference for the  
44 exercise arm due to a belief in the benefits. Notwithstanding the patient information  
45 provided, others might be fearful of engaging in high-intensity exercise prior to  
46 surgery and therefore might exhibit a preference for the control arm. These issues  
47 could affect the success of a definitive trial.  
48  
49

## 50 Objectives

### 51 *(Aim 1)*

52 Define the characteristics of the potential outcome measures. Specifically,  
53 1. Define the distribution (e.g. log-normal, Poisson etc. for, e.g., length of hospital  
54 stay) and estimate the variability for the potential primary outcome measures to  
55 inform sample size planning for a subsequent definitive trial.  
56  
57  
58  
59  
60



2. Estimate the effect size (intervention minus control) for each potential outcome variable (point estimate and its uncertainty). This information reflects the effectiveness of the intervention and the 'noise' in the measurement (precision of the measure) and together with the other information will inform the choice of primary outcome for a subsequent trial.

3. Assess the ease of data collection for each potential primary outcome (including participant and clinician burden, assessed via qualitative data).

*(Aim 2)*

This will specifically include; objective fitness changes, safety, enjoyment, delivery and adherence of the exercise intervention

*(Aim 3)*

Examine the strength of patient preferences for either the intervention or control arms (qualitative data). These data will be elicited from all patients assessed as eligible, to determine the extent to which preferences affect both recruitment and adherence.

## Methods/Design

### Study Design

Three-centre, two-arm, parallel-group, randomised, controlled feasibility study. The study flowchart is shown in Figure 1. Ethics approval was secured through Sunderland Research Ethics Committee (reference 13/NE/0116) in May 2013.

---

#### Figure 1 Flowchart of the study

AAA, abdominal aortic aneurysm; EVAR, endovascular aneurysm repair; POMS, post-operative morbidity survey

---

### Study Population and Recruitment Routes

Patients being assessed for surgery for a 5.5-7.0 cm AAA will be approached via vascular surgical or preoperative assessment clinics at recruiting institutions. Potential recruits will be approached at this stage by a study investigator and, if interested, provided a study information sheet. Where an investigator is not available, a study information letter will be sent to the patient requesting permission to contact them about the study.

### Sample Size

The sample size for a feasibility study should be adequate to estimate critical parameters with sufficient precision. Herein, the critical outcome is adherence to the exercise intervention. A patient will be deemed compliant if they complete  $\geq 75\%$  of the scheduled sessions; i.e. 9/12 sessions for a 4-week intervention, plus all once-weekly maintenance sessions if surgery is delayed. We define success with respect to adherence as a lower limit of 0.67 (c. 2/3 of the population) for the 90%

1  
2  
3 confidence interval for the proportion of the exercise group complying with the  
4 intervention. We estimate that  $\geq 85\%$  of the exercise group will be 'compliers' based  
5 on our pilot studies in small AAA patients [19, 20]. A 90% confidence interval for a  
6 single proportion around a value of 0.85 is 0.68 to 0.95 with  $n=25$  patients. Using a  
7 1:1 allocation ratio we require 25 patients per trial arm, 50 in total.  
8

9  
10 A minimum of 50 participants will therefore be recruited to the study.

11  
12 Approximately 150 repairs of AAA  $< 7.0$  cm are performed across our three clinical  
13 institutions annually. Assuming 30% attrition for specialist referral and lack of pre-  
14 requisite fitness, approximately 176 potential patients will be available in our 21-  
15 month recruitment time-window.  
16

### 17 **Clinical Assessment**

18  
19 The clinical assessment processes described are based on routine practice at the  
20 recruiting institutions. All patients who are being considered for an elective AAA  
21 repair will attend a preoperative assessment clinic. Here, an individual's clinical risk  
22 profile for surgery will be established using history of relevant co-morbidities,  
23 physical examination and CPET. Evidence-based optimisation of medication will be  
24 performed at this stage.  
25  
26

27  
28 After risk profiling, a patient's treatment options are discussed in a vascular  
29 multidisciplinary team meeting comprising input from surgery, anaesthesia and  
30 radiology. A risk-benefit assessment is undertaken based on a nationally agreed  
31 care pathway [11]. There are three possible outcomes: open aneurysm repair, EVAR  
32 or conservative management (i.e. when surgical risk is deemed too great or the  
33 patient elects not to proceed). The most appropriate postoperative care facility is  
34 also determined.  
35

36 **Eligibility criteria** – see figure 1

### 37 **Recruitment**

38  
39 Patients who express an interest at clinic, or who are sent a study information letter,  
40 will be contacted by telephone inviting participation (if no exclusion criteria). With  
41 verbal consent, the baseline assessment will be scheduled.  
42  
43  
44

### 45 **Baseline assessment**

46  
47 Written informed consent will be obtained. Participants will confirm their medical  
48 history and current medication and undergo a physical examination. Baseline  
49 measurements will then be recorded, including:  
50

- 51 • Patient characteristics (sex, stature, body mass, body mass index)
- 52 • Resting pulse, blood pressure and oxygen saturations
- 53 • Maximum AAA diameter via trans-abdominal ultrasound (not if an ultrasound  
54 scan has been performed within the previous 8 weeks)
- 55 • Cardiopulmonary fitness via CPET. The CPET data will be used to identify the  
56 intensity at which the patients in the exercise group will initiate training. We  
57 have previously demonstrated the reliability of CPET in AAA patients [25].  
58  
59  
60

1  
2  
3 Testing will be performed according to an agreed protocol across all recruiting  
4 sites (available on request).

- 5 • HRQOL using the Medical Outcomes Study SF-36 version 2 questionnaire  
6 and the EuroQol EQ-5D-5L questionnaire, both of which have been used  
7 previously in AAA patients [18, 26, 27].
- 8 • Participant preference for 'exercise' training or 'usual care' – prior to  
9 randomisation to explore patient preferences and subsequent changes in  
10 attitude consequent to the intervention. This design permits the exploration of  
11 the effects of preference in the analysis [28].  
12

## 13 14 **Randomisation**

15  
16 After baseline assessment, patients will be randomly allocated 1:1 to exercise or  
17 usual care control (no supervised exercise), using minimisation to ensure balance  
18 across trial arms for important prognostic factors. We do not list these factors here,  
19 to avoid any risk of the staff recruiting patients being able to decipher the allocation  
20 sequence. Full details of the minimisation process will be published in a separate  
21 document with restricted access. The study statistician (AB) will conduct the  
22 minimisation process remotely via e-mail.  
23

## 24 25 **Exercise Intervention (weeks 1-4)**

26  
27 The exercise intervention period will be for 4 weeks leading up to surgery. Where  
28 possible, participants (exercise and control) will have a surgical date booked for the  
29 following week (week 5).  
30

31  
32 The exercise programme is broadly based on that which has been shown to be safe  
33 and effective for improving cardiopulmonary fitness in patients undergoing cardiac  
34 rehabilitation [22, 29-31]. Patients allocated to the exercise group will complete three  
35 sessions of hospital-based HIT per week, throughout the 4-week pre-operative  
36 period. Exercise will be stationary cycling (Optibike Med, Ergoline, Germany), which  
37 has been reported to be a preferred mode for vascular patients (unpublished  
38 observations). Each session will begin and end with 10 and 5 minutes of unloaded  
39 cycling, respectively. In the first week of training, the main body of each session will  
40 involve eight 2-minute bouts of cycling, interspersed with 2-minute periods of  
41 unloaded cycling or "off-the-bike" slow walking, depending on patient preference. All  
42 of the "work" bouts during the very first session will be performed at the power output  
43 associated with ventilatory threshold determined on baseline CPET (i.e. the  
44 demarcation between moderate and heavy exercise intensity domains [32]). In  
45 subsequent sessions, power output will be gradually manipulated until the patient  
46 reports a perceived exertion of 6-7 on Borg's CR-10 scale [33] (i.e. hard to very hard)  
47 at the end of each work interval. However, for safety reasons, the intensity of  
48 exercise will be made easier if systolic blood pressure exceeds 180 mm Hg [34] or if  
49 heart rate exceeds 95% of the maximum observed on baseline CPET. In weeks 2-4,  
50 and for variety, the patient will be allowed to choose between doing four 4-minute  
51 work bouts or eight 2-minute bouts as the main body of each exercise session, both  
52 with a 1:1 work-to-rest ratio. Thus, each session will last ~45 minutes regardless of  
53 patient choice, which will include 16 minutes of high-intensity exercise. An  
54 experienced physiotherapist will supervise each session and record power output,  
55 perceived exertion, and blood pressure (manual sphygmomanometer) at the end of  
56  
57  
58  
59  
60

1  
2  
3 each work interval. Heart rate will be recorded continuously at 5 s intervals through  
4 the entire exercise session (Polar RS400, Kempele, Finland). The collection of such  
5 data will permit a detailed quantification of the exercise intervention. Patients who do  
6 not undergo surgery in week 5 will complete one HIT session per week up until  
7 surgery to maintain fitness [35]. All adverse events will be recorded.  
8

9  
10 Information in relation to *participant's perceived enjoyment of exercise* is important to  
11 monitor. This is of relevance in adherence to the programme, whilst providing  
12 valuable information for planning a definitive study. We therefore plan to assess:

- 13 1. Changes in enjoyment of exercise both within sessions and throughout the  
14 programme. Perceived or likely enjoyment can change prior, during and after  
15 exercise as a consequence of a variety of factors e.g. anxiety, enjoyment,  
16 fatigue. We therefore plan to ask participants to assess enjoyment/perceived  
17 enjoyment of exercise prior to commencing, during and 20 minutes after  
18 exercise using a simple validated rating scale [36]. This will take <30 seconds  
19 to administer on each occasion and will be done during the first (baseline), 3<sup>rd</sup>,  
20 6<sup>th</sup>, 9<sup>th</sup> and 12<sup>th</sup> sessions to track changes consequent to the programme.  
21
- 22 2. Overall enjoyment of the exercise programme will be assessed during the  
23 week 5 assessment, using the validated multi-dimensional physical activity  
24 enjoyment scale (PACES) [37]. This will be 2-3 days following completion of  
25 the overall programme, allowing participants reflection and evaluation time  
26 (see week 5 assessment below).  
27

28 Two experienced exercise scientists will be responsible for ensuring treatment  
29 fidelity of the exercise programme (GT, MW).  
30

### 31 **Safety Considerations**

32  
33  
34 There are two main safety considerations regarding running a programme of HIT in  
35 patients with AAA disease:

- 36 1. Cardiac risk – as previously outlined 60-70% of individuals with AAA disease  
37 suffer from comorbid cardiac disease. The baseline assessment of clinical risk  
38 profile and CPET will be instrumental in assessing this risk in detail, under the  
39 stress of exercise, at the outset. A recent review by Guiraud *et al.* [23]  
40 highlights the safety of HIT in patients with underlying coronary disease, heart  
41 failure and patients at risk of cardiovascular disease. We are reassured by  
42 their conclusion which states "there is growing scientific evidence that HIT  
43 presents little danger for selected stable cardiac patients, provided that the  
44 prescribed protocols are respected".  
45

46  
47 In the event of an adverse cardiac event we will have the following in place:

- 48 • Staff experienced and Intermediate Life Support-trained
- 49 • Resuscitation equipment and oxygen immediately available
- 50 • Hospital cardiac arrest team fully informed of time and place of training  
51 sessions
- 52 • Participants requiring further assessment will be transferred to the  
53 Accident and Emergency Unit within the relevant hospital.  
54

55  
56 All institutions have Cardiology expertise immediately available on site.  
57  
58  
59  
60

1  
2  
3 2. Risk of AAA expansion or rupture – an intuitive concern regarding exercise  
4 testing and training in patients with aneurysms is of excessive rises in double-  
5 product (systolic blood pressure × heart rate) evoking aneurysm expansion  
6 and rupture. However, the available evidence suggests that these concerns  
7 are unfounded. For example, no aneurysm ruptures or excessive aneurysm  
8 growth rates were reported in any of the three studies of moderate-intensity  
9 exercise training in patients with early AAA disease (from >4000 exercise  
10 sessions; [19, 20, 38]), two of which were conducted at our institutions [19,  
11 20]. Further unpublished data from our institutions indicate no ruptures  
12 from >1300 maximal exercise tests in patients with large asymptomatic AAA  
13 being considered for elective aneurysm repair. Moreover, through national  
14 networked connections, and other relevant publications, we believe this  
15 position of safety to be correct for >5000 maximal exercise tests. This position  
16 is also supported by the European guidelines for the management of AAA  
17 disease, which state that physical activity is not associated with AAA growth  
18 [39], as well as the ACC/AHA Practice Guidelines for the Management of  
19 Patients with Peripheral Vascular Disease [40], which suggest that AAA  
20 patients should not be fearful of vigorous activity. The only reported adverse  
21 event we are aware of came from the patient series of Best *et al.* [41] where a  
22 rupture occurred 12 hours after maximal exercise testing in a patient with a  
23 6.1 cm AAA, yielding a rupture rate for this study of 0.4%. However, the  
24 causal relationship between exercise and rupture is difficult to establish given  
25 the 12-hour intervening period.  
26  
27  
28

29  
30 It would therefore appear that the risk of AAA growth or rupture is very low in  
31 the context of exercise training for individuals with both small and large  
32 aneurysmal disease. This risk would appear to be <1:5,000. When balanced  
33 against national perioperative mortality/morbidity figures available for surgery  
34 in the UK at present, we feel that this represents clear benefit in favour of  
35 undertaking the preoperative exercise as set out.  
36

37 In the event of a suspected AAA rupture patients would immediately be  
38 transferred to the Accident and Emergency department for prompt further  
39 evaluation. All clinical institutions have on-site vascular teams able to  
40 immediately respond to such a situation.  
41

42  
43 Despite this we see risk minimisation in this context as our primary concern and  
44 will implement the following control measures:

- 45 • Thorough pre-participation screening
- 46 • Exclusion of high-risk patients
- 47 • Hospital-based exercise testing and training
- 48 • Exercise sessions supervised by experienced cardiac physiotherapists  
49 trained in Intermediate Life Support
- 50 • Exercise sessions performed >3 hours after waking given the higher  
51 frequency of cardiovascular events during the morning hours [42]
- 52 • Prompt evaluation of prodromal symptoms
- 53 • Resuscitation equipment and oxygen immediately available
- 54 • Exercise termination if a patient has signs/symptoms suggestive of distress,  
55 cardiac or AAA adverse event  
56  
57  
58  
59  
60

- Reduction in exercise intensity if a patient has systolic blood pressure rise to >180 mm Hg, or heart rate >95% of their maximum (from baseline CPET)

### Safety Governance

In line with Medical Research Council guidance we have developed the following safety governance structure for the study:

- Data Monitoring and Ethics Committee (DMEC) – the DMEC comprises three academics/clinicians with appropriate expertise who are independent from the running of the study. Any serious adverse events will be reported to and fully investigated by the DMEC. The DMEC will make recommendations to the Trial Steering Committee with regards to any ethical or safety concerns they may have.
- Trial Steering Committee (TSC) – this committee is led by the Chief Investigator (CI), with representation from all collaborating clinical and academic institutions. A lay representative will be approached to sit on the committee. The TSC will meet 3 times per year to discuss all elements of study progress and conduct.
- TSC Safety Committee – a formal study safety committee has been established and comprises 3 study investigators, including the CI. This group has the remit of ensuring all appropriate safety standards are in place prior to study commencement, and during the course of the research.

All adverse and serious adverse events will be managed within the strict governance arrangements of the study sponsor and participating clinical institutions.

### **Week 5 assessments**

During week 5 it is anticipated that participants will undergo AAA repair. In the same week, but 1-2 days prior to surgery, assessments will be performed in all participants. The outcomes, which are primarily aimed at investigating the safety and effectiveness of the exercise intervention compared with usual care, will include:

- Cardiopulmonary fitness via CPET (to assess fitness changes from baseline)
- Maximum AAA diameter via trans-abdominal ultrasound (to establish safety of exercise in relation to aneurysm growth)
- HRQOL questionnaires
- PACES assessment for overall exercise programme enjoyment (exercise intervention group only)

Due to logistical reasons it is anticipated that not all participants will undergo surgery in week 5. This will mainly be due to a temporary lack of hospital beds for admission preoperatively, or critical care post-operatively. In this situation, surgery will be rescheduled, where possible, within 4 weeks. A repeat CPET will be undertaken in patients whose surgery is delayed >4 weeks, to ensure we have an accurate assessment of pre-operative fitness in all patients. A CPET assessment of those patients who have performed one high-intensity training session per week from week 5 onwards will provide further valuable information of the dose-response nature of high-intensity training in this population.

An overview of data to be collected for this aspect of the study can be seen on the study Case Report Form (see Additional file 1).

## Perioperative period

Participants will undergo open or endovascular aneurysm repair as determined at the multidisciplinary team meeting. All perioperative care will be at the discretion of the vascular teams (as per usual practice) who will be blinded to group allocation. Perioperative data will be collected as seen in Additional file 1.

Post-operatively an investigator blinded to group allocation will determine the following:

- Destination – ward or critical care unit
- Postoperative Morbidity Survey Score (POMS) – a validated tool used to assess organ-specific morbidity in the post-operative period [43, 44]. Scores will be collected daily.
- Mortality
- Length of critical care and hospital stay

## Post-discharge follow-up

At hospital discharge patients will be asked to keep a service receipt inventory to record treatment/care requirements for a 12-week period to inform the resource utilisation analysis. Participants will be interviewed via telephone at 6 weeks, with a follow-up appointment at 12 weeks after discharge to assess:

- HRQOL
- Resource utilisation
- Hospital readmissions, with diagnosis, within 12 weeks of initial discharge

## Analysis Plan of Quantitative Study

Adherence with the exercise intervention will be analysed as described in the sample size justification, above, via the confidence interval for a single proportion. For the potential primary outcomes for a subsequent definitive trial, the likely effect of the exercise intervention will be estimated via standard intervention minus control comparisons (accounting for the type of variable and its distributional properties). We will examine the disposition of the 90% confidence interval for the observed effect to the minimum clinically important difference for each variable. Inasmuch as this is a feasibility study, these comparisons are exploratory and are intended to inform the subsequent trial. Data management will be performed according to the governance arrangements of the institutions involved in the project.

## Analysis of Health Economics and Cost Effectiveness

A prospective economic evaluation will be rehearsed to develop and refine methods for a subsequent definitive trial. The main focus will be on how to accurately identify, quantify and value the additional costs of delivering the intervention and the potential resource implications versus usual care post-operatively and post-discharge. The costing approach will incorporate a broad analytical perspective (National Health Service and Social Services), which will help to detect cost-shifting between sectors. Resources utilised in the exercise group will be identified in terms of capital equipment and staff time. A staff-reported health economics questionnaire has been

1  
2  
3 developed to facilitate this (available upon request). Post-operative resource use will  
4 also be explored for all participants in terms of bed days (including critical care bed  
5 days). Post-discharge resource use for all treatment/care related to AAA surgery will  
6 be assessed retrospectively for 12 weeks by piloting the use of a self-report Service  
7 Receipt Inventory (patient diary). This will facilitate the development of a reliable and  
8 valid tool to capture resource use. Appropriate unit costs to be applied to resource  
9 use will be identified. These will be sourced from a combination of local costings and  
10 national databases [45, 46]. All costs will be combined to rehearse the methods for  
11 total health and social care cost estimation in a subsequent definitive trial.  
12  
13

14 The methods to estimate an incremental cost-effectiveness ratio for exercise versus  
15 usual care in terms of Quality Adjusted Life Years will be rehearsed (using EQ-5D 5L  
16 administered at baseline and 12 weeks post discharge). In particular, issues relevant  
17 for sensitivity analysis will be explored to help understand how best to deal with  
18 statistical imprecision and other uncertainties in the full trial. For example, data will  
19 be bootstrapped to account for the expected skewness evident in economic cost  
20 data. The data collected as part of this feasibility study could be used to inform  
21 subsequent pre-trial modelling.  
22  
23

### 24 **Analysis of Participant Interviews**

25  
26 We aim to explore participants' post-discharge experience. From a critical realism  
27 perspective, semi-structured interviews will cover quality of life, function and attitudes  
28 to exercise including fear.  
29

30  
31 Sixteen participants will be recruited using purposive sampling and the following  
32 criteria: men and women; a range of ages; both study groups; both forms of  
33 aneurysm repair; and a range of experiences post-discharge. The interviews (1 hour  
34 with a research nurse; audio-recorded and transcribed) will take place in the hospital  
35 at the 12-week post-discharge visit. Transcripts will be analysed thematically using  
36 quantitative and diary data for triangulation.  
37

38 Qualitative data (brief interview) will also be collected from all participants (and from  
39 clinical outcome assessors where relevant) to assess the ease of data collection for  
40 each potential primary outcome (participant and clinician burden), to evaluate the  
41 perceived enjoyment of the exercise intervention, and to examine the strength of  
42 patient preferences for either the intervention or control arms. These data will be  
43 elicited from all patients assessed as eligible, to help determine the extent to which  
44 preferences affect both recruitment and adherence.  
45  
46

### 47 **Criteria for success**

48  
49 A subsequent definitive RCT will be deemed feasible if:

- 50 1. An appropriate primary outcome variable is defined;
- 51 2. The lower limit of the 90% confidence interval for the proportion of the exercise  
52 intervention group complying with the intervention is  $\geq 67\%$ . A patient is defined as  
53 having complied with the intervention if he completes  $\geq 75\%$  of the scheduled  
54 sessions;
- 55 3. Patient preferences are not so strong that they result in the conclusion that an  
56 RCT is not a feasible design.  
57  
58  
59  
60



## Dissemination strategy

The dissemination strategy for this research will be to inform a wide range of local, national and international audiences about the results and conclusions. It must however be remembered as part of this strategy that the current proposal is for preliminary work aimed at defining a subsequent definitive clinical trial.

1. Health professionals – we aim to publish our research in journals that cover the relevant medical specialties and with preference for those that deposit publications in open access databases to increase free dissemination. In addition, we aim to present this research at appropriate national and international conferences.

2. Users – from this perspective we aim in the first instance to collaborate with our patient representatives (from advisory and steering groups) and local experts in patient and public involvement to best facilitate user dissemination. We plan to write a specific news piece that will be forwarded to appropriate groups and organisations.

3. Service managers – as an exploratory study it is unlikely that results from this study will directly influence commissioning processes in the short term. More we will engage with appropriate primary and secondary care groups to discuss support for our proposed definitive study leading on from this research.

## Trial status

Start date: 1 August 2013

Expected end date: 30 May 2015

Expected publication date: 1 January 2016

Status at time of submission of this article: approvals obtained, but not yet recruiting

Funder: UK National Institute of Health Research - Research for Patient Benefit Programme (PB-PG-1111-26068)

## List of abbreviations used (if any)

|       |                                           |
|-------|-------------------------------------------|
| AAA   | abdominal aortic aneurysm                 |
| CPET  | cardiopulmonary exercise testing          |
| EVAR  | endovascular aneurysm repair              |
| HIT   | high-intensity interval exercise training |
| HRQOL | health-related quality of life            |
| PACES | physical activity enjoyment scale         |
| POMS  | post-operative morbidity survey           |
| RCT   | randomised controlled trial               |

## Acknowledgements

This study is funded by the National Institute for Health Research (NIHR) under its Research for Patient Benefit (RfPB) Programme (Grant Reference Number PB-PG-1111-26068). The views expressed are those of the authors and not necessarily those of the NHS, the NIHR or the Department of Health. The following individuals are acknowledged for making a substantial contribution to the development of this study: Louise Cawthorn, Susan Ward and Esther Carr. The primary trial sponsor is South Tees NHS Foundation Trust (Marton Road, Middlesbrough, TS4 3BW).

## Authors' contributions

GT drafted the manuscript and contributed to the design of the study. Original study concept was by GD and AB. All co-authors contributed to the design of the study. GD is Chief Investigator for the project. EK is Principal Investigator (PI) at James Cook University Hospital (South Tees), SN is PI at Northern General Hospital (Sheffield) and DY is PI at York Hospital. All authors contributed to the critical revision of the manuscript for important intellectual content and read and approved the final manuscript.

## Competing interests

The authors declare that they have no competing interests.

## References

1. Pearse RM, Holt PJ, Grocott MP: **Managing perioperative risk in patients undergoing elective non-cardiac surgery**. *BMJ* 2011, **343**:d5759.
2. Head J, Ferrie JE, Alexanderson K, et al.: **Diagnosis-specific sickness absence as a predictor of mortality: the Whitehall II prospective cohort study**. *BMJ* 2008, **337**:a1469.
3. Khuri SF, Henderson WG, DePalma RG, et al, Participants in the VA National Surgical Quality Improvement Program: **Determinants of long-term survival after major surgery and the adverse effect of postoperative complications**. *Ann Surg* 2005, **242**(3):326-341.
4. Hennis PJ, Meale PM, Grocott MP: **Cardiopulmonary exercise testing for the evaluation of perioperative risk in non-cardiopulmonary surgery**. *Postgrad Med J* 2011, **87**(1030):550-557.
5. Viale JP, Annat GJ, Ravat FM, et al: **Oxygen uptake and mixed venous oxygen saturation during aortic surgery and the first three postoperative hours**. *Anesth Analg* 1991, **73**(5):530-535.
6. Older P, Smith R: **Experience with the preoperative invasive measurement of haemodynamic, respiratory and renal function in 100 elderly patients scheduled for major abdominal surgery**. *Anaesth Intensive Care* 1988, **16**(4):389-395.
7. Wilson RJ, Davies S, Yates D, et al: **Impaired functional capacity is associated with all-cause mortality after major elective intra-abdominal surgery**. *Br J Anaesth* 2010, **105**(3):297-303.
8. Valkenet K, van de Port IG, Dronkers JJ, et al: **The effects of preoperative exercise therapy on postoperative outcome: a systematic review**. *Clin Rehabil* 2011, **25**(2):99-111.
9. Arthur HM, Daniels C, McKelvie R, et al: **Effect of a preoperative intervention on preoperative and postoperative outcomes in low-risk patients awaiting elective coronary artery bypass graft surgery. A randomized, controlled trial**. *Ann Intern Med* 2000, **133**(4):253-262.
10. Lederle F, Johnson G, Wilson S, et al: **Abdominal aortic aneurysm in women**. *J Vasc Surg* 2001, **34**(1):122-126.
11. **National Abdominal Aortic Aneurysm Quality Improvement Programme Interim report** [<http://www.aaaqip.com/files/aaaqip-interim-report-new-final-printed-version-23-06-11.pdf>]
12. **Second Vascular Surgery Database Report 2008** [<http://www.esvs.org/sites/default/files/file/Vascunet/Vascunet%20report%20008.pdf>]
13. Hartley RA, Pichel AC, Grant SW, Hickey GL, Lancaster PS, Wisely NA, McCollum CN, Atkinson D: **Preoperative cardiopulmonary exercise testing and risk of early mortality following abdominal aortic aneurysm repair**. *Br J Surg* 2012, **99**(11):1539-1546.
14. Prentis JM, Trenell MI, Jones DJ, Lees T, Clarke M, Snowden CP: **Submaximal exercise testing predicts perioperative hospitalization after aortic aneurysm repair**. *J Vasc Surg* 2012, **56**(6):1564-1570.
15. Elkouri S, Gloviczki P, McKusick MA, Panneton JM, Andrews J, Bower TC, Noel AA, Harmsen WS, Hoskin TL, Cherry K: **Perioperative complications and early outcome after endovascular and open surgical repair of abdominal aortic aneurysms**. *J Vasc Surg* 2004, **39**(3):497-505.

16. Prinssen M, Verhoeven EL, Buth J, et al, Dutch Randomized Endovascular Aneurysm Management (DREAM) Trial Group: **A randomized trial comparing conventional and endovascular repair of abdominal aortic aneurysms.** *N Engl J Med* 2004, **351**(16):1607-1618.
17. **Outcomes after Elective Repair of Infra-renal Abdominal Aortic Aneurysm** [<http://www.vascularsociety.org.uk/vascular/wp-content/uploads/2012/11/VSGBI-Mortality-Report.pdf>]
18. EVAR trial participants: **Endovascular aneurysm repair and outcome in patients unfit for open repair of abdominal aortic aneurysm (EVAR trial 2): randomised controlled trial.** *Lancet* 2005, **365**(9478):2187-2192.
19. Kothmann E, Batterham AM, Owen SJ, et al: **Effect of short-term exercise training on aerobic fitness in patients with abdominal aortic aneurysms: a pilot study.** *Br J Anaesth* 2009, **103**(4):505-510.
20. Tew GA, Moss J, Crank H, et al: **Endurance exercise training in patients with small abdominal aortic aneurysm: a randomized controlled pilot study.** *Arch Phys Med Rehabil* 2012, **93**(12):2148-2153.
21. Jack S, West M, Grocott MP: **Perioperative exercise training in elderly subjects.** *Best Pract Res Clin Anaesthesiol* 2011, **25**(3):461-472.
22. Wisløff U, Støylen A, Loennechen JP, Bruvold M, et al: **Superior cardiovascular effect of aerobic interval training versus moderate continuous training in heart failure patients: a randomized study.** *Circulation* 2007, **115**(24):3086-3094.
23. Guiraud T, Nigam A, Gremeaux V, et al: **High-intensity interval training in cardiac rehabilitation.** *Sports Med* 2012, **42**(7):587-605.
24. Craig P, Dieppe P, Macintyre S, et al, Medical Research Council Guidance: **Developing and evaluating complex interventions: the new Medical Research Council guidance.** *BMJ* 2008, **337**:a1655.
25. Kothmann E, Danjoux G, Owen SJ, et al: **Reliability of the anaerobic threshold in cardiopulmonary exercise testing of patients with abdominal aortic aneurysms.** *Anaesthesia* 2009, **64**(1):9-13.
26. EVAR trial participants: **Endovascular aneurysm repair versus open repair in patients with abdominal aortic aneurysm (EVAR trial 1): randomised controlled trial.** *Lancet* 2005, **365**(9478):2179-2186.
27. Prinssen M, Buskens E, Blankensteijn JD, DREAM trial participants: **Quality of life endovascular and open AAA repair. Results of a randomised trial.** *Eur J Vasc Endovasc Surg* 2004, **27**(2):121-127.
28. Adamson SJ, Bland JM, Hay EM, Johnson RE, Jones GT, Kitchener H, Moffett JA, Macfarlane GJ, MacPherson H, McLean S, Nelson L, Salisbury C, Thomas E, Tilbrook HE, Torgerson DJ: **Patients' preferences within randomised trials: systematic review and patient level meta-analysis.** *BMJ* 2008, **337**:a1864.
29. Rognmo Ø, Moholdt T, Bakken H, et al: **Cardiovascular risk of high- versus moderate-intensity aerobic exercise in coronary heart disease patients.** *Circulation* 2012, **126**(12):1436-1440.
30. Moholdt TT, Amundsen BH, Rustad LA, et al: **Aerobic interval training versus continuous moderate exercise after coronary artery bypass surgery: a randomized study of cardiovascular effects and quality of life.** *Am Heart J* 2009, **158**(6):1031-1037.
31. Moholdt T, Aamot IL, Granøien I, Gjerde L, et al: **Aerobic interval training increases peak oxygen uptake more than usual care exercise training in**

- 1  
2  
3 myocardial infarction patients: a randomized controlled study. *Clin Rehabil* 2012, **26**(1):33-44.
- 4  
5 32. Poole DC, Ward SA, Gardner GW, et al: **Metabolic and respiratory profile**  
6 **of the upper limit for prolonged exercise in man.** *Ergonomics* 1988,  
7 **31**(9):1265-1279.
- 8  
9 33. Borg GA: **Psychophysical bases of perceived exertion.** *Med Sci Sports*  
10 *Exerc* 1982, **14**(5):377-381.
- 11  
12 34. Myers J, Dalman R, Hill B: **Exercise, Vascular Health, and Abdominal**  
13 **Aortic Aneurysms.** *J Clin Exerc Physiol* 2012, **1**:1-8.
- 14  
15 35. Neuffer PD: **The effect of detraining and reduced training on the**  
16 **physiological adaptations to aerobic exercise training.** *Sports Med* 1989,  
17 **8**(5):302-320.
- 18  
19 36. Stanley DM, Williams SE, Cumming JL: **Preliminary validation of a single-**  
20 **item measure of exercise enjoyment: The Exercise Enjoyment Scale.** *J*  
21 *Sport Exerc Psych* 2009, **31**:S138-139.
- 22  
23 37. Kendzierski D, DeCarlo KJ: **Physical Activity Enjoyment Scale: Two**  
24 **validation studies.** *J Sport Exerc Psych* 1991, **13**:50-64.
- 25  
26 38. Myers JN, White JJ, Narasimhan B, Dalman RL: **Effects of exercise training**  
27 **in patients with abdominal aortic aneurysm: preliminary results from a**  
28 **randomized trial.** *J Cardiopulm Rehabil Prev* 2010, **30**(6):374-383.
- 29  
30 39. Moll FL, Powell JT, Fraedrich G, Verzini F, Haulon S, Waltham M, van  
31 Herwaarden JA, Holt PJ, van Keulen JW, Rantner B, Schlösser FJ, Setacci F,  
32 Ricco JB: **Management of abdominal aortic aneurysms clinical practice**  
33 **guidelines of the European society for vascular surgery.** *Eur J Vasc*  
34 *Endovasc Surg* 2011, **41 Suppl 1**:S1-S58.
- 35  
36 40. Hirsch AT, Haskal ZJ, Hertzner NR, Bakal CW, et al.: **ACC/AHA 2005 Practice**  
37 **Guidelines for the management of patients with peripheral arterial**  
38 **disease (lower extremity, renal, mesenteric, and abdominal aortic).**  
39 *Circulation* 2006, **113**(11):e463-654.
- 40  
41 41. Best PJ, Tajik AJ, Gibbons RJ, Pellikka PA: **The safety of treadmill exercise**  
42 **stress testing in patients with abdominal aortic aneurysms.** *Ann Intern*  
43 *Med* 1998, **129**(8):628-631.
- 44  
45 42. Thompson PD, Franklin BA, Balady GJ, et alF; American Heart Association  
46 Council on Nutrition, Physical Activity, and Metabolism; American Heart  
47 Association Council on Clinical Cardiology; American College of Sports  
48 Medicine: **Exercise and acute cardiovascular events placing the risks**  
49 **into perspective: a scientific statement from the American Heart**  
50 **Association Council on Nutrition, Physical Activity, and Metabolism and**  
51 **the Council on Clinical Cardiology.** *Circulation* 2007, **115**(17):2358-2368.
- 52  
53 43. Bennett-Guerrero E, Welsby I, Dunn TJ, et al;: **The use of a postoperative**  
54 **morbidity survey to evaluate patients with prolonged hospitalization**  
55 **after routine, moderate-risk, elective surgery.** *Anesth Analg* 1999,  
56 **89**(2):514-519.
- 57  
58 44. Grocott MP, Browne JP, Van der Meulen J, et al: **The Postoperative**  
59 **Morbidity Survey was validated and used to describe morbidity after**  
60 **major surgery.** *J Clin Epidemiol* 2007, **60**(9):919-928.
45. Curtis L: **Unit Costs of Health and Social Care 2012.** PRSSU. University of  
Kent.
46. Department of Health: **NHS reference costs: financial year 2011 to 2012:**  
November 2012.

## Figure legends

Figure 1 Study flowchart

For peer review only

# High-intensity Interval exercise Training before Abdominal Aortic Aneurysm repair (HIT-AAA): protocol for a randomised controlled feasibility trial

Garry A Tew<sup>1</sup>

Email: [g.tew@shu.ac.uk](mailto:g.tew@shu.ac.uk) [garry.tew@york.ac.uk](mailto:garry.tew@york.ac.uk)

Matthew Weston<sup>2</sup>

Email: [m.weston@tees.ac.uk](mailto:m.weston@tees.ac.uk)

Elke Kothmann<sup>3</sup>

Email: [elke.kothmann@stees.nhs.uk](mailto:elke.kothmann@stees.nhs.uk)

Alan M Batterham<sup>4</sup>

Email: [a.batterham@tees.ac.uk](mailto:a.batterham@tees.ac.uk)

Joanne Gray<sup>5</sup>

Email: [joanne3.gray@northumbria.ac.uk](mailto:joanne3.gray@northumbria.ac.uk)

Karen Kerr<sup>6</sup>

Email: [Karen.Kerr2@sth.nhs.uk](mailto:Karen.Kerr2@sth.nhs.uk)

Denis Martin<sup>4</sup>

Email: [d.martin@tees.ac.uk](mailto:d.martin@tees.ac.uk)

Shah Nawaz<sup>7</sup>

Email: [Shah.Nawaz@sth.nhs.uk](mailto:Shah.Nawaz@sth.nhs.uk)

David Yates<sup>8</sup>

Email: [david.yates@york.nhs.uk](mailto:david.yates@york.nhs.uk)

Gerard Danjoux<sup>3\*</sup>

\* Corresponding author

Email: [Gerard.danjoux@stees.nhs.uk](mailto:Gerard.danjoux@stees.nhs.uk)

1 York Trials Unit, Department of Health Sciences, University of York, York, YO10 5DD, UK  
Centre for Sport and Exercise Science, Sheffield Hallam University, Sheffield S10 2BP, UK

2 School of Social Sciences & Law, Teesside University, Middlesbrough, TS1 3BA, UK

3 Department of Academic Anaesthesia, James Cook University Hospital, Middlesbrough, TS4 3BW, UK

4 Health and Social Care Institute, Teesside University, Middlesbrough, TS1 3BA, UK

5 Faculty of Health & Life Sciences, Northumbria University, Benton, Newcastle-Upon-Tyne, NE7 7XA, UK

1  
2  
3  
4 6 Department of Anaesthesia, Northern General Hospital, Sheffield Teaching  
5 Hospitals Foundation Trust, Sheffield, S5 7AU, UK  
6

7 7 Sheffield Vascular Institute, Northern General Hospital, Sheffield, UK, S5 7AU, UK  
8

9  
10 8 Department of Anaesthesia, York Hospital, York, YO31 8HE, UK  
11  
12  
13  
14  
15  
16  
17  
18  
19  
20  
21  
22  
23  
24  
25  
26  
27  
28  
29  
30  
31  
32  
33  
34  
35  
36  
37  
38  
39  
40  
41  
42  
43  
44  
45  
46  
47  
48  
49  
50  
51  
52  
53  
54  
55  
56  
57  
58  
59  
60

For peer review only



## Abstract

### Background

Abdominal aortic aneurysm (AAA) is a frequently lethal disease affecting ~5% of men aged 50-79 years. In patients with large AAA (diameter >5.5 cm), mechanical intervention (i.e., open surgical or endovascular aneurysm repair) is often used to minimise the risk of aneurysm-related rupture and death; however, aneurysm repair itself carries high risk.

Low cardiopulmonary fitness is associated with an increased risk of early post-operative complications and death following elective AAA repair. Therefore, fitness should be enhanced before aneurysm repair. High-intensity interval exercise training (HIT) is a potent, time-efficient strategy for enhancing cardiopulmonary fitness. However, the feasibility, safety and effectiveness of HIT in patients awaiting AAA repair is unknown.

Here, we describe a feasibility study for a definitive trial of a pre-operative HIT intervention to improve post-operative outcomes in patients undergoing elective AAA repair. The main aim is to identify the primary outcome and estimated sample size for a definitive trial. A secondary aim is to investigate the suitability of HIT, primarily in terms of adherence, safety, acceptability, and its potential impact on cardiopulmonary fitness and post-surgery outcomes.

### Methods/Design

This is a two-arm randomised controlled trial. A minimum of fifty patients awaiting elective repair of a 5.5 to 7.0 cm infra-renal AAA will be allocated by minimisation to HIT or usual care control in a 1:1 ratio. Patients allocated to HIT will complete three hospital-based exercise sessions per week, for 4 weeks. Each session will include 2 or 4 minutes of high-intensity stationary cycling followed by the same duration of easy cycling or passive recovery, repeated until a total of 16 minutes of high-intensity exercise is accumulated. Outcomes to be assessed before randomisation and 24 to 48 hours before aneurysm repair (week 5 where possible) include cardiopulmonary fitness, maximum AAA diameter, and health-related quality of life. In the post-operative period, we will record destination (ward or critical care unit), organ-specific morbidity, mortality, and the durations of critical care and hospital stay. Twelve weeks after discharge, participants will be interviewed to re-assess quality of life and determine post-discharge healthcare utilisation. The costs associated with the exercise intervention and healthcare utilisation will be calculated.

### Trial registration

Current Controlled Trials ISRCTN09433624

### Keywords

Aortic aneurysm, abdominal; Vascular diseases; Exercise; Rehabilitation; Physical fitness; Feasibility studies; Randomized controlled trial

## Background

Major non-cardiac surgery is associated with substantial peri-operative risk; the overall mortality rate appears low (c. 1-2%), but the number of operations performed (c. 250 million per annum worldwide) results in a large absolute number of deaths [1]. Moreover, post-operative complications occur up to 5 times as frequently [1], with survivors experiencing physical limitations and reduced life expectancy [2, 3]. Identification of individuals in this 'at risk' group for death and complications creates a significant challenge to clinicians in the pre-operative period. Objective assessment of cardiopulmonary fitness in the pre-operative period utilising cardiopulmonary exercise testing (CPET) is the established gold standard across the UK. It has a developing evidence base in predicting adverse outcome across a variety of high-risk surgical procedures [4], and this has contributed substantially to clinicians' understanding of the impact of poor cardiopulmonary fitness.

There is a convincing physiological rationale linking improved cardiopulmonary fitness to a reduction in adverse outcome following surgery. The surgical stress response involves neuroendocrine, metabolic and inflammatory effects leading to a catabolic state and increased basal metabolic rate (up to three times pre-operative values [5, 6]). A patient with adequate cardiopulmonary fitness is able meet these extra demands post-operatively, but patients with inadequate fitness levels might be unable to cope, leading to tissue hypoxia and peri-operative complications. Approximately half of patients presenting for intra-abdominal surgery do not have the pre-requisite fitness, on objective exercise testing, to be deemed 'low risk' for peri-operative complications [7]. It is intuitive that improving fitness levels in the pre-operative period will translate to reduced death and complications following major surgery.

Little is known about the impact of pre-operative exercise training on post-operative outcomes. In a recent systematic review [8], the authors concluded that pre-operative exercise therapy prior to cardiac or abdominal surgery results in a reduced hospital length of stay and reduced post-operative morbidity, but that more research is required on the impact and long-term benefits. However, of the five studies identified that focused on cardiac and abdominal surgery, four involved inspiratory muscle training with pulmonary complications as the primary outcome. Clearly, this intervention improves respiratory muscle function, which might reduce post-operative pulmonary morbidity. However, this form of training is unlikely to favourably influence the wider range of sequelae of the surgical stress response. Only one study focused on the effect of a more general pre-surgery exercise training intervention. Arthur *et al.* [9] reported a reduction in median hospital length of stay of 1-day (vs. usual care control) following coronary artery bypass graft surgery with an 8-10 week exercise training programme plus education reinforcement and social support. The intervention involved 30 minutes of aerobic interval training, performed twice a week at 40-70% of functional capacity.

We believe that a programme of research is needed now to evaluate the benefits of pre-operative exercise training in patients undergoing elective non-cardiothoracic surgery. Abdominal aortic aneurysm (AAA) is a frequently lethal disease occurring in ~5% of males aged 50-79 years [10]. Annually 5,000-6,000 surgical repairs are performed across the UK [11], making this an ideal homogenous high-risk target

1  
2  
3 population. The incidence of co-morbid disease is higher than other age-matched  
4 surgical populations: cardiac disease 60-70%, respiratory disease 40-50%, long-term  
5 smoking 50-80%, renal disease 10-12% and diabetes 10-12% [12]. Anecdotal  
6 observation from >1000 CPETs confirms that this population is also substantially  
7 less fit than other age-matched surgical populations. Findings from two recent  
8 publications also support the adverse impact of poor fitness on outcome in patients  
9 undergoing AAA repair [13, 14].  
10

11  
12 Intervention for AAA can be performed by either open or endovascular repair (EVAR),  
13 with a current ratio nationally of 55:45 in favour of EVAR [11]. 30-day mortality for  
14 open surgery in the UK in 2008 was 7-8% [12]. Earlier studies from the USA [15] and  
15 the Netherlands [16] reported major post-operative morbidity of 30-40%.  
16 Endovascular treatment is less invasive, with mortality and cardio-respiratory  
17 morbidity rates of 2-3% [11, 12] and 10-15% [15, 16], respectively. For open surgery  
18 the UK mortality rate was higher than expected with respect to comparable countries,  
19 prompting the publication of a Quality Improvement Programme document with the  
20 explicit remit of standardising management to improve outcome [11]. Encouragingly  
21 such standardisation has brought about a significant 30-day mortality benefit for both  
22 procedures in the Vascular Society's most recent publication: 4.3% and 0.9% for  
23 open AAA and EVAR respectively [17]. Despite this there remains significant room  
24 for improvement. No information is routinely available on non-fatal complications,  
25 which are up to five times more prevalent than mortality and known to affect patient  
26 quality of life and overall life expectancy on hospital discharge. In addition, a key  
27 omission from the guidance is evidence or advice in relation to improving  
28 preoperative fitness, despite the fact that one of the main conclusions of the EVAR-2  
29 study was that vascular teams should be focusing on techniques to improve patient  
30 fitness preoperatively [18].  
31  
32  
33

34 The proposed benefits of exercise "prehabilitation" are mediated by increases in  
35 cardiopulmonary fitness. Two pilot randomised controlled trials undertaken by our  
36 research team have documented improvements in cardiopulmonary fitness following  
37 moderate-intensity endurance exercise training in patients under surveillance for a  
38 small AAA. Kothmann *et al.* [19] reported a 10% increase in the oxygen consumption  
39 at the ventilatory threshold (a sub-maximal marker of cardiopulmonary fitness of  
40 prognostic significance) after 6 weeks of moderate-intensity cycling exercise  
41 performed for 30 minutes twice weekly. Tew *et al.* [20] observed a  $2.5 \text{ mL}\cdot\text{kg}^{-1}\cdot\text{min}^{-1}$   
42 ( $\sim 20\%$ ) improvement in the ventilatory threshold after 12 weeks of moderate-  
43 intensity cycling and treadmill walking exercise performed for 35-45 minutes thrice  
44 weekly. A recent review of preoperative exercise training [21] proposed a research  
45 agenda, with future directions including the role of prehabilitation in improving fitness  
46 levels prior to major surgery, the use of robust study designs with appropriate  
47 outcome measures, and evaluations of the effects of high-intensity interval exercise  
48 training (HIT) as a model for which there is extensive evidence of benefit in other  
49 subject groups, including heart failure patients [22]. A recent literature review by  
50 Giraud in cardiac rehabilitation [23] concluded that when compared to moderate  
51 intensity training, HIT has a similar safety profile (low absolute risk) and produces  
52 greater and more time-efficient improvements in fitness. For the current proposal HIT  
53 therefore represents a particularly attractive approach, as the time-window for  
54 intervention once a patient has been identified for aneurysm repair might be as short  
55  
56  
57  
58  
59  
60

1  
2  
3 as 4-6 weeks [11]. Therefore, an intervention with the potential for more rapid fitness  
4 benefits is preferable.  
5

6  
7 Our programme of work is aligned to the Medical Research Council's guidance for  
8 developing and evaluating complex interventions [24]. Given the limited extent of the  
9 evidence base, a feasibility study is clearly required to inform a subsequent definitive  
10 trial. The MRC guidance stresses that crucial feasibility work is often absent or  
11 insufficient, with 'definitive' trials undermined by acceptability, adherence, and  
12 delivery of the intervention, recruitment and retention issues, and smaller than  
13 expected effect sizes.  
14

15 We are conducting a feasibility study to explore the potential benefits of a 4-week  
16 HIT programme, delivered prior to surgery for AAA repair. This will be stationary  
17 cycle-based, in-hospital and undertaken 3 times per week.  
18

## 19 Aims

### 20 *1. Explore potential primary outcomes for a subsequent definitive randomised 21 controlled trial (RCT)*

22 The physiological rationale suggests a causal pathway between adaptations  
23 consequent to exercise training and reduced mortality and morbidity. Potential  
24 primary outcomes for a definitive trial therefore include 30-day mortality, morbidity  
25 [Post-Operative Morbidity Survey (POMS) score], health-related quality of life  
26 (HRQOL), hospital length of stay, costs and cost-effectiveness  
27  
28  
29

### 30 *2. Examine the suitability of the exercise training for a subsequent definitive RCT*

31 High-intensity interval training shows much promise as an efficacious, time-efficient  
32 and also enjoyable intervention for improving fitness. However, it has not been  
33 employed with AAA patients awaiting repair.  
34  
35

### 36 *3. Examine the willingness of patients to be randomised and explore potential patient 37 preferences*

38 In RCTs, patients might have strong treatment preferences resulting in a refusal to  
39 be randomised, affecting the generalisability of results. Or, they might agree to be  
40 randomised but suffer from 'resentful demoralisation' if they end up in the non-  
41 preferred arm of the trial, leading to poor adherence. This issue requires examination  
42 in a feasibility study, as the preference effects for exercise vs. control in this patient  
43 population are unknown. Theoretically, patients might have a preference for the  
44 exercise arm due to a belief in the benefits. Notwithstanding the patient information  
45 provided, others might be fearful of engaging in high-intensity exercise prior to  
46 surgery and therefore might exhibit a preference for the control arm. These issues  
47 could affect the success of a definitive trial.  
48  
49

## 50 Objectives

### 51 *(Aim 1)*

52 Define the characteristics of the potential outcome measures. Specifically,  
53 1. Define the distribution (e.g. log-normal, Poisson etc. for, e.g., length of hospital  
54 stay) and estimate the variability for the potential primary outcome measures to  
55 inform sample size planning for a subsequent definitive trial.  
56  
57  
58  
59  
60

2. Estimate the effect size (intervention minus control) for each potential outcome variable (point estimate and its uncertainty). This information reflects the effectiveness of the intervention and the 'noise' in the measurement (precision of the measure) and together with the other information will inform the choice of primary outcome for a subsequent trial.

3. Assess the ease of data collection for each potential primary outcome (including participant and clinician burden, assessed via qualitative data).

*(Aim 2)*

This will specifically include; objective fitness changes, safety, enjoyment, delivery and adherence of the exercise intervention

*(Aim 3)*

Examine the strength of patient preferences for either the intervention or control arms (qualitative data). These data will be elicited from all patients assessed as eligible, to determine the extent to which preferences affect both recruitment and adherence.

## Methods/Design

### Study Design

Three-centre, two-arm, parallel-group, randomised, controlled feasibility study. The study flowchart is shown in Figure 1. Ethics approval was secured through Sunderland Research Ethics Committee (reference 13/NE/0116) in May 2013.

---

#### Figure 1 Flowchart of the study

AAA, abdominal aortic aneurysm; EVAR, endovascular aneurysm repair; POMS, post-operative morbidity survey

---

### Study Population and Recruitment Routes

Patients being assessed for surgery for a 5.5-7.0 cm AAA will be approached via vascular surgical or preoperative assessment clinics at recruiting institutions. Potential recruits will be approached at this stage by a study investigator and, if interested, provided a study information sheet. Where an investigator is not available, a study information letter will be sent to the patient requesting permission to contact them about the study.

### Sample Size

The sample size for a feasibility study should be adequate to estimate critical parameters with sufficient precision. Herein, the critical outcome is adherence to the exercise intervention. A patient will be deemed compliant if they complete  $\geq 75\%$  of the scheduled sessions; i.e. 9/12 sessions for a 4-week intervention, plus all once-weekly maintenance sessions if surgery is delayed. We define success with respect to adherence as a lower limit of 0.67 (c. 2/3 of the population) for the 90%

1  
2  
3 confidence interval for the proportion of the exercise group complying with the  
4 intervention. We estimate that  $\geq 85\%$  of the exercise group will be 'compliers' based  
5 on our pilot studies in small AAA patients [19, 20]. A 90% confidence interval for a  
6 single proportion around a value of 0.85 is 0.68 to 0.95 with  $n=25$  patients. Using a  
7 1:1 allocation ratio we require 25 patients per trial arm, 50 in total.  
8

9  
10 A minimum of 50 participants will therefore be recruited to the study.

11  
12 Approximately 150 repairs of AAA  $< 7.0$  cm are performed across our three clinical  
13 institutions annually. Assuming 30% attrition for specialist referral and lack of pre-  
14 requisite fitness, approximately 176 potential patients will be available in our 21-  
15 month recruitment time-window.  
16

### 17 **Clinical Assessment**

18  
19 The clinical assessment processes described are based on routine practice at the  
20 recruiting institutions. All patients who are being considered for an elective AAA  
21 repair will attend a preoperative assessment clinic. Here, an individual's clinical risk  
22 profile for surgery will be established using history of relevant co-morbidities,  
23 physical examination and CPET. Evidence-based optimisation of medication will be  
24 performed at this stage.  
25  
26

27  
28 After risk profiling, a patient's treatment options are discussed in a vascular  
29 multidisciplinary team meeting comprising input from surgery, anaesthesia and  
30 radiology. A risk-benefit assessment is undertaken based on a nationally agreed  
31 care pathway [11]. There are three possible outcomes: open aneurysm repair, EVAR  
32 or conservative management (i.e. when surgical risk is deemed too great or the  
33 patient elects not to proceed). The most appropriate postoperative care facility is  
34 also determined.  
35

36 **Eligibility criteria** – see figure 1

### 37 **Recruitment**

38  
39 Patients who express an interest at clinic, or who are sent a study information letter,  
40 will be contacted by telephone inviting participation (if no exclusion criteria). With  
41 verbal consent, the baseline assessment will be scheduled.  
42  
43  
44

### 45 **Baseline assessment**

46  
47 Written informed consent will be obtained. Participants will confirm their medical  
48 history and current medication and undergo a physical examination. Baseline  
49 measurements will then be recorded, including:  
50

- 51 • Patient characteristics (sex, stature, body mass, body mass index)
- 52 • Resting pulse, blood pressure and oxygen saturations
- 53 • Maximum AAA diameter via trans-abdominal ultrasound (not if an ultrasound  
54 scan has been performed within the previous 8 weeks)
- 55 • Cardiopulmonary fitness via CPET — ~~methods and recorded variables are~~  
56 ~~described above~~. The CPET data will be used to identify the intensity at which  
57 the patients in the exercise group will initiate training. We have previously  
58  
59  
60

demonstrated the reliability of CPET in AAA patients [25]. Testing will be performed according to an agreed protocol across all recruiting sites (available on request).

- HRQOL using the Medical Outcomes Study SF-36 version 2 questionnaire and the EuroQol EQ-5D-5L questionnaire, both of which have been used previously in AAA patients [18, 26, 27].
- Participant preference for 'exercise' training or 'usual care' – prior to randomisation to explore patient preferences and subsequent changes in attitude consequent to the intervention. This design permits the exploration of the effects of preference in the analysis [28].

## Randomisation

After baseline assessment, patients will be randomly allocated 1:1 to exercise or usual care control (no supervised exercise), using minimisation to ensure balance across trial arms for important prognostic factors. We do not list these factors here, to avoid any risk of the staff recruiting patients being able to decipher the allocation sequence. Full details of the minimisation process will be published in a separate document with restricted access. The study statistician (AB) will conduct the minimisation process remotely via e-mail.

## Exercise Intervention (weeks 1-4)

The exercise intervention period will be for 4 weeks leading up to surgery. Where possible, participants (exercise and control) will have a surgical date booked for the following week (week 5).

The exercise programme is broadly based on that which has been shown to be safe and effective for improving cardiopulmonary fitness in patients undergoing cardiac rehabilitation [22, 29-31]. Patients allocated to the exercise group will complete three sessions of hospital-based HIT per week, throughout the 4-week pre-operative period. Exercise will be stationary cycling (Optibike Med, Ergoline, Germany), which has been reported to be a preferred mode for vascular patients (unpublished observations). Each session will begin and end with 10 and 5 minutes of unloaded cycling, respectively. In the first week of training, the main body of each session will involve eight 2-minute bouts of cycling, interspersed with 2-minute periods of unloaded cycling or "off-the-bike" slow walking, depending on patient preference. All of the "work" bouts during the very first session will be performed at the power output associated with ventilatory threshold determined on baseline CPET (i.e. the demarcation between moderate and heavy exercise intensity domains [32]). In subsequent sessions, power output will be gradually manipulated until the patient reports a perceived exertion of 6-7 on Borg's CR-10 scale [33] (i.e. hard to very hard) at the end of each work interval. However, for safety reasons, the intensity of exercise will be made easier if systolic blood pressure exceeds 180 mm Hg [34] or if heart rate exceeds 95% of the maximum observed on baseline CPET. In weeks 2-4, and for variety, the patient will be allowed to choose between doing four 4-minute work bouts or eight 2-minute bouts as the main body of each exercise session, both with a 1:1 work-to-rest ratio. Thus, each session will last ~45 minutes regardless of patient choice, which will include 16 minutes of high-intensity exercise. An experienced physiotherapist will supervise each session and record power output,

1  
2  
3 perceived exertion, and blood pressure (manual sphygmomanometer) at the end of  
4 each work interval. Heart rate will be recorded continuously at 5 s intervals through  
5 the entire exercise session (Polar RS400, Kempele, Finland). The collection of such  
6 data will permit a detailed quantification of the exercise intervention. Patients who do  
7 not undergo surgery in week 5 will complete one HIT session per week up until  
8 surgery to maintain fitness [35]. All adverse events will be recorded.  
9

10  
11 Information in relation to *participant's perceived enjoyment of exercise* is important to  
12 monitor. This is of relevance in adherence to the programme, whilst providing  
13 valuable information for planning a definitive study. We therefore plan to assess:

- 14 1. Changes in enjoyment of exercise both within sessions and throughout the  
15 programme. Perceived or likely enjoyment can change prior, during and after  
16 exercise as a consequence of a variety of factors e.g. anxiety, enjoyment,  
17 fatigue. We therefore plan to ask participants to assess enjoyment/perceived  
18 enjoyment of exercise prior to commencing, during and 20 minutes after  
19 exercise using a simple validated rating scale [36]. This will take <30 seconds  
20 to administer on each occasion and will be done during the first (baseline), 3<sup>rd</sup>,  
21 6<sup>th</sup>, 9<sup>th</sup> and 12<sup>th</sup> sessions to track changes consequent to the programme.  
22
- 23 2. Overall enjoyment of the exercise programme will be assessed during the  
24 week 5 assessment, using the validated multi-dimensional physical activity  
25 enjoyment scale (PACES) [37]. This will be 2-3 days following completion of  
26 the overall programme, allowing participants reflection and evaluation time  
27 (see week 5 assessment below).  
28

29  
30 Two experienced exercise scientists will be responsible for ensuring treatment  
31 fidelity of the exercise programme (GT, MW).  
32

### 33 **Safety Considerations**

34  
35 There are two main safety considerations regarding running a programme of HIT in  
36 patients with AAA disease:

- 37 1. Cardiac risk – as previously outlined 60-70% of individuals with AAA disease  
38 suffer from comorbid cardiac disease. The baseline assessment of clinical risk  
39 profile and CPET will be instrumental in assessing this risk in detail, under the  
40 stress of exercise, at the outset. A recent review by Guiraud *et al.* [23]  
41 highlights the safety of HIT in patients with underlying coronary disease, heart  
42 failure and patients at risk of cardiovascular disease. We are reassured by  
43 their conclusion which states "there is growing scientific evidence that HIT  
44 presents little danger for selected stable cardiac patients, provided that the  
45 prescribed protocols are respected".  
46  
47

48 In the event of an adverse cardiac event we will have the following in place:

- 49 • Staff experienced and Intermediate Life Support-trained
- 50 • Resuscitation equipment and oxygen immediately available
- 51 • Hospital cardiac arrest team fully informed of time and place of training  
52 sessions
- 53 • Participants requiring further assessment will be transferred to the  
54 Accident and Emergency Unit within the relevant hospital.  
55  
56

57 All institutions have Cardiology expertise immediately available on site.  
58  
59  
60



1  
2  
3  
4 2. Risk of AAA expansion or rupture – an intuitive concern regarding exercise  
5 testing and training in patients with aneurysms is of excessive rises in double-  
6 product (systolic blood pressure × heart rate) evoking aneurysm expansion  
7 and rupture. However, the available evidence suggests that these concerns  
8 are unfounded. For example, no aneurysm ruptures or excessive aneurysm  
9 growth rates were reported in any of the three studies of moderate-intensity  
10 exercise training in patients with early AAA disease (from >4000 exercise  
11 sessions; [19, 20, 38]), two of which were conducted at our institutions [19,  
12 20]. Further unpublished data from our institutions indicate no ruptures  
13 from >1300 maximal exercise tests in patients with large asymptomatic AAA  
14 being considered for elective aneurysm repair. Moreover, through national  
15 networked connections, and other relevant publications, we believe this  
16 position of safety to be correct for >5000 maximal exercise tests. This position  
17 is also supported by the European guidelines for the management of AAA  
18 disease, which state that physical activity is not associated with AAA growth  
19 [39], as well as the ACC/AHA Practice Guidelines for the Management of  
20 Patients with Peripheral Vascular Disease [40], which suggest that AAA  
21 patients should not be fearful of vigorous activity. The only reported adverse  
22 event we are aware of came from the patient series of Best *et al.* [41] where a  
23 rupture occurred 12 hours after maximal exercise testing in a patient with a  
24 6.1 cm AAA, yielding a rupture rate for this study of 0.4%. However, the  
25 causal relationship between exercise and rupture is difficult to establish given  
26 the 12-hour intervening period.  
27  
28  
29  
30

31 It would therefore appear that the risk of AAA growth or rupture is very low in  
32 the context of exercise training for individuals with both small and large  
33 aneurysmal disease. This risk would appear to be <1:5,000. When balanced  
34 against national perioperative mortality/morbidity figures available for surgery  
35 in the UK at present, we feel that this represents clear benefit in favour of  
36 undertaking the preoperative exercise as set out.  
37

38 In the event of a suspected AAA rupture patients would immediately be  
39 transferred to the Accident and Emergency department for prompt further  
40 evaluation. All clinical institutions have on-site vascular teams able to  
41 immediately respond to such a situation.  
42

43  
44 Despite this we see risk minimisation in this context as our primary concern and  
45 will implement the following control measures:

- 46 • Thorough pre-participation screening
- 47 • Exclusion of high-risk patients
- 48 • Hospital-based exercise testing and training
- 49 • Exercise sessions supervised by experienced cardiac physiotherapists  
50 trained in Intermediate Life Support
- 51 • Exercise sessions performed >3 hours after waking given the higher  
52 frequency of cardiovascular events during the morning hours [42]
- 53 • Prompt evaluation of prodromal symptoms
- 54 • Resuscitation equipment and oxygen immediately available
- 55 • Exercise termination if a patient has signs/symptoms suggestive of distress,  
56 cardiac or AAA adverse event  
57  
58  
59  
60

- Reduction in exercise intensity if a patient has systolic blood pressure rise to >180 mm Hg, or heart rate >95% of their maximum (from baseline CPET)

### Safety Governance

In line with Medical Research Council guidance we have developed the following safety governance structure for the study:

- Data Monitoring and Ethics Committee (DMEC) – the DMEC comprises three academics/clinicians with appropriate expertise who are independent from the running of the study. Any serious adverse events will be reported to and fully investigated by the DMEC. The DMEC will make recommendations to the Trial Steering Committee with regards to any ethical or safety concerns they may have.
- Trial Steering Committee (TSC) – this committee is led by the Chief Investigator (CI), with representation from all collaborating clinical and academic institutions. A lay representative will be approached to sit on the committee. The TSC will meet 3 times per year to discuss all elements of study progress and conduct.
- TSC Safety Committee – a formal study safety committee has been established and comprises 3 study investigators, including the CI. This group has the remit of ensuring all appropriate safety standards are in place prior to study commencement, and during the course of the research.

All adverse and serious adverse events will be managed within the strict governance arrangements of the study sponsor and participating clinical institutions.

### **Week 5 assessments**

During week 5 it is anticipated that participants will undergo AAA repair. In the same week, but 1-2 days prior to surgery, assessments will be performed in all participants. The outcomes, which are primarily aimed at investigating the safety and effectiveness of the exercise intervention compared with usual care, will include:

- Cardiopulmonary fitness via CPET (to assess fitness changes from baseline)
- Maximum AAA diameter via trans-abdominal ultrasound (to establish safety of exercise in relation to aneurysm growth)
- HRQOL questionnaires
- PACES assessment for overall exercise programme enjoyment (exercise intervention group only)

Due to logistical reasons it is anticipated that not all participants will undergo surgery in week 5. This will mainly be due to a temporary lack of hospital beds for admission preoperatively, or critical care post-operatively. In this situation, surgery will be rescheduled, where possible, within 4 weeks. A repeat CPET will be undertaken in patients whose surgery is delayed >4 weeks, to ensure we have an accurate assessment of pre-operative fitness in all patients. A CPET assessment of those patients who have performed one high-intensity training session per week from week 5 onwards will provide further valuable information of the dose-response nature of high-intensity training in this population.

An overview of data to be collected for this aspect of the study can be seen on the study Case Report Form (see Additional file 1).

## Perioperative period

Participants will undergo open or endovascular aneurysm repair as determined at the multidisciplinary team meeting. All perioperative care will be at the discretion of the vascular teams (as per usual practice) who will be blinded to group allocation. Perioperative data will be collected as seen in Additional file 1.

Post-operatively an investigator blinded to group allocation will determine the following:

- Destination – ward or critical care unit
- Postoperative Morbidity Survey Score (POMS) – a validated tool used to assess organ-specific morbidity in the post-operative period [43, 44]. Scores will be collected daily.
- Mortality
- Length of critical care and hospital stay

## Post-discharge follow-up

At hospital discharge patients will be asked to keep a service receipt inventory to record treatment/care requirements for a 12-week period to inform the resource utilisation analysis. Participants will be interviewed via telephone at 6 weeks, with a follow-up appointment at 12 weeks after discharge to assess:

- HRQOL
- Resource utilisation
- Hospital readmissions, with diagnosis, within 12 weeks of initial discharge

## Analysis Plan of Quantitative Study

Adherence with the exercise intervention will be analysed as described in the sample size justification, above, via the confidence interval for a single proportion. For the potential primary outcomes for a subsequent definitive trial, the likely effect of the exercise intervention will be estimated via standard intervention minus control comparisons (accounting for the type of variable and its distributional properties). We will examine the disposition of the 90% confidence interval for the observed effect to the minimum clinically important difference for each variable. Inasmuch as this is a feasibility study, these comparisons are exploratory and are intended to inform the subsequent trial. Data management will be performed according to the governance arrangements of the institutions involved in the project.

## Analysis of Health Economics and Cost Effectiveness

A prospective economic evaluation will be rehearsed to develop and refine methods for a subsequent definitive trial. The main focus will be on how to accurately identify, quantify and value the additional costs of delivering the intervention and the potential resource implications versus usual care post-operatively and post-discharge. The costing approach will incorporate a broad analytical perspective (National Health Service and Social Services), which will help to detect cost-shifting between sectors. Resources utilised in the exercise group will be identified in terms of capital equipment and staff time. A staff-reported health economics questionnaire has been

1  
2  
3 developed to facilitate this (available upon request). Post-operative resource use will  
4 also be explored for all participants in terms of bed days (including critical care bed  
5 days). Post-discharge resource use for all treatment/care related to AAA surgery will  
6 be assessed retrospectively for 12 weeks by piloting the use of a self-report Service  
7 Receipt Inventory (patient diary). This will facilitate the development of a reliable and  
8 valid tool to capture resource use. Appropriate unit costs to be applied to resource  
9 use will be identified. These will be sourced from a combination of local costings and  
10 national databases [45, 46]. All costs will be combined to rehearse the methods for  
11 total health and social care cost estimation in a subsequent definitive trial.  
12  
13

14 The methods to estimate an incremental cost-effectiveness ratio for exercise versus  
15 usual care in terms of Quality Adjusted Life Years will be rehearsed (using EQ-5D 5L  
16 administered at baseline and 12 weeks post discharge). In particular, issues relevant  
17 for sensitivity analysis will be explored to help understand how best to deal with  
18 statistical imprecision and other uncertainties in the full trial. For example, data will  
19 be bootstrapped to account for the expected skewness evident in economic cost  
20 data. The data collected as part of this feasibility study could be used to inform  
21 subsequent pre-trial modelling.  
22  
23

### 24 **Analysis of Participant Interviews**

25  
26 We aim to explore participants' post-discharge experience. From a critical realism  
27 perspective, semi-structured interviews will cover quality of life, function and attitudes  
28 to exercise including fear.  
29

30  
31 Sixteen participants will be recruited using purposive sampling and the following  
32 criteria: men and women; a range of ages; both study groups; both forms of  
33 aneurysm repair; and a range of experiences post-discharge. The interviews (1 hour  
34 with a research nurse; audio-recorded and transcribed) will take place in the hospital  
35 at the 12-week post-discharge visit. Transcripts will be analysed thematically using  
36 quantitative and diary data for triangulation.  
37

38 Qualitative data (brief interview) will also be collected from all participants (and from  
39 clinical outcome assessors where relevant) to assess the ease of data collection for  
40 each potential primary outcome (participant and clinician burden), to evaluate the  
41 perceived enjoyment of the exercise intervention, and to examine the strength of  
42 patient preferences for either the intervention or control arms. These data will be  
43 elicited from all patients assessed as eligible, to help determine the extent to which  
44 preferences affect both recruitment and adherence.  
45  
46

### 47 **Criteria for success**

48  
49 A subsequent definitive RCT will be deemed feasible if:

- 50 1. An appropriate primary outcome variable is defined;
- 51 2. The lower limit of the 90% confidence interval for the proportion of the exercise  
52 intervention group complying with the intervention is  $\geq 67\%$ . A patient is defined as  
53 having complied with the intervention if he completes  $\geq 75\%$  of the scheduled  
54 sessions;
- 55 3. Patient preferences are not so strong that they result in the conclusion that an  
56 RCT is not a feasible design.  
57  
58  
59  
60

## Dissemination strategy

The dissemination strategy for this research will be to inform a wide range of local, national and international audiences about the results and conclusions. It must however be remembered as part of this strategy that the current proposal is for preliminary work aimed at defining a subsequent definitive clinical trial.

1. Health professionals – we aim to publish our research in journals that cover the relevant medical specialties and with preference for those that deposit publications in open access databases to increase free dissemination. In addition, we aim to present this research at appropriate national and international conferences.

2. Users – from this perspective we aim in the first instance to collaborate with our patient representatives (from advisory and steering groups) and local experts in patient and public involvement to best facilitate user dissemination. We plan to write a specific news piece that will be forwarded to appropriate groups and organisations.

3. Service managers – as an exploratory study it is unlikely that results from this study will directly influence commissioning processes in the short term. More we will engage with appropriate primary and secondary care groups to discuss support for our proposed definitive study leading on from this research.

## Trial status

Start date: 1 August 2013

Expected end date: 30 May 2015

Expected publication date: 1 January 2016

Status at time of submission of this article: approvals obtained, but not yet recruiting

Funder: UK National Institute of Health Research - Research for Patient Benefit Programme (PB-PG-1111-26068)

## List of abbreviations used (if any)

|       |                                           |
|-------|-------------------------------------------|
| AAA   | abdominal aortic aneurysm                 |
| CPET  | cardiopulmonary exercise testing          |
| EVAR  | endovascular aneurysm repair              |
| HIT   | high-intensity interval exercise training |
| HRQOL | health-related quality of life            |
| PACES | physical activity enjoyment scale         |
| POMS  | post-operative morbidity survey           |
| RCT   | randomised controlled trial               |

## Competing interests

The authors declare that they have no competing interests.

## Authors' contributions

GT drafted the manuscript and contributed to the design of the study. Original study concept was by GD and AB. All co-authors contributed to the design of the study. GD is Chief Investigator for the project. EK is Principal Investigator (PI) at James Cook University Hospital (South Tees), SN is PI at Northern General Hospital (Sheffield) and DY is PI at York Hospital. All authors contributed to the critical revision of the manuscript for important intellectual content and read and approved the final manuscript.

## Acknowledgements

This study is funded by the National Institute for Health Research (NIHR) under its Research for Patient Benefit (RfPB) Programme (Grant Reference Number PB-PG-1111-26068). The views expressed are those of the authors and not necessarily those of the NHS, the NIHR or the Department of Health. The following individuals are acknowledged for making a substantial contribution to the development of this study: Louise Cawthorn, Susan Ward and Esther Carr. The primary trial sponsor is South Tees NHS Foundation Trust (Marton Road, Middlesbrough, TS4 3BW).

## References

1. Pearse RM, Holt PJ, Grocott MP: **Managing perioperative risk in patients undergoing elective non-cardiac surgery**. *BMJ* 2011, **343**:d5759.
2. Head J, Ferrie JE, Alexanderson K, Westerlund H, Vahtera J, Kivimäki M: **Diagnosis-specific sickness absence as a predictor of mortality: the Whitehall II prospective cohort study**. *BMJ* 2008, **337**:a1469.
3. Khuri SF, Henderson WG, DePalma RG, Mosca C, Healey NA, Kumbhani DJ, Participants in the VA National Surgical Quality Improvement Program: **Determinants of long-term survival after major surgery and the adverse effect of postoperative complications**. *Ann Surg* 2005, **242**(3):326-341.
4. Hennis PJ, Meale PM, Grocott MP: **Cardiopulmonary exercise testing for the evaluation of perioperative risk in non-cardiopulmonary surgery**. *Postgrad Med J* 2011, **87**(1030):550-557.
5. Viale JP, Annat GJ, Ravat FM, Pommier CM, Brudon JR, Desuzinges CJ, Bertrand OM, Motin JP: **Oxygen uptake and mixed venous oxygen saturation during aortic surgery and the first three postoperative hours**. *Anesth Analg* 1991, **73**(5):530-535.
6. Older P, Smith R: **Experience with the preoperative invasive measurement of haemodynamic, respiratory and renal function in 100 elderly patients scheduled for major abdominal surgery**. *Anaesth Intensive Care* 1988, **16**(4):389-395.
7. Wilson RJ, Davies S, Yates D, Redman J, Stone M: **Impaired functional capacity is associated with all-cause mortality after major elective intra-abdominal surgery**. *Br J Anaesth* 2010, **105**(3):297-303.

- 1
  - 2
  - 3
  - 4
  - 5
  - 6
  - 7
  - 8
  - 9
  - 10
  - 11
  - 12
  - 13
  - 14
  - 15
  - 16
  - 17
  - 18
  - 19
  - 20
  - 21
  - 22
  - 23
  - 24
  - 25
  - 26
  - 27
  - 28
  - 29
  - 30
  - 31
  - 32
  - 33
  - 34
  - 35
  - 36
  - 37
  - 38
  - 39
  - 40
  - 41
  - 42
  - 43
  - 44
  - 45
  - 46
  - 47
  - 48
  - 49
  - 50
  - 51
  - 52
  - 53
  - 54
  - 55
  - 56
  - 57
  - 58
  - 59
  - 60
8. Valkenet K, van de Port IG, Dronkers JJ, de Vries WR, Lindeman E, Backx FJ: **The effects of preoperative exercise therapy on postoperative outcome: a systematic review.** *Clin Rehabil* 2011, **25**(2):99-111.
9. Arthur HM, Daniels C, McKelvie R, Hirsh J, Rush B: **Effect of a preoperative intervention on preoperative and postoperative outcomes in low-risk patients awaiting elective coronary artery bypass graft surgery. A randomized, controlled trial.** *Ann Intern Med* 2000, **133**(4):253-262.
10. Lederle F, Johnson G, Wilson S, Vete ADM: **Abdominal aortic aneurysm in women.** *J Vasc Surg* 2001, **34**(1):122-126.
11. **National Abdominal Aortic Aneurysm Quality Improvement Programme Interim report** [<http://www.aaaqip.com/files/aaaqip-interim-report-new-final-printed-version-23-06-11.pdf>]
12. **Second Vascular Surgery Database Report 2008** [<http://www.esvs.org/sites/default/files/file/Vascunet/Vascunet%20report%2008.pdf>]
13. Hartley RA, Pichel AC, Grant SW, Hickey GL, Lancaster PS, Wisely NA, McCollum CN, Atkinson D: **Preoperative cardiopulmonary exercise testing and risk of early mortality following abdominal aortic aneurysm repair.** *Br J Surg* 2012, **99**(11):1539-1546.
14. Prentis JM, Trenell MI, Jones DJ, Lees T, Clarke M, Snowden CP: **Submaximal exercise testing predicts perioperative hospitalization after aortic aneurysm repair.** *J Vasc Surg* 2012, **56**(6):1564-1570.
15. Elkouri S, Gloviczki P, McKusick MA, Panneton JM, Andrews J, Bower TC, Noel AA, Harmsen WS, Hoskin TL, Cherry K: **Perioperative complications and early outcome after endovascular and open surgical repair of abdominal aortic aneurysms.** *J Vasc Surg* 2004, **39**(3):497-505.
16. Prinssen M, Verhoeven EL, Buth J, Cuypers PW, van Sambeek MR, Balm R, Buskens E, Grobbee DE, Blankensteijn JD, Dutch Randomized Endovascular Aneurysm Management (DREAM) Trial Group: **A randomized trial comparing conventional and endovascular repair of abdominal aortic aneurysms.** *N Engl J Med* 2004, **351**(16):1607-1618.
17. **Outcomes after Elective Repair of Infra-renal Abdominal Aortic Aneurysm** [<http://www.vascularsociety.org.uk/vascular/wp-content/uploads/2012/11/VSGBI-Mortality-Report.pdf>]
18. EVAR trial participants: **Endovascular aneurysm repair and outcome in patients unfit for open repair of abdominal aortic aneurysm (EVAR trial 2): randomised controlled trial.** *Lancet* 2005, **365**(9478):2187-2192.
19. Kothmann E, Batterham AM, Owen SJ, Turley AJ, Cheesman M, Parry A, Danjoux G: **Effect of short-term exercise training on aerobic fitness in patients with abdominal aortic aneurysms: a pilot study.** *Br J Anaesth* 2009, **103**(4):505-510.
20. Tew GA, Moss J, Crank H, Mitchell PA, Nawaz S: **Endurance exercise training in patients with small abdominal aortic aneurysm: a randomized controlled pilot study.** *Arch Phys Med Rehabil* 2012, **93**(12):2148-2153.
21. Jack S, West M, Grocott MP: **Perioperative exercise training in elderly subjects.** *Best Pract Res Clin Anaesthesiol* 2011, **25**(3):461-472.
22. Wisløff U, Støylen A, Loennechen JP, Bruvold M, Rognmo Ø, Haram PM, Tjønnå AE, Helgerud J, Slørdahl SA, Lee SJ, Videm V, Bye A, Smith GL, Najjar SM, Ellingsen Ø, Skjaerpe T: **Superior cardiovascular effect of**

- 1  
2  
3  
4  
5  
6  
7  
8  
9  
10  
11  
12  
13  
14  
15  
16  
17  
18  
19  
20  
21  
22  
23  
24  
25  
26  
27  
28  
29  
30  
31  
32  
33  
34  
35  
36  
37  
38  
39  
40  
41  
42  
43  
44  
45  
46  
47  
48  
49  
50  
51  
52  
53  
54  
55  
56  
57  
58  
59  
60
- aerobic interval training versus moderate continuous training in heart failure patients: a randomized study. *Circulation* 2007, **115**(24):3086-3094.
23. Guiraud T, Nigam A, Gremeaux V, Meyer P, Juneau M, Bosquet L: **High-intensity interval training in cardiac rehabilitation.** *Sports Med* 2012, **42**(7):587-605.
24. Craig P, Dieppe P, Macintyre S, Michie S, Nazareth I, Petticrew M, Medical Research Council Guidance: **Developing and evaluating complex interventions: the new Medical Research Council guidance.** *BMJ* 2008, **337**:a1655.
25. Kothmann E, Danjoux G, Owen SJ, Parry A, Turley AJ, Batterham AM: **Reliability of the anaerobic threshold in cardiopulmonary exercise testing of patients with abdominal aortic aneurysms.** *Anaesthesia* 2009, **64**(1):9-13.
26. EVAR trial participants: **Endovascular aneurysm repair versus open repair in patients with abdominal aortic aneurysm (EVAR trial 1): randomised controlled trial.** *Lancet* 2005, **365**(9478):2179-2186.
27. Prinssen M, Buskens E, Blankensteijn JD, DREAM trial participants: **Quality of life endovascular and open AAA repair. Results of a randomised trial.** *Eur J Vasc Endovasc Surg* 2004, **27**(2):121-127.
28. Adamson SJ, Bland JM, Hay EM, Johnson RE, Jones GT, Kitchener H, Moffett JA, Macfarlane GJ, MacPherson H, McLean S, Nelson L, Salisbury C, Thomas E, Tilbrook HE, Torgerson DJ: **Patients' preferences within randomised trials: systematic review and patient level meta-analysis.** *BMJ* 2008, **337**:a1864.
29. Rognmo Ø, Moholdt T, Bakken H, Hole T, Mølsted P, Myhr NE, Grimsmo J, Wisløff U: **Cardiovascular risk of high- versus moderate-intensity aerobic exercise in coronary heart disease patients.** *Circulation* 2012, **126**(12):1436-1440.
30. Moholdt TT, Amundsen BH, Rustad LA, Wahba A, Løvø KT, Gullikstad LR, Bye A, Skogvoll E, Wisløff U, Slørdahl SA: **Aerobic interval training versus continuous moderate exercise after coronary artery bypass surgery: a randomized study of cardiovascular effects and quality of life.** *Am Heart J* 2009, **158**(6):1031-1037.
31. Moholdt T, Aamot IL, Granøien I, Gjerde L, Myklebust G, Walderhaug L, Brattbakk L, Hole T, Graven T, Stølen TO *et al*: **Aerobic interval training increases peak oxygen uptake more than usual care exercise training in myocardial infarction patients: a randomized controlled study.** *Clin Rehabil* 2012, **26**(1):33-44.
32. Poole DC, Ward SA, Gardner GW, Whipp BJ: **Metabolic and respiratory profile of the upper limit for prolonged exercise in man.** *Ergonomics* 1988, **31**(9):1265-1279.
33. Borg GA: **Psychophysical bases of perceived exertion.** *Med Sci Sports Exerc* 1982, **14**(5):377-381.
34. Myers J, Dalman R, Hill B: **Exercise, Vascular Health, and Abdominal Aortic Aneurysms.** *J Clin Exerc Physiol* 2012, **1**:1-8.
35. Neuffer PD: **The effect of detraining and reduced training on the physiological adaptations to aerobic exercise training.** *Sports Med* 1989, **8**(5):302-320.



- 1  
2  
3 36. Stanley DM, Williams SE, Cumming JL: **Preliminary validation of a single-**  
4 **item measure of exercise enjoyment: The Exercise Enjoyment Scale.** *J*  
5 *Sport Exerc Psych* 2009, **31**:S138-139.
- 6 37. Kendzierski D, DeCarlo KJ: **Physical Activity Enjoyment Scale: Two**  
7 **validation studies.** *J Sport Exerc Psych* 1991, **13**:50-64.
- 8 38. Myers JN, White JJ, Narasimhan B, Dalman RL: **Effects of exercise training**  
9 **in patients with abdominal aortic aneurysm: preliminary results from a**  
10 **randomized trial.** *J Cardiopulm Rehabil Prev* 2010, **30**(6):374-383.
- 11 39. Moll FL, Powell JT, Fraedrich G, Verzini F, Haulon S, Waltham M, van  
12 Herwaarden JA, Holt PJ, van Keulen JW, Rantner B, Schlösser FJ, Setacci F,  
13 Ricco JB: **Management of abdominal aortic aneurysms clinical practice**  
14 **guidelines of the European society for vascular surgery.** *Eur J Vasc*  
15 *Endovasc Surg* 2011, **41 Suppl 1**:S1-S58.
- 16 40. Hirsch AT, Haskal ZJ, Hertzner NR, Bakal CW, Creager MA, Halperin JL,  
17 Hiratzka LF, Murphy WR, Olin JW, Puschett JB, Rosenfield KA, Sacks D,  
18 Stanley JC, Taylor LM Jr, White CJ, White J, White RA, Antman EM, Smith  
19 SC Jr, Adams CD, Anderson JL, Faxon DP, Fuster V, Gibbons RJ, Hunt SA,  
20 Jacobs AK, Nishimura R, Ornato JP, Page RL, Riegel B *et al.*: **ACC/AHA**  
21 **2005 Practice Guidelines for the management of patients with peripheral**  
22 **arterial disease (lower extremity, renal, mesenteric, and abdominal**  
23 **aortic).** *Circulation* 2006, **113**(11):e463-654.
- 24 41. Best PJ, Tajik AJ, Gibbons RJ, Pellikka PA: **The safety of treadmill exercise**  
25 **stress testing in patients with abdominal aortic aneurysms.** *Ann Intern*  
26 *Med* 1998, **129**(8):628-631.
- 27 42. Thompson PD, Franklin BA, Balady GJ, Blair SN, Corrado D, Estes NA 3rd,  
28 Fulton JE, Gordon NF, Haskell WL, Link MS, Maron BJ, Mittleman MA,  
29 Pelliccia A, Wenger NK, Willich SN, Costa F; American Heart Association  
30 Council on Nutrition, Physical Activity, and Metabolism; American Heart  
31 Association Council on Clinical Cardiology; American College of Sports  
32 Medicine: **Exercise and acute cardiovascular events placing the risks**  
33 **into perspective: a scientific statement from the American Heart**  
34 **Association Council on Nutrition, Physical Activity, and Metabolism and**  
35 **the Council on Clinical Cardiology.** *Circulation* 2007, **115**(17):2358-2368.
- 36 43. Bennett-Guerrero E, Welsby I, Dunn TJ, Young LR, Wahl TA, Diers TL,  
37 Phillips-Bute BG, Newman MF, Mythen MG: **The use of a postoperative**  
38 **morbidity survey to evaluate patients with prolonged hospitalization**  
39 **after routine, moderate-risk, elective surgery.** *Anesth Analg* 1999,  
40 **89**(2):514-519.
- 41 44. Grocott MP, Browne JP, Van der Meulen J, Matejowsky C, Mutch M, Hamilton  
42 MA, Levett DZ, Emberton M, Haddad FS, Mythen MG: **The Postoperative**  
43 **Morbidity Survey was validated and used to describe morbidity after**  
44 **major surgery.** *J Clin Epidemiol* 2007, **60**(9):919-928.
- 45 45. Curtis L: **Unit Costs of Health and Social Care 2012.** PRSSU. University of  
46 Kent.
- 47 46. Department of Health: **NHS reference costs: financial year 2011 to 2012:**  
48 **November 2012.**
- 49  
50  
51  
52  
53  
54  
55  
56  
57  
58  
59  
60

## Figure legends

Figure 1 Study flowchart

For peer review only

1  
2  
3  
4  
5  
6  
7  
8  
9  
10  
11  
12  
13  
14  
15  
16  
17  
18  
19  
20  
21  
22  
23  
24  
25  
26  
27  
28  
29  
30  
31  
32  
33  
34  
35  
36  
37  
38  
39  
40  
41  
42  
43  
44  
45  
46  
47  
48  
49  
50  
51  
52  
53  
54  
55  
56  
57  
58  
59  
60

1  
2  
3  
4  
5  
6  
7  
8  
9  
10  
11  
12  
13  
14  
15  
16  
17  
18  
19  
20  
21  
22  
23  
24  
25  
26  
27  
28  
29  
30  
31  
32  
33  
34  
35  
36  
37  
38  
39  
40  
41  
42  
43  
44  
45  
46  
47  
48  
49  
50  
51  
52  
53  
54  
55  
56  
57  
58  
59  
60

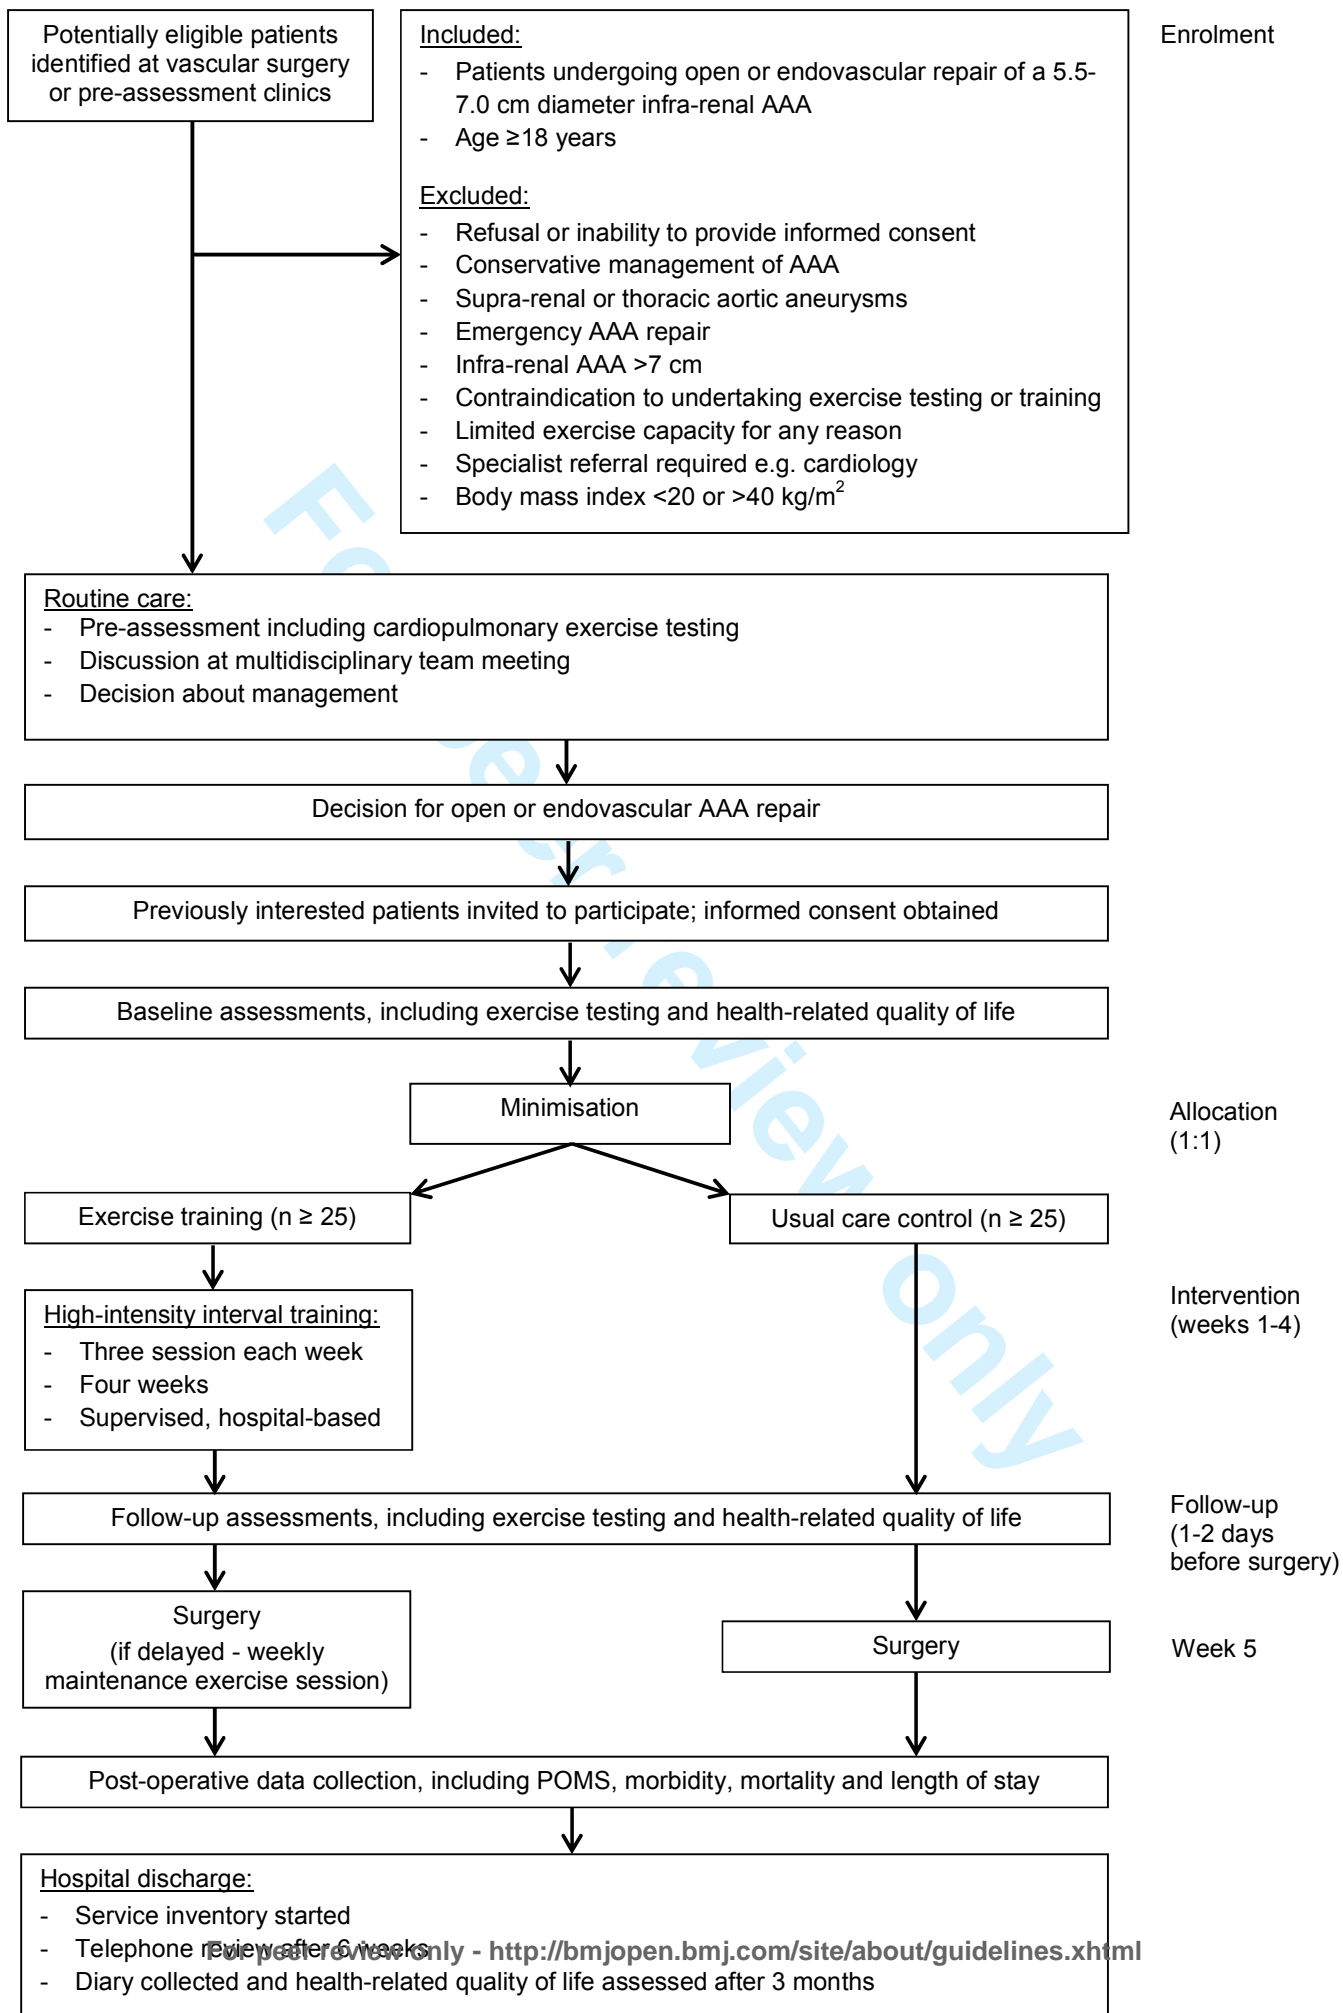

**HIT-AAA: Study Data Collection Form (Case Report Form)**

Participant study number: \_\_\_\_\_ Participant initials: \_\_\_\_\_

Site: South Tees / York / Sheffield

Paperwork checklist (please tick):

- Written informed consent provided? [ ]
- Patient information sheet and copy of consent to patient [ ]
- Patient information sheet and copy of consent in medical notes [ ]
- Place study sticker in patient's notes [ ]
- Complete GP letters informing of patient's entry into study [ ]

## 1. Baseline data (week 0)

Date.....

|                                                               |                                                                      |                       |                                    |
|---------------------------------------------------------------|----------------------------------------------------------------------|-----------------------|------------------------------------|
| <b>Age</b>                                                    | years                                                                | <b>Body mass</b>      | kg                                 |
| <b>Sex</b>                                                    |                                                                      | <b>Stature</b>        | cm                                 |
| <b>Body mass index</b>                                        | kg/m <sup>2</sup>                                                    | <b>Size of AAA</b>    | cm                                 |
| <b>Baseline observations</b>                                  | BP:                                                                  | RHR:                  | Sats: %                            |
| <b>Date of vascular pre-assessment clinic</b>                 |                                                                      |                       |                                    |
| <b>METs score</b>                                             |                                                                      |                       |                                    |
| <b>ASA score</b>                                              |                                                                      |                       |                                    |
| <b>Modified revised cardiac risk index (answer yes or no)</b> |                                                                      |                       |                                    |
|                                                               | Ischaemic heart disease                                              |                       |                                    |
|                                                               | Congestive cardiac failure                                           |                       |                                    |
|                                                               | Cerebrovascular disease                                              |                       |                                    |
|                                                               | Insulin for diabetes mellitus                                        |                       |                                    |
|                                                               | Creatinine > 177 µmol/l                                              |                       |                                    |
|                                                               | Age >70 years                                                        |                       |                                    |
|                                                               | Abnormal electrocardiogram                                           |                       |                                    |
|                                                               | Rhythm (other than sinus)                                            |                       |                                    |
| <b>Quantify abnormality</b>                                   |                                                                      |                       |                                    |
|                                                               | Uncontrolled blood pressure (systolic >160 mmHg, diastolic >90 mmHg) |                       |                                    |
| <b>Other co-morbidities</b>                                   | Chronic obstructive pulmonary disease                                |                       |                                    |
|                                                               | Asthma                                                               |                       |                                    |
|                                                               | Other respiratory disease                                            |                       |                                    |
|                                                               | Smoker (also tick if quit within 6 months)                           |                       |                                    |
|                                                               | Diabetes mellitus                                                    |                       |                                    |
|                                                               | Peripheral arterial disease                                          |                       |                                    |
|                                                               | Gastrointestinal disease                                             |                       |                                    |
|                                                               | Other (free text):                                                   |                       |                                    |
| <b>Baseline creatinine</b><br>(µmol/l)                        |                                                                      |                       |                                    |
| <b>Baseline eGFR</b><br>(ml/min)                              |                                                                      |                       |                                    |
| <b>Baseline haemoglobin</b><br>(mg/dL)                        |                                                                      |                       |                                    |
| <b>Medications</b><br>(please circle)                         | ACE inhibitor                                                        | Statin                | Beta-blocker                       |
|                                                               | Calcium channel blocker                                              | Antiplatelet<br>A C D | Angiotensin II receptor antagonist |
|                                                               | NSAIDs                                                               | Diuretic              | Insulin                            |
|                                                               | Warfarin                                                             | Oral hypoglycaemics   |                                    |

A, aspirin; AAA, abdominal aortic aneurysm; ACE, angiotensin converting enzyme; ASA, American Society of Anesthesiologists; BP, blood pressure; C, clopidogrel; D, dipyridamole; eGFR, estimated glomerular filtration rate; MET, metabolic equivalents; NSAID, non-steroidal anti-inflammatory drug; RHR, resting heart rate.

Preference for exercise group (before randomisation)

Yes / No

## 2. Baseline cardiopulmonary exercise test data (week 0)

Date.....

| Data                                                                   | Results or comment |
|------------------------------------------------------------------------|--------------------|
| Body mass                                                              | kg                 |
| Resting blood pressure                                                 | mmHg               |
| Resting heart rate                                                     | beats/min          |
| VO <sub>2</sub> at rest : Indexed                                      | ml/kg/min          |
| Absolute                                                               | ml/min             |
| Anaerobic threshold Indexed                                            | ml/kg/min          |
| Absolute                                                               | ml/min             |
| Power output at anaerobic threshold                                    | W                  |
| Anaerobic threshold achieved (please circle)                           | Yes No             |
| VE/VCO <sub>2</sub> at anaerobic threshold                             |                    |
| VO <sub>2</sub> peak Indexed                                           | ml/kg/min          |
| Absolute                                                               | ml/min             |
| Power output at VO <sub>2</sub> peak                                   | W                  |
| O <sub>2</sub> pulse at the start of exercise                          | ml/beat            |
| Peak O <sub>2</sub> pulse                                              | ml/beat            |
| Peak heart rate                                                        | beats/min          |
| Peak blood pressure                                                    | mmHg               |
| VE at rest                                                             | l/min              |
| Peak VE                                                                | l/min              |
| Inducible ischaemia (please circle)                                    | Yes No             |
| Heart rate at ischaemia onset                                          | beats/min          |
| Ischaemia before / after anaerobic threshold (please circle)           | Before After       |
| Oscillatory breathing pattern? (please circle)                         | Yes No             |
| Lowest exercise O <sub>2</sub> saturation                              | %                  |
| Oxygen Uptake Efficiency Slope (VO <sub>2</sub> ml/min / log VE l/min) |                    |
| Peak rating of perceived exertion                                      |                    |
| Peak respiratory exchange ratio                                        |                    |
| Reason for termination                                                 |                    |

VCO<sub>2</sub>, carbon dioxide production; VE, volume of expired air; VO<sub>2</sub>, oxygen consumption.

1  
2  
3  
4  
5  
6  
7  
8  
9  
10  
11  
12  
13  
14  
15  
16  
17  
18  
19  
20  
21  
22  
23  
24  
25  
26  
27  
28  
29  
30  
31  
32  
33  
34  
35  
36  
37  
38  
39  
40  
41  
42  
43  
44  
45  
46  
47  
48  
49  
50  
51  
52  
53  
54  
55  
56  
57  
58  
59  
60

**3. Multi-disciplinary team data**

Date.....

|                      |         |             |     |
|----------------------|---------|-------------|-----|
| Type of surgery:     | Open    | EVAR        |     |
| Complexity of EVAR:  | Complex | Non-complex |     |
| Post-op destination: | Ward    | HDU         | ITU |
| Dated for surgery?   | Yes     | No          |     |

Date if known: \_\_\_\_\_

For peer review only

**4. Week 5 cardiopulmonary exercise test data**

Date.....

| Data                                                                   | Results or comment  |       |
|------------------------------------------------------------------------|---------------------|-------|
| Body mass                                                              | kg                  |       |
| Resting blood pressure                                                 | mmHg                |       |
| Resting heart rate                                                     | beats/min           |       |
| VO <sub>2</sub> at rest : Indexed<br>Absolute                          | ml/kg/min<br>ml/min |       |
| Anaerobic threshold Indexed<br>Absolute                                | ml/kg/min<br>ml/min |       |
| Power output at anaerobic threshold                                    | W                   |       |
| Anaerobic threshold achieved (please circle)                           | Yes                 | No    |
| VE/VCO <sub>2</sub> at anaerobic threshold                             |                     |       |
| VO <sub>2</sub> peak Indexed<br>Absolute                               | ml/kg/min<br>ml/min |       |
| Power output at VO <sub>2</sub> peak                                   | W                   |       |
| O <sub>2</sub> pulse at the start of exercise                          | ml/beat             |       |
| Peak O <sub>2</sub> pulse                                              | ml/beat             |       |
| Peak heart rate                                                        | beats/min           |       |
| Peak blood pressure                                                    | mmHg                |       |
| VE at rest                                                             | l/min               |       |
| Peak VE                                                                | l/min               |       |
| Inducible ischaemia (please circle)                                    | Yes                 | No    |
| Heart rate at ischaemia onset                                          | beats/min           |       |
| Ischaemia before / after anaerobic threshold (please circle)           | Before              | After |
| Oscillatory breathing pattern? (please circle)                         | Yes                 | No    |
| Lowest exercise O <sub>2</sub> saturation                              | %                   |       |
| Oxygen Uptake Efficiency Slope (VO <sub>2</sub> ml/min / log VE l/min) |                     |       |
| Peak rating of perceived exertion                                      |                     |       |
| Peak respiratory exchange ratio                                        |                     |       |
| Reason for termination                                                 |                     |       |

VCO<sub>2</sub>, carbon dioxide production; VE, volume of expired air; VO<sub>2</sub>, oxygen consumption.

**Preference for exercise group (following intervention)** Yes / No

**Week 5 Size of AAA (exercise group only)** cm

If surgery delayed by >4 weeks please complete repeat exercise test sheet (p. 9)



### 5. Intra-operative data

Date of admission: \_\_\_\_\_

Date of intervention: \_\_\_\_\_

Days since last exercise test: \_\_\_\_\_ Test number:     **1**     **2**     **3**

#### Intra-operative details

|                                                           |                                                            |                                    |
|-----------------------------------------------------------|------------------------------------------------------------|------------------------------------|
| <b>Type of repair (circle)</b>                            | Open repair                                                | EVAR                               |
| <b>Open repair only:</b>                                  |                                                            |                                    |
| <b>Surgical data</b>                                      | Aortic cross-clamp time                                    | min                                |
|                                                           | Use of supra-renal clamp (please circle)                   | Yes / No<br>min                    |
| Incision type (please circle)                             | Vertical / Transverse                                      |                                    |
| Other information (please circle)                         | Hostile abdomen<br>Bi-iliac graft<br>Inflammatory aneurysm |                                    |
| <b>Anaesthetic data for open repair or EVAR</b>           |                                                            |                                    |
| Type of anaesthetic<br><br>Tick or comment as appropriate | General anaesthetic                                        |                                    |
|                                                           | Spinal                                                     |                                    |
|                                                           | Spinal catheter                                            |                                    |
|                                                           | Epidural                                                   | Lumbar/Thoracic<br>Intraop/ postop |
|                                                           | Combined spinal epidural anaesthesia                       |                                    |
|                                                           | Local anaesthesia alone                                    |                                    |
| Estimated blood loss                                      |                                                            | ml                                 |
| Urine output                                              |                                                            | ml                                 |
| Intra-operative fluids                                    | Crystalloids                                               | ml                                 |
|                                                           | Colloids                                                   | ml                                 |
|                                                           | Cell salvaged blood                                        | ml                                 |
|                                                           | Packed cells                                               | Units                              |
|                                                           | Fresh frozen plasma                                        | Units                              |
|                                                           | Platelets                                                  | pools                              |
|                                                           | Cryoprecipitate                                            | Units                              |
| Any intraoperative CVS support (circle)                   | Bolus                                                      | Infusion                           |
| Any intraoperative vasodilators (circle)                  | Bolus                                                      | Infusion                           |
| Requirement for CVS support at end of operation           | Yes / No                                                   | Comment:                           |
| Post-operative care facility (circle)                     | Ward / HDU / ITU                                           |                                    |

CVS, cardiovascular system; EVAR, endovascular aneurysm repair; HDU, high-dependency unit; ITU, intensive treatment unit.

1  
2  
3  
4  
5  
6  
7  
8  
9  
10  
11  
12  
13  
14  
15  
16  
17  
18  
19  
20  
21  
22  
23  
24  
25  
26  
27  
28  
29  
30  
31  
32  
33  
34  
35  
36  
37  
38  
39  
40  
41  
42  
43  
44  
45  
46  
47  
48  
49  
50  
51  
52  
53  
54  
55  
56  
57  
58  
59  
60

Any intraoperative adverse events:

---

---

---

Any adverse events between operation and midnight on day 0:

---

---

---

Any other comments:

---

---

---

Signature of intraoperative data collector: \_\_\_\_\_

For peer review only

1  
2  
3 **6. Postoperative Morbidity** (free text below) – including date  
4

5 (a) Cardiac event  
6

7  
8 (b) Respiratory event  
9

10  
11 (c) Other event  
12

13  
14  
15 **Post-operative Morbidity Survey (POMS) data to be collected from end of**  
16 **surgery until discharge from hospital**  
17

18  
19  
20  
21 **7. Discharge Data**  
22

23 Date of discharge: \_\_\_\_\_  
24

25 Date of death (write NA if not applicable): \_\_\_\_\_  
26

27 Cause of death (write NA if not applicable): \_\_\_\_\_  
28

29 Total hospital length of stay (nearest half day): \_\_\_\_\_  
30

31 Days on ITU (write NA if not applicable): \_\_\_\_\_  
32

33 Days on HDU (write NA if not applicable): \_\_\_\_\_  
34

35 Date when POMS = 0: \_\_\_\_\_  
36  
37  
38  
39  
40  
41  
42  
43  
44  
45  
46  
47  
48  
49  
50  
51  
52  
53  
54  
55  
56  
57  
58  
59  
60

## 8. Additional cardiopulmonary exercise test data

Date.....

| Data                                                                   | Results or comment |
|------------------------------------------------------------------------|--------------------|
| Body mass                                                              | kg                 |
| Resting blood pressure                                                 | mmHg               |
| Resting heart rate                                                     | beats/min          |
| VO <sub>2</sub> at rest : Indexed                                      | ml/kg/min          |
| Absolute                                                               | ml/min             |
| Anaerobic threshold Indexed                                            | ml/kg/min          |
| Absolute                                                               | ml/min             |
| Power output at anaerobic threshold                                    | W                  |
| Anaerobic threshold achieved (please circle)                           | Yes No             |
| VE/VCO <sub>2</sub> at anaerobic threshold                             |                    |
| VO <sub>2</sub> peak Indexed                                           | ml/kg/min          |
| Absolute                                                               | ml/min             |
| Power output at VO <sub>2</sub> peak                                   | W                  |
| O <sub>2</sub> pulse at the start of exercise                          | ml/beat            |
| Peak O <sub>2</sub> pulse                                              | ml/beat            |
| Peak heart rate                                                        | beats/min          |
| Peak blood pressure                                                    | mmHg               |
| VE at rest                                                             | l/min              |
| Peak VE                                                                | l/min              |
| Inducible ischaemia (please circle)                                    | Yes No             |
| Heart rate at ischaemia onset                                          | beats/min          |
| Ischaemia before / after anaerobic threshold (please circle)           | Before After       |
| Oscillatory breathing pattern? (please circle)                         | Yes No             |
| Lowest exercise O <sub>2</sub> saturation                              | %                  |
| Oxygen Uptake Efficiency Slope (VO <sub>2</sub> ml/min / log VE l/min) |                    |
| Peak rating of perceived exertion                                      |                    |
| Peak respiratory exchange ratio                                        |                    |
| Reason for termination                                                 |                    |

VCO<sub>2</sub>, carbon dioxide production; VE, volume of expired air; VO<sub>2</sub>, oxygen consumption.

| Postop day (0 = day of operation)<br>Days run from 0000 – 2359                                                                                                                                                                                                                                                                                              | 1 | 2 | 3 | 4 | 5 | 6 | 7 |
|-------------------------------------------------------------------------------------------------------------------------------------------------------------------------------------------------------------------------------------------------------------------------------------------------------------------------------------------------------------|---|---|---|---|---|---|---|
| <i>Put a tick in the box for each system if any criteria are fulfilled.<br/>All criteria are changes in comparison with preoperative status.</i>                                                                                                                                                                                                            |   |   |   |   |   |   |   |
| <b>Pulmonary:</b> New requirement for supplemental oxygen or other respiratory support.<br>(Include even if institutional practise or preventative for initial postoperative period)                                                                                                                                                                        |   |   |   |   |   |   |   |
| <b>Infectious:</b> Currently on antibiotics or temperature >38 °C in the last 24 hr.<br>(Include antibiotic prophylaxis)                                                                                                                                                                                                                                    |   |   |   |   |   |   |   |
| <b>Renal:</b> Presence of oliguria (500 ml/24 hr),<br>OR increased serum creatinine (>30% from pre-op level) [baseline Cr x 1.3 = _____ µmol/L]<br>OR urinary catheter in place.                                                                                                                                                                            |   |   |   |   |   |   |   |
| <b>Gastro-intestinal:</b> Unable to tolerate an enteral diet for any reason, including nausea, vomiting,<br>and abdominal distension, or use of antiemetic.                                                                                                                                                                                                 |   |   |   |   |   |   |   |
| <b>Cardiovascular system:</b> Diagnostic tests or therapy within the last 24 h for any of the following:<br>New myocardial infarction or ischaemia,<br>Hypotension (requiring pharmacological therapy or fluid therapy >200 ml/hr),<br>Atrial or ventricular arrhythmias,<br>Cardiogenic pulmonary oedema,<br>Thrombotic event (requiring anticoagulation). |   |   |   |   |   |   |   |
| <b>Central nervous system:</b> Presence of new focal deficit, confusion, delirium or coma.                                                                                                                                                                                                                                                                  |   |   |   |   |   |   |   |
| <b>Wound:</b> Wound dehiscence requiring surgical exploration or drainage of pus from the operation<br>wound.                                                                                                                                                                                                                                               |   |   |   |   |   |   |   |
| <b>Haematological:</b> Requirement for any of the following within the last 24 hr: packed erythrocytes,<br>platelets, fresh-frozen plasma, or cryoprecipitate.                                                                                                                                                                                              |   |   |   |   |   |   |   |
| <b>Pain:</b> New postoperative pain significant enough to require strong opioids or regional analgesia.<br>(score until epidural is removed, strong opioids are IV morphine or oxycodone/oxycotin)                                                                                                                                                          |   |   |   |   |   |   |   |
| <b>Data collector initials</b>                                                                                                                                                                                                                                                                                                                              |   |   |   |   |   |   |   |

Please provide comments overleaf detailing:

- Any significant morbidity not described above.
- Reasons why patient still in hospital if no morbidity described above.

If patient discharged, please complete discharge data on page eight of this form
