# Supplementary material for: High-intensity interval exercise training before abdominal aortic aneurysm repair (HIT-AAA): protocol for a randomised controlled feasibility trial
Source: HighWire-hosted journal article supplement (doi:10.1136/bmjopen-2013-004094), 2014-01-01
Supplement: bmjopen-2013-004094supp.pdf [file bmjopen-2013-004094supp.pdf]

**HIT-AAA: Study Data Collection Form (Case Report Form)**

Participant study number: \_\_\_\_\_ Participant initials: \_\_\_\_\_

Site: South Tees / York / Sheffield

Paperwork checklist (please tick):

- Written informed consent provided? [ ]
- Patient information sheet and copy of consent to patient [ ]
- Patient information sheet and copy of consent in medical notes [ ]
- Place study sticker in patient's notes [ ]
- Complete GP letters informing of patient's entry into study [ ]

**1. Baseline data (week 0)**
**Date.....**

|                                                               |                                                                      |                       |                                    |
|---------------------------------------------------------------|----------------------------------------------------------------------|-----------------------|------------------------------------|
| <b>Age</b>                                                    | years                                                                | <b>Body mass</b>      | kg                                 |
| <b>Sex</b>                                                    |                                                                      | <b>Stature</b>        | cm                                 |
| <b>Body mass index</b>                                        | kg/m <sup>2</sup>                                                    | <b>Size of AAA</b>    | cm                                 |
| <b>Baseline observations</b>                                  | BP:                                                                  | RHR:                  | Sats: %                            |
| <b>Date of vascular pre-assessment clinic</b>                 |                                                                      |                       |                                    |
| <b>METs score</b>                                             |                                                                      |                       |                                    |
| <b>ASA score</b>                                              |                                                                      |                       |                                    |
| <b>Modified revised cardiac risk index (answer yes or no)</b> |                                                                      |                       |                                    |
|                                                               | Ischaemic heart disease                                              |                       |                                    |
|                                                               | Congestive cardiac failure                                           |                       |                                    |
|                                                               | Cerebrovascular disease                                              |                       |                                    |
|                                                               | Insulin for diabetes mellitus                                        |                       |                                    |
|                                                               | Creatinine > 177 µmol/l                                              |                       |                                    |
|                                                               | Age >70 years                                                        |                       |                                    |
|                                                               | Abnormal electrocardiogram                                           |                       |                                    |
|                                                               | Rhythm (other than sinus)                                            |                       |                                    |
| <b>Quantify abnormality</b>                                   |                                                                      |                       |                                    |
|                                                               | Uncontrolled blood pressure (systolic >160 mmHg, diastolic >90 mmHg) |                       |                                    |
| <b>Other co-morbidities</b>                                   | Chronic obstructive pulmonary disease                                |                       |                                    |
|                                                               | Asthma                                                               |                       |                                    |
|                                                               | Other respiratory disease                                            |                       |                                    |
|                                                               | Smoker (also tick if quit within 6 months)                           |                       |                                    |
|                                                               | Diabetes mellitus                                                    |                       |                                    |
|                                                               | Peripheral arterial disease                                          |                       |                                    |
|                                                               | Gastrointestinal disease                                             |                       |                                    |
|                                                               | Other (free text):                                                   |                       |                                    |
| <b>Baseline creatinine</b><br>(µmol/l)                        |                                                                      |                       |                                    |
| <b>Baseline eGFR</b><br>(ml/min)                              |                                                                      |                       |                                    |
| <b>Baseline haemoglobin</b><br>(mg/dL)                        |                                                                      |                       |                                    |
| <b>Medications</b><br>(please circle)                         | ACE inhibitor                                                        | Statin                | Beta-blocker                       |
|                                                               | Calcium channel blocker                                              | Antiplatelet<br>A C D | Angiotensin II receptor antagonist |
|                                                               | NSAIDs                                                               | Diuretic              | Insulin                            |
|                                                               | Warfarin                                                             | Oral hypoglycaemics   |                                    |

A, aspirin; AAA, abdominal aortic aneurysm; ACE, angiotensin converting enzyme; ASA, American Society of Anesthesiologists; BP, blood pressure; C, clopidogrel; D, dipyridamole; eGFR, estimated glomerular filtration rate; MET, metabolic equivalents; NSAID, non-steroidal anti-inflammatory drug; RHR, resting heart rate.

**Preference for exercise group (before randomisation)**

Yes / No

## 2. Baseline cardiopulmonary exercise test data (week 0)

Date.....

| Data                                                                   |          | Results or comment |       |
|------------------------------------------------------------------------|----------|--------------------|-------|
| Body mass                                                              |          | kg                 |       |
| Resting blood pressure                                                 |          | mmHg               |       |
| Resting heart rate                                                     |          | beats/min          |       |
| VO <sub>2</sub> at rest :                                              | Indexed  | ml/kg/min          |       |
|                                                                        | Absolute | ml/min             |       |
|                                                                        |          |                    |       |
| Anaerobic threshold                                                    | Indexed  | ml/kg/min          |       |
|                                                                        | Absolute | ml/min             |       |
| Power output at anaerobic threshold                                    |          | W                  |       |
| Anaerobic threshold achieved (please circle)                           |          | Yes                | No    |
| VE/VCO <sub>2</sub> at anaerobic threshold                             |          |                    |       |
|                                                                        |          |                    |       |
| VO <sub>2</sub> peak                                                   | Indexed  | ml/kg/min          |       |
|                                                                        | Absolute | ml/min             |       |
| Power output at VO <sub>2</sub> peak                                   |          | W                  |       |
|                                                                        |          |                    |       |
| O <sub>2</sub> pulse at the start of exercise                          |          | ml/beat            |       |
| Peak O <sub>2</sub> pulse                                              |          | ml/beat            |       |
| Peak heart rate                                                        |          | beats/min          |       |
| Peak blood pressure                                                    |          | mmHg               |       |
|                                                                        |          |                    |       |
| VE at rest                                                             |          | l/min              |       |
| Peak VE                                                                |          | l/min              |       |
|                                                                        |          |                    |       |
| Inducible ischaemia (please circle)                                    |          | Yes                | No    |
| Heart rate at ischaemia onset                                          |          | beats/min          |       |
| Ischaemia before / after anaerobic threshold (please circle)           |          | Before             | After |
|                                                                        |          |                    |       |
| Oscillatory breathing pattern? (please circle)                         |          | Yes                | No    |
| Lowest exercise O <sub>2</sub> saturation                              |          | %                  |       |
| Oxygen Uptake Efficiency Slope (VO <sub>2</sub> ml/min / log VE l/min) |          |                    |       |
|                                                                        |          |                    |       |
| Peak rating of perceived exertion                                      |          |                    |       |
| Peak respiratory exchange ratio                                        |          |                    |       |
|                                                                        |          |                    |       |
| Reason for termination                                                 |          |                    |       |

VCO<sub>2</sub>, carbon dioxide production; VE, volume of expired air; VO<sub>2</sub>, oxygen consumption.

### 3. Multi-disciplinary team data

Date.....

|                      |         |             |     |
|----------------------|---------|-------------|-----|
| Type of surgery:     | Open    | EVAR        |     |
| Complexity of EVAR:  | Complex | Non-complex |     |
| Post-op destination: | Ward    | HDU         | ITU |
| Dated for surgery?   | Yes     | No          |     |

Date if known: \_\_\_\_\_

#### 4. Week 5 cardiopulmonary exercise test data

Date.....

| Data                                                                   |                     | Results or comment  |
|------------------------------------------------------------------------|---------------------|---------------------|
| Body mass                                                              |                     | kg                  |
| Resting blood pressure                                                 |                     | mmHg                |
| Resting heart rate                                                     |                     | beats/min           |
| VO <sub>2</sub> at rest :                                              | Indexed<br>Absolute | ml/kg/min<br>ml/min |
| Anaerobic threshold                                                    | Indexed<br>Absolute | ml/kg/min<br>ml/min |
| Power output at anaerobic threshold                                    |                     | W                   |
| Anaerobic threshold achieved (please circle)                           | Yes                 | No                  |
| VE/VCO <sub>2</sub> at anaerobic threshold                             |                     |                     |
| VO <sub>2</sub> peak                                                   | Indexed<br>Absolute | ml/kg/min<br>ml/min |
| Power output at VO <sub>2</sub> peak                                   |                     | W                   |
| O <sub>2</sub> pulse at the start of exercise                          |                     | ml/beat             |
| Peak O <sub>2</sub> pulse                                              |                     | ml/beat             |
| Peak heart rate                                                        |                     | beats/min           |
| Peak blood pressure                                                    |                     | mmHg                |
| VE at rest                                                             |                     | l/min               |
| Peak VE                                                                |                     | l/min               |
| Inducible ischaemia (please circle)                                    | Yes                 | No                  |
| Heart rate at ischaemia onset                                          |                     | beats/min           |
| Ischaemia before / after anaerobic threshold (please circle)           | Before              | After               |
| Oscillatory breathing pattern? (please circle)                         | Yes                 | No                  |
| Lowest exercise O <sub>2</sub> saturation                              |                     | %                   |
| Oxygen Uptake Efficiency Slope (VO <sub>2</sub> ml/min / log VE l/min) |                     |                     |
| Peak rating of perceived exertion                                      |                     |                     |
| Peak respiratory exchange ratio                                        |                     |                     |
| Reason for termination                                                 |                     |                     |

VCO<sub>2</sub>, carbon dioxide production; VE, volume of expired air; VO<sub>2</sub>, oxygen consumption.

Preference for exercise group (following intervention) Yes / No

Week 5 Size of AAA (exercise group only) cm

If surgery delayed by >4 weeks please complete repeat exercise test sheet (p. 9)

## 5. Intra-operative data

Date of admission: \_\_\_\_\_

Date of intervention: \_\_\_\_\_

Days since last exercise test: \_\_\_\_\_ Test number:      **1**      **2**      **3**

### Intra-operative details

|                                                           |                                                            |                                    |
|-----------------------------------------------------------|------------------------------------------------------------|------------------------------------|
| <b>Type of repair (circle)</b>                            | Open repair                                                | EVAR                               |
| <b>Open repair only:</b>                                  |                                                            |                                    |
| <b>Surgical data</b>                                      | Aortic cross-clamp time                                    | min                                |
|                                                           | Use of supra-renal clamp (please circle)                   | Yes / No<br>min                    |
| Incision type (please circle)                             | Vertical / Transverse                                      |                                    |
| Other information (please circle)                         | Hostile abdomen<br>Bi-iliac graft<br>Inflammatory aneurysm |                                    |
| <b>Anaesthetic data for open repair or EVAR</b>           |                                                            |                                    |
| Type of anaesthetic<br><br>Tick or comment as appropriate | General anaesthetic                                        |                                    |
|                                                           | Spinal                                                     |                                    |
|                                                           | Spinal catheter                                            |                                    |
|                                                           | Epidural                                                   | Lumbar/Thoracic<br>Intraop/ postop |
|                                                           | Combined spinal epidural anaesthesia                       |                                    |
|                                                           | Local anaesthesia alone                                    |                                    |
| Estimated blood loss                                      | ml                                                         |                                    |
| Urine output                                              | ml                                                         |                                    |
| Intra-operative fluids                                    | Crystalloids                                               | ml                                 |
|                                                           | Colloids                                                   | ml                                 |
|                                                           | Cell salvaged blood                                        | ml                                 |
|                                                           | Packed cells                                               | Units                              |
|                                                           | Fresh frozen plasma                                        | Units                              |
|                                                           | Platelets                                                  | pools                              |
|                                                           | Cryoprecipitate                                            | Units                              |
| Any intraoperative CVS support (circle)                   | Bolus                                                      | Infusion                           |
| Any intraoperative vasodilators (circle)                  | Bolus                                                      | Infusion                           |
| Requirement for CVS support at end of operation           | Yes / No                                                   | Comment:                           |
| Post-operative care facility (circle)                     | Ward / HDU / ITU                                           |                                    |

CVS, cardiovascular system; EVAR, endovascular aneurysm repair; HDU, high-dependency unit; ITU, intensive treatment unit.

Any intraoperative adverse events:

---

---

---

Any adverse events between operation and midnight on day 0:

---

---

---

Any other comments:

---

---

---

Signature of intraoperative data collector: \_\_\_\_\_

**6. Postoperative Morbidity** (free text below) – including date

(a) Cardiac event

(b) Respiratory event

(c) Other event

**Post-operative Morbidity Survey (POMS) data to be collected from end of surgery until discharge from hospital**

**7. Discharge Data**

Date of discharge: \_\_\_\_\_

Date of death (write NA if not applicable): \_\_\_\_\_

Cause of death (write NA if not applicable): \_\_\_\_\_

Total hospital length of stay (nearest half day): \_\_\_\_\_

Days on ITU (write NA if not applicable): \_\_\_\_\_

Days on HDU (write NA if not applicable): \_\_\_\_\_

Date when POMS = 0: \_\_\_\_\_



## 8. Additional cardiopulmonary exercise test data

Date.....

| Data                                                                   |          | Results or comment |           |
|------------------------------------------------------------------------|----------|--------------------|-----------|
| Body mass                                                              |          |                    | kg        |
| Resting blood pressure                                                 |          |                    | mmHg      |
| Resting heart rate                                                     |          |                    | beats/min |
| VO <sub>2</sub> at rest :                                              | Indexed  |                    | ml/kg/min |
|                                                                        | Absolute |                    | ml/min    |
|                                                                        |          |                    |           |
| Anaerobic threshold                                                    | Indexed  |                    | ml/kg/min |
|                                                                        | Absolute |                    | ml/min    |
| Power output at anaerobic threshold                                    |          |                    | W         |
| Anaerobic threshold achieved (please circle)                           |          | Yes                | No        |
| VE/VCO <sub>2</sub> at anaerobic threshold                             |          |                    |           |
|                                                                        |          |                    |           |
| VO <sub>2</sub> peak                                                   | Indexed  |                    | ml/kg/min |
|                                                                        | Absolute |                    | ml/min    |
| Power output at VO <sub>2</sub> peak                                   |          |                    | W         |
|                                                                        |          |                    |           |
| O <sub>2</sub> pulse at the start of exercise                          |          |                    | ml/beat   |
| Peak O <sub>2</sub> pulse                                              |          |                    | ml/beat   |
| Peak heart rate                                                        |          |                    | beats/min |
| Peak blood pressure                                                    |          |                    | mmHg      |
|                                                                        |          |                    |           |
| VE at rest                                                             |          |                    | l/min     |
| Peak VE                                                                |          |                    | l/min     |
|                                                                        |          |                    |           |
| Inducible ischaemia (please circle)                                    |          | Yes                | No        |
| Heart rate at ischaemia onset                                          |          |                    | beats/min |
| Ischaemia before / after anaerobic threshold (please circle)           |          | Before             | After     |
|                                                                        |          |                    |           |
| Oscillatory breathing pattern? (please circle)                         |          | Yes                | No        |
| Lowest exercise O <sub>2</sub> saturation                              |          |                    | %         |
| Oxygen Uptake Efficiency Slope (VO <sub>2</sub> ml/min / log VE l/min) |          |                    |           |
|                                                                        |          |                    |           |
| Peak rating of perceived exertion                                      |          |                    |           |
| Peak respiratory exchange ratio                                        |          |                    |           |
|                                                                        |          |                    |           |
| Reason for termination                                                 |          |                    |           |

VCO<sub>2</sub>, carbon dioxide production; VE, volume of expired air; VO<sub>2</sub>, oxygen consumption.

| Postop day (0 = day of operation)<br>Days run from 0000 – 2359                                                                                                                                                                                                                                                                                              | 1 | 2 | 3 | 4 | 5 | 6 | 7 |
|-------------------------------------------------------------------------------------------------------------------------------------------------------------------------------------------------------------------------------------------------------------------------------------------------------------------------------------------------------------|---|---|---|---|---|---|---|
| Put a tick in the box for each system if any criteria are fulfilled.<br>All criteria are changes in comparison with preoperative status.<br><b>Level of care ( 1 / 2 / 3 )</b>                                                                                                                                                                              |   |   |   |   |   |   |   |
| <b>Pulmonary:</b> New requirement for supplemental oxygen or other respiratory support.<br>(Include even if institutional practise or preventative for initial postoperative period)                                                                                                                                                                        |   |   |   |   |   |   |   |
| <b>Infectious:</b> Currently on antibiotics or temperature >38 °C in the last 24 hr.<br>(Include antibiotic prophylaxis)                                                                                                                                                                                                                                    |   |   |   |   |   |   |   |
| <b>Renal:</b> Presence of oliguria (500 ml/24 hr),<br>OR increased serum creatinine (>30% from pre-op level) [baseline Cr x 1.3 = _____ µmol/L]<br>OR urinary catheter in place.                                                                                                                                                                            |   |   |   |   |   |   |   |
| <b>Gastro-intestinal:</b> Unable to tolerate an enteral diet for any reason, including nausea, vomiting,<br>and abdominal distension, or use of antiemetic.                                                                                                                                                                                                 |   |   |   |   |   |   |   |
| <b>Cardiovascular system:</b> Diagnostic tests or therapy within the last 24 h for any of the following:<br>New myocardial infarction or ischaemia,<br>Hypotension (requiring pharmacological therapy or fluid therapy >200 ml/hr),<br>Atrial or ventricular arrhythmias,<br>Cardiogenic pulmonary oedema,<br>Thrombotic event (requiring anticoagulation). |   |   |   |   |   |   |   |
| <b>Central nervous system:</b> Presence of new focal deficit, confusion, delirium or coma.                                                                                                                                                                                                                                                                  |   |   |   |   |   |   |   |
| <b>Wound:</b> Wound dehiscence requiring surgical exploration or drainage of pus from the operation wound.                                                                                                                                                                                                                                                  |   |   |   |   |   |   |   |
| <b>Haematological:</b> Requirement for any of the following within the last 24 hr: packed erythrocytes,<br>platelets, fresh-frozen plasma, or cryoprecipitate.                                                                                                                                                                                              |   |   |   |   |   |   |   |
| <b>Pain:</b> New postoperative pain significant enough to require strong opioids or regional analgesia.<br>(score until epidural is removed, strong opioids are IV morphine or oxycodone/oxycotin)                                                                                                                                                          |   |   |   |   |   |   |   |
| <b>Data collector initials</b>                                                                                                                                                                                                                                                                                                                              |   |   |   |   |   |   |   |

Please provide comments overleaf detailing:

- Any significant morbidity not described above.
- Reasons why patient still in hospital if no morbidity described above.

If patient discharged, please complete discharge data on page eight of this form

| Day   | Post-operative comments (include initials of data collector) |
|-------|--------------------------------------------------------------|
| ..... | .....                                                        |
| ..... | .....                                                        |
| ..... | .....                                                        |
| ..... | .....                                                        |
| ..... | .....                                                        |
| ..... | .....                                                        |
| ..... | .....                                                        |
| ..... | .....                                                        |
| ..... | .....                                                        |
| ..... | .....                                                        |
| ..... | .....                                                        |
| ..... | .....                                                        |
| ..... | .....                                                        |
| ..... | .....                                                        |
| ..... | .....                                                        |
| ..... | .....                                                        |
| ..... | .....                                                        |
| ..... | .....                                                        |
